# Supplementary material for: Y-mer: A k-mer based method for determining human Y chromosome haplogroups from ultra-low sequencing depth data
Source: Research Square preprint supplement (doi:10.21203/rs.3.rs-5042960/v2), 2025-06-16
Supplement: Supplementary file 1 [file 084206e947212390470c7f81.docx]

**Supplement data.**

**Model testing and accuracy estimation**

In model testing we use PREDICTER.R to make calls of haplogroups on the basis of the distance of individual test samples from the profiles estimated from the k-mer counts for haplogroups used in the model.

**Interpreting the output of PREDICTER.R**

In the following we will cover the output produced by the caller and present some possible interpretations for the produced values.

1. **Sequencing coverage uniformity**

After the first section of output, the sequencing coverage uniformity value is presented for all k-mers in sample:

[1] "Sequencing coverage uniformity, Dli (smaller is better):"

[1] 0.9604335

The reported Dli values (possible range 0…+∞) measure the sequencing uniformity – lower values indicate better uniformity and larger values indicate non-uniform sequencing coverage.

Meaning of the reported *Dli* value.

Let the expected (average) sequencing coverage be *cov*, *cov*=E(*N*) where the *N* is a coverage of a particular position. The coverage *N* varies from region to region and for the 2nd generation sequencing – in ideal conditions – follows Poisson distribution, *N*~Poi(*cov*). As for Poisson distribution mean and variance are equal, the variability of coverage is Cov(*N*)=*cov*. However, if the sample is not in an ideal condition or if there have been even slight irregularities in sample preparation or there have been selectivity in sequencing, then the coverage variability tends to increase. We model the coverage variability as

Cov(*N*) = *cov*+*cov*2 · *Dli*.

The value *Dli* = 0 would indicate an ideal sample/uniform sequencing and higher *Dli* values indicate uneven sequencing – with some areas in genome having higher coverage than others.

As our method depends heavily on detection of copy-number variations, uneven sequencing coverage can significantly lower the method ability to distinguish between haplogroups (lowers call rate).

Remarks:

If one would model coverages using negative binomial distribution (we do not make this assumption), then 1/Dli would be the estimate for overdispersion parameter.

The coverage variations that can be predicted (by *k*-mer CG-count) do not influence this statistic – it is possible to have relatively high CG-bias but low *Dli* value (If all CG rich areas are uniformly highly covered and AT-rich areas have uniformly low coverage then *Dli* can be low – as the variability in coverage is predictable by caller in this case).

**b. Raw distances**

The distance between sample and haplogroup *h*, *dh*, indicate how similar the number of repeats profile of a sample are to the haplogroup average copy-number profile. The raw distances raported for a sample:

[1] "Raw distances:"

AB C E G H IJ LT N

V1 52.8589 54.30764 47.45254 34.74817 20.9895 27.06756 29.77353 24.07964

O Q R

V1 16.6212 49.25397 44.93299

are calculated as *dh*-1, where the formula for distance *dh* is presented in Equation 1 in the Statistical Appendix. The expected value of *dh*, E(*dh*)=1 if the sample originates from haplogroup *h*. So the reported raw distance value is around 0 if the proposed haplogroup is correct (values in the range -1…+∞ are possible). If parts of the sample genome have been degraded or if the individuals used for estimating the haplogroup profile come from another subhaplogroup than the persons used for model building then the smallest raw distance might be considerably larger than zero.

In conclusion: if the smallest raported distance is considerably larger than zero, then there exists some discrepancy between representatives of a given haplogroup used for model estimation and the sample. It might be, for example, that the representatives come from another subhaplogroup, different sequencing techniques were used to sequence the individuals in the model, or the conteporary samples used during model building had more newer, haplogroup-specific mutations than the ancient sample one is testing. Usually large minimum distances itself is not a reason for concern, but can sometimes hint to a possible problem (it could be caused by a situation where true haplogroup of the individual were not actually present in the model - then we might also observe a large raw distance for a sample; or because of contamination; or becuse the sample is not a typical representative of a haplogroup but comes from a rather rare subhaplogroup … ).

**Using the model**

For the following steps, the user will need to specify the path to the folder containing target .fastq files the Yhg of which will be determined and the path to the folder containing genome tester components.

A. DETERMINING K-MER FREQUENCIES

Firstly, the k-mer frequencies in the target .fastq files will have to be determined. There are multiple ways to do that. The first two options apply in cases where the user wants to run only just one model at a time, the third option is for testing multiple models.

I. Using binary gmer_counter database and fastq file(s) as input,:

gmer_counter -dbb **model.dbb** /path/sample.fastq |cut -f 3 |tail -n +3 > sample.counts

II. Same as in I., but using .bam as an input:

samtools fasta /path/sample.bam | gmer_counter -dbb model.dbb - |cut -f 3 |tail -n +3 > sample.counts

III. list file prepared with GenomeTester4, preferably if using multiple models:

glistmaker sample.fastq -w 25 -o sample

glistquery sample_25.list -f **model.txt** |cut -f 2 > sample.counts

The output file ‘sample.counts’ reports at each line the frequencies of the k-mers in the same order as the k-mers in the ‘model.dbb’ file. If the first line contains a sample ID, this is reported in the output file.

B. CALLING HG-s

**Rscript PREDICTER.R model_path/model.Rdata results_path/sample.counts results_path/sample.Rdata > results_path/sample.txt**

After k-mer counting, the above given Rscript command predicts haplogroups using the trained model (model.Rdata) and k-mer counts based on tested sample (sample.counts). Results  will be written to output files sample.txt and R formatted output (sample.Rdata).

**Accuracy estimation**

We used match probability as the measure of accuracy of haplogroup prediction applied on a validation set of high coverage genomes where the haplogroup had previously been determined at high confidence from SNV data.
