# Supplementary material for: Y-mer: A k-mer based method for determining human Y chromosome haplogroups from ultra-low sequencing depth data
Source: Research Square preprint supplement (doi:10.21203/rs.3.rs-5042960/v2), 2025-06-16
Supplement: Supplementary file 2 [file 6ef37a163af0177a58157b26.xlsx]

## Sheet: 1. HG002 three repeats
Supplementary Table 1. Three regions in chrY assembly of HG002 used for k-mer selection.
Y chromosome regions	Start	End	Lengt	k-mers in total	unique chrY k-mers
Heterochromatin	27449932	62072743	34622811	646798	543115
Centromere	10565751	10883085	317334	9325	5175
DYZ19	20961706	21226211	264505	72134	70103
Note, Heterochromatin includes DYZ1 and DYZ2 regions, Centromere DYZ3 involves a 171-bp and DYZ19 a 125-bp tandem repeat
Start, End refer to the start and end coordinates in HG002 assembly

## Sheet: 2. 43Y -> 21Y
Supplementary Table 2. The selection of chrY assemblies (Hallast et al. 2023) representing 21 different haplogroups
Haplogroup	Sample	contigouos	total contigs	in model	M21NE	p-value	M21E	p-value	M21W	p-value	depth
A0b	HG01890	1	10	1	R1a1	0.001326	AB	5.77e-160	AB	1.72e-143	0.995088					Not right HG becouse of missing HG in model.
A1a	HG02666	1	2	1	J2a	0.110681	AB	8.4e-172	AB	1.23e-129	0.995142
B2b1	NA19384	3	32	1	R1a1	0.071347	AB	5.52e-153	AB	2.33e-134	0.999262
E1a2a	NA19239	4	217	1	E2a	5.9e-157	E4	1.5e-84	E	7.25e-222	1.00595
E1a2b	HG03248	2	18	1	E2a	1.85e-73	E4	2.58e-219	E	5.83e-194	1.00606
E1a2b	HG02572	4	44		E2a	2.02e-60	E4	2.76e-172	E	1.44e-126	0.989327
E1b1b	HG01109	4	48		E2a	0	E2	1.22e-131	E	4.93e-282	0.99891
E1b1b	HG01106	3	16		E2a	8.66e-289	E2	1.68e-131	E	5.61e-271	0.999019
E1b1b	HG01457	2	9	1	E2a	3.35e-170	E2	3.59e-159	E	9.3e-261	0.997717
E1b1b	NA19331	3	100		E2a	1.67e-101	E2	7.54e-104	E	1.74e-119	0.996654
E1b1a	HG03065	5	29		E2a	7.45e-170	E1	2.52e-75	E	6.21e-260	0.998874
E1b1a	HG02953	3	60		E2a	6.96e-112	E1	3.45e-55	E	1.96e-174	0.999293
E1b1a	NA19705	3	7		E2a	1.19e-123	E1	2.78e-91	E	0	0.998834
E1b1a	HG02554	4	35		E2a	1.09e-75	E1	2e-77	E	1.89e-132	0.998913
E1b1a	HG02717	5	20		E2a	3.58e-204	E1	5.08e-65	E	0	0.99825
E1b1a	HG03471	2	23		E2a	4.77e-172	E1	1.81e-90	E	0	0.99891
E1b1a	HG02011	2	6	1	E2a	3.23e-113	E1	1.2e-86	E	6.51e-193	0.998809
E1b1a	HG02486	3	30		E2a	2.19e-164	E1	5.83e-87	E	5.49e-292	0.998851
E1b1a	HG03371	2	61		E2a	1.64e-189	E1	1.66e-95	E	4.66e-304	0.998648
E1b1a	NA19317	2	17		E2a	1.5e-124	E1	1.4e-84	E	2.91e-217	0.998948
E1b1a	NA19347	3	13		E2a	3.38e-118	E1	3.92e-93	E	5.06e-216	0.998968
C1a1a	NA18989	4	44	1	G2a	0.000486	C	5.74e-209	C	2.37e-165	0.998427
G2a2b	HG03579	6	12	1	G2a	0	G	8.62e-183	G	5.27e-158	0.986997
H1a1a	HG03009	4	53	1	LT	4.82e-12	H	0	H	1.18e-204	0.999312
J2a1a	HG02492	3	14	1	J2a	0	J2	4.18e-70	IJ	1.73e-36	0.999392
J1a2b	HG01258	4	18		J1	4.66e-191	J1	9.41e-89	IJ	9.17e-57	0.99935
J1a2b	T2T	1	1	1	J1	5.42e-308	J1	1.33e-109	IJ	2.93e-88	0.999563
N1c1a	HG00358	1	11	1	N3a4	2.76e-16	N3	0	N	1.25e-244	0.999957
O1b1a	NA18534	3	45	1	J2b	0.003115	O25	1.88e-203	O	5.11e-169	0.99876
O2a1c	HG01596	4	49	1	R1a1	0.257242	O6	1.88e-109	O	8.4e-273	0.999305
O2a2a	HG00673	4	124	1	LT	0.261896	O3	5.63e-30	O	1.44e-207	0.999284
O2a2b	HG00512	5	113		R1a1	3.4e-15	O3	4.77e-118	O	3.22e-190	0.999425
O2a2b	HG00621	2	16	1	LT	8.15e-32	O3	4.59e-93	O	1.46e-82	0.999324
Q1b1a	HG01928	4	10		Q	0	Q1	8.2e-105	Q	3.31e-152	1.00177
Q1b1a	HG01952	2	12	1	Q	4.1e-181	Q1	1.94e-124	Q	9.96e-106	0.999604
R2a	HG03732	5	66	1	Q	1.52e-28	R2	9.25e-261	R	5.73e-233	0.999393
R1a1a	HG03492	6	60	1	R1a1	0.199162	R1a	0	R	1.19e-250	0.999268
R1b1a	HG00096	5	75		R1b2	0.000496	R1b	0	R	5.3e-239	0.999883
R1b1a	HG01505	1	17	1	R1b3	0.001074	R1b	0	R	1.21e-180	0.999558
R1b1a	HG01243	3	23		R1b3	0.002814	R1b	2.51e-192	R	8.17e-171	0.999897
R1b1a	HG00731	5	45		R1b3	2.11e-05	R1b	2.24e-91	R	2.51e-80	1.00001
R1b1a	NA20509	2	54		R1b1	2.04e-20	R1b	1.76e-289	R	3.01e-272	0.999907
R1b1a	HG01358	5	23		R1b1	1.02e-45	R1b	0	R	2.17e-282	1.00097
R1b1a	NA19650	3	11		R1b1	3.54e-53	R1b	0	R	1.56e-245	0.996658
selected from 43 (marked "1" in column "in model"), because of duplicates, M21NE, M21E, and M21W 50k model is used to predict HG-s by our models. M21W and M21E models predict HG-s precisely. M21NE model does not contain all HG-s within 43 sequenced chrYs. In the M21W model sequencing depth is calculated, to be 1 and approximately it is so.
Figure. 21 chrY-s ˇassemblies we used in selecting k-mers to find suitable ones for creating model. One from haplogroup with lowest contigs parameters was chosen. NE_EUROPE, EUROPE and WORLD model with 50000 k-mer version is used to predict HG, predicting p-value and sequence coverage
Current samples list do not contain representaors from D, F, K, L, T and I HG-s.
Appromaxely 12 milj. k-mer are suitable from 1 representer per HG, 12,2 milj. k-mers for all assemblies.
modificated figure 1 from https://doi.org/10.1101/2022.12.01.518658

## Sheet: 3. 21Y 10-100k k-mers
Supplementary Table 3. Number of k-mers selected for 21 Y models.
a.	Number of haplogroup-specific k-mers chosen from the list of 12,003,307 k-mers
	10000	20000	30000	40000	50000	60000	70000	80000	90000	100000
M21NE	295181	488227	631798	753034	872163	994633	1121746	1253659	1389981	1529400
M21E	330601	553320	711513	839370	958261	1076374	1199215	1327743	1461437	1599069
M21W	182784	328354	448053	555252	653943	748932	843475	938225	1033057	1127514
b.	Numbers of k-mers chosen from the list of 5,071,089 k-mers for sequence depth estimation
	10000	20000	30000	40000	50000	60000	70000	80000	90000	100000
M21NE	5050785	5034818	5015240	4989143	4951561	4901945	4841768	4773398	4697411	4614019
M21E	5025268	4997250	4966696	4926118	4873154	4808034	4731492	4645517	4550897	4450858
M21W	5051984	5034031	5011899	4981728	4943288	4898703	4848840	4795819	4739130	4680296
Note, a. - Total number of chrY specific k-mers extracted from from the assemblies of 21 Y chromosomes (Hallast et al. 2023) is 12,003,307.
b. In depth estimation we used 5,071,089 k-mers extracted from GRCh38 (Sauk et al. 2019), excluding haplogroup-specific k-mers used in (a).

## Sheet: 4. HG tree, levels and samples
Supplementary Table 4. Y chromosome phylogeny and three level haplogroup structure used in this study.
																		Number of distinct branches captured	11	22	23		1000GP	1000GP	EGV
																			Level 1	Level 2	Level 3	Total	All	Europe	Estonia
																			World	Europe	NE-Europe	Number of individuals
	Branch defining markers																	haplogroup
	L1086																	A00
		V148																A0	AB	AB		2	2
			M31															A1				3	3
				M181														B				7	7
						M64												D2				20	20
																		E1a	E	E1		3	3
										M180	U174							E1a1				152	152
											U209							E1a2				90	90
										Z5994								E1b				13	13
										M78								E2a		E2	E2a	45	21	4	24
										CTS8288								E2b				19	16	2	3
										M310								E2c				4	3		1
								M33										E4		E4		20	20
							M75											E5				5	5
							M217											C3	C	C		11	10		1
								M8										C1				4	4
								K108										C5a				17	17
																		F				1	1
								M201										G	G	G		3	2	1	1
								M285										G1				3	2		1
									Z6553									G2a			G2a	23	15	6	8
						M89			M52									H1a	H	H		47	47
									Z5867									H1b				3	3
								Z5857										H3				12	12
										Z58								I1a	IJ	I1	I1a	46	16	11	30
										Z63								I1c			Ic	27	2	2	25
										Y2592								I1d			I1d	102	10	9	92
										PH790								I1i			I1i	7			7
										A5697								I1m			I1m	6			6
										Y11205								I1n				1			1
										Z131								I1z				3	3	3
											M423							I2a		I2	I2	20	2	1	18
											L158							I2b				5	5	1
											Y3259							I2d				21	10	6	11
											S2555							I2e				1	1
									M267									J1		J1	J1	16	15	4	1
																		J2				1	1
									M172	M410								J2a		J2	J2a	46	40	15	6
										M102								J2b			J2b	36	20	8	16
								Y28299										K2				1	1
									M27									L1a	LT	LT	LT	27	27
									L162									T1a				8	8	4
												F1101						N1	N			2	2
							M9					P43						N2a				2			2
												M2019						N3a2		N3		3			3
													CTS10760					N3a3			N3a3	372	5	5	367
													Z1936					N3a4			N3a4	106	18	18	88
										F2930								N4		N4		7	7
													Page23					O3a	O	O3		36	36
													Y20					O3b				20	20
													CTS800					O3c				3	3
													CTS6489					O3f				3	3
													F1863					O3g				5	5
													CTS201					O3h				9	9
													F2472					O3j				3	3
												L465						O6		O6		33	33
											CTS1754							O7				2	2
												F31						O1a		O1		18	18
												CTS5726						O1b				1	1
													F167					O2		O2'5		9	9
													M95					O2a				44	44
												P49						O5				22	22
												CTS30						Q1	Q	Q	Q	3	3
													M3					Q1a				31	31
													M971					Q1b				2	2
												L940						Q1d				2			2
												B660						Q1f				1	1
												YP4011						Q1g				1			1
											F1096							Q2				4	4
										L275								Q3				4	4
													Z283					R1a1	R	R1a	R1a1	366	8	8	358
													Z93					R1a2			R1a2	91	77	3	14
												CTS4385						R1a3				3	1	1	2
												V2219						R1b14		R1b		1	1
													V1636					R1b19				1	1
														Z2103				R1b11			R1b11	10	5	2	5
															Z2118			R1b17				2	2	1
																		R1b-L11				7	7	4
																	U152	R1b1			R1b1	47	43	31	4
																	S461	R1b2			R1b2	40	33	21	7
																	DF27	R1b3			R1b3	100	90	41	10
																	L238	R1b4				3	2	2	1
																	DF19	R1b5				5	3	3	2
																	DF99	R1b21				1			1
																	PH2278	R1b24				1			1
															L11	S1194		R1b18				1			1
																	Z381	R1b6			R1b6	46	23	17	23
																	FGC3861	R1b7				1	1	1
																	Z19	R1b8			R1b8	15	5	5	10
																	Y3443	R1b25				4			4
																	S16185	R1b26				1			1
																	A12137	R1b27				1			1
										M479								R2		R2		29	29
Note, haplogroup labels follow the nomenclature of Karmin et al. 2015. Haplogroup assignments of the 1000 Genomes Project data were made from Poznik et al. 2016 data.

## Sheet: 5. Samples in model training
Supplementary Table 5. Sample ID-s used in the three training sets.
Haplogroups in the training set					Individual IDs used in the training set
110W	213E	222NE	43I1	80R1	Individ1	Individ2	Individ3	Individ4	Individ5	Individ6	Individ7	Individ8	Individ9	Individ10
AB	AB				HG01890	HG02982	HG02613	HG02645	HG02666	HG00553	HG03225	HG03376	NA19043	NA19384
E					HG02756	HG01187	HG01204	HG02628	HG01054	HG01110	HG01088	NA20348	HG01094	HG01305
C	C				HG00628	HG02141	HG02373	HG03917	NA18971	NA20911	NA21091	NA21094	NA21100	NA18989
G	G				NA20767	NA20858	HG01097	HG01311	HG01512	HG02224	HG02681	HG03708	HG02789	EGC67
H	H				HG01583	HG02786	HG03009	HG03644	HG03594	HG02684	HG03680	HG03697	HG03792	HG03991
IJ					HG00101	NA07051	HG00189	HG00360	HG01101	HG00136	HG01988	HG01069	HG01164	HG00160
LT	LT	LT			HG03821	HG03875	HG03885	HG03900	HG03920	HG01133	HG01190	NA19655	NA20520	NA20527
N					HG02026	NA18613	HG00280	HG00341	HG00182	HG00187	HG00271	HG00278	NA18558	NA18608
O					HG02137	HG00650	HG00556	HG00403	HG00559	HG00580	NA18647	HG00457	HG02409	NA18943
Q		Q			HG03914	NA19682	HG01124	HG01139	HG01142	HG01565	NA19771	HG03943	HG02134	HG03681
R					HG01617	HG01982	HG00107	HG00112	HG00126	HG00141	HG02783	HG03015	HG03691	HG03702
	E1				HG02756	HG01556	HG01986	HG02464	HG01187	HG01305	HG02895	HG02923	HG01204	HG03385
	E2				HG01054	HG01072	HG01200	HG01110	HG01112	HG01325	HG01088	HG01104	HG01161	NA20348
	E4				HG02461	HG02570	HG03027	HG03048	HG03246	HG03258	NA18856	NA18910	NA19189	HG01094
	I1				HG00101	HG00252	NA07051	HG00189	HG00308	HG00325	HG00372	HG00117	HG00140	EGC117
	I2	I2			HG00360	HG02536	HG01101	HG01167	HG01344	NA20351	HG00136	HG01527	HG02470	NA11932
	J1	J1			HG01069	HG01130	HG01253	HG01431	HG01494	HG01571	HG02253	HG03767	NA12282	NA20543
	J2				HG01589	HG01164	HG01402	HG01412	HG03660	HG03693	HG00160	HG01509	EGC381	EGC2
	N3				HG00280	HG00341	HG00351	HG00182	HG00187	HG00271	HG00278	HG00284	HG00290	HG00311
	N4				HG02138	HG04015	NA18639	NA18747	NA18748	NA18558	NA18608
	O3				HG00881	HG00524	HG00622	HG00653	HG02137	HG00650	HG00556
	O6				HG02070	HG02128	HG02392	NA18544	HG00403	HG00421	HG00445	HG00475	HG00536	HG00707
	O1				HG00595	HG01811	HG02017	HG02079	HG02250	HG02353	HG02360	HG00580	NA18536	NA18647
	O25				HG00457	NA18534	HG02409	HG02410	HG02512	HG02521	HG04140	NA18990	NA18943	NA18953
	Q1				NA19682	HG01124	HG01139	HG01142	HG01565	HG01892	HG01920	HG01938	HG01961	HG01974
	R1a				HG03687	HG03750	HG03803	HG03887	HG03960	HG04131	NA20864	NA21092	NA12155
	R1b				HG00107	HG00112	HG00126	HG00141	EGC969	EGC851	EGC910	EGC334	EGC348	EGC620
	R2				HG02783	HG03015	HG03691	HG03702	HG03718	HG03727	HG04158	HG04182	HG04225	NA20845
		E2a			HG01054	HG01072	HG01200	EGC406	EGC247	EGC179	EGC83	EGC195	EGC422	EGC754
		G2a			HG01097	HG01311	HG01512	HG02224	HG02681	HG03708	EGC67	EGC435	EGC734	EGC895
		I1a	I1a		HG00101	HG00252	EGC16	EGC574	EGC219	EGC79	EGC243	EGC81	EGC569	EGC907
		I1c	I1c		NA07051	EGC607	EGC426	EGC277	EGC423	EGC449	EGC544	EGC813	EGC829	EGC991
		I1d	I1d		HG00189	HG00308	HG00325	HG00372	EGC117	EGC625	EGC532	EGC148	EGC604	EGC230
		I1i	I1i		EGC105	EGC376	EGC643	EGC844	EGC850	EGC960	EGC1095
		I1m	I1m		EGC471	EGC306	EGC628	EGC869	EGC898	EGC1071
		J2a			HG01164	HG01402	HG01412	HG03660	HG03693	EGC381	EGC470	EGC519	EGC746	EGC1063
		J2b			HG00160	HG01509	EGC279	EGC264	EGC2	EGC346	EGC430	EGC588	EGC871	EGC1152
		N3a3			HG00280	HG00341	HG00351	EGC102	EGC147	EGC18	EGC48	EGC97	EGC209	EGC603
		N3a4			EGC263	EGC261	EGC15	EGC51	EGC46	EGC35	EGC331	EGC10	EGC42	EGC229
		R1a1		R1a1	EGC52	EGC168	EGC78	EGC246	EGC366	EGC54	EGC14	EGC245	EGC133	EGC272
		R1a2		R1a2	HG03803	HG03887	HG03960	HG04131	NA20864	NA21092	EGC290	EGC7	EGC239	EGC177
		R1b11		R1b11	EGC237	EGC134	EGC851	EGC940	EGC1029	HG01277	HG01515	NA18645	NA20532	NA20866
		R1b1		R1b1	EGC416	EGC672	EGC826	EGC969	HG00244	NA07357	NA19652	NA20509	HG01383	HG01767
		R1b2		R1b2	EGC194	EGC269	EGC501	EGC910	EGC918	EGC1057	EGC1062	HG00242	HG01500	NA20318
		R1b3		R1b3	HG00107	HG00112	HG00126	HG00141	EGC126	EGC5	EGC73	EGC334	EGC657	EGC926
		R1b6		R1b6	EGC526	EGC284	EGC68	EGC348	EGC612	EGC12	EGC540	EGC204	EGC512	EGC774
		R1b8		R1b8	EGC58	EGC299	EGC356	EGC620	EGC894	EGC981	EGC987	EGC997	EGC1009	EGC1112

## Sheet: 6. Female samples
Supplementary Table 6. Female samples used for removal of k-mers that are not specific to chrY
EGC	1000G
EGC1161	HG00100
EGC1162	HG00180
EGC1163	HG00266
EGC1164	HG00629
EGC1165	HG01055
EGC1166	HG01254
EGC1167	HG01510
EGC1168	HG01889
EGC1169	HG02140
EGC1170	HG02787
EGC1171	HG02983
EGC1172	HG03595
EGC1173	HG03690
EGC1174	NA18946
EGC1175	NA20910

## Sheet: 7.Validation set based on V110 
Supplementary Table 7. Individuals codes for validation set V110
AB	HGDP00449	HGDP00462	HGDP00467	HGDP00621	HGDP00987	HGDP00991	HGDP00992	HGDP01029	HGDP01032	HGDP01036
E	HG01882	NA19239	HG02771	NA19380	HG01250	NA19792	HG03054	HG03460	NA20362	NA20346
C	NA18974	NA19006	HG02381	HG03228	HG03593	HG03850	HG03867	HG04155	NA20889	NA21119
G	NA20870	HG02687	HG03577	NA12286	NA12546	NA12777	NA18549	NA19670	NA19747	NA20536
H	HG03600	HG03646	HG03738	HG04146	HG04161	NA21116	NA21126	HG03809	HG03872	HG03890
IJ	NA20762	NA11893	HG00186	NA11992	HG01197	NA12003	HG00181	HG01256	HG01672	HG01756
LT	HG02654	HG02792	HG03672	HG03686	HG03695	NA20861	NA20867	NA21109	NA21128	NA21135
N	HG00342	HG00369	HG00183	HG00185	HG00188	EGC617	EGC280	EGC139	EGC469	EGC602
O	HG00406	HG00442	HG00409	HG00583	HG02035	HG01816	HG00656	HG00631	HG00533	HG00436
Q	NA19732	NA19786	HG01923	HG01926	HG01950	NA19795	HG01944	HG02696	HG03652	HG03864
R	HG01586	HG03856	HG03978	HG04152	NA21105	EGC45	EGC341	EGC218	EGC184	EGC622
HGDP	Individual codes starting with HGDP - Mixed coverage
1000G	Individual codes starting with NA and HG0 - Low coverage
EGC	Individual codes starting with V - High coverage

## Sheet: 8. V110 Validation with dil
Supplementary Table 8. Haplogroup predictions in the validation set V110 individuals downsampled to different coverage.
	SNV inferred		Expected	M1W_50K model																					Expected	M21W_50K model																					Expected	M110W_50K model
ID	HG	Seq depth	HG	raw	1x		0.1x		0.05x		0.01x		0.005x		0.001x		0.0005x		0.0001x		0.00005x		0.00001x		HG	raw	1x		0.1x		0.05x		0.01x		0.005x		0.001x		0.0005x		0.0001x		0.00005x		0.00001x		HG	raw	1x
HGDP00453	B7	13.78	AB	IJ	IJ	IJ	IJ	IJ	IJ	IJ	IJ	IJ	IJ	IJ	IJ	O	H	O	O	O	H	H	H	N	AB	AB	AB	AB	AB	AB	AB	AB	AB	AB	AB	AB	AB	AB	AB	AB	AB	C	AB	AB	AB	C	AB	AB	AB
HGDP00462	B2-M6057	2.76	AB	AB	IJ	IJ	IJ	IJ	IJ	IJ	IJ	IJ	AB	IJ	H	H	O	O	H	O	G	AB	O	E	AB	AB	AB	AB	AB	AB	AB	AB	AB	AB	AB	AB	AB	AB	AB	AB	AB	AB	AB	H	G	E	AB	AB	AB
HGDP00478	B2-M6057	15.54	AB	IJ	AB	AB	IJ	IJ	IJ	IJ	IJ	IJ	IJ	IJ	H	H	IJ	AB	O	H	H	H	C	R	AB	AB	AB	AB	AB	AB	AB	AB	AB	AB	AB	AB	AB	AB	AB	AB	AB	AB	AB	E	C	C	AB	AB	AB
HGDP00479	B7	13.65	AB	IJ	IJ	IJ	IJ	IJ	IJ	IJ	IJ	IJ	IJ	H	H	H	IJ	IJ	O	AB	O	O	AB	H	AB	AB	AB	AB	AB	AB	AB	AB	AB	AB	AB	AB	AB	AB	AB	AB	AB	AB	H	C	C	IJ	AB	AB	AB
HGDP00621	B2-V75	15.49	AB	IJ	IJ	IJ	IJ	IJ	IJ	IJ	IJ	IJ	IJ	IJ	AB	H	O	AB	IJ	AB	G	C	G	AB	AB	AB	AB	AB	AB	AB	AB	AB	AB	AB	AB	AB	AB	AB	AB	AB	AB	O	AB	AB	H	AB	AB	AB	AB
HGDP00931	B6	14.28	AB	IJ	IJ	IJ	IJ	IJ	H	IJ	IJ	IJ	H	H	IJ	H	H	H	O	N	H	AB	H	N	AB	AB	AB	AB	AB	AB	AB	AB	AB	AB	AB	AB	AB	E	E	AB	G	E	R	O	AB	O	AB	AB	AB
HGDP00984	B4-M169	15.93	AB	IJ	IJ	IJ	IJ	IJ	IJ	IJ	IJ	IJ	H	IJ	H	H	O	H	AB	O	H	O	AB	O	AB	AB	AB	AB	AB	AB	AB	AB	AB	AB	AB	AB	AB	AB	AB	AB	AB	H	H	AB	E	AB	AB	AB	AB
HGDP00991	B5	2.41	AB	IJ	IJ	IJ	IJ	IJ	IJ	IJ	IJ	IJ	IJ	O	IJ	O	H	IJ	H	G	O	AB	O	G	AB	AB	AB	AB	AB	AB	AB	AB	AB	AB	AB	AB	AB	AB	AB	AB	IJ	AB	AB	AB	IJ	O	AB	AB	AB
HGDP01029	A2-M10833	29.89	AB	IJ	IJ	IJ	IJ	IJ	IJ	IJ	IJ	IJ	H	H	IJ	IJ	H	H	H	C	H	H	AB	O	AB	AB	AB	AB	AB	AB	AB	AB	AB	AB	AB	AB	AB	AB	AB	AB	AB	AB	AB	E	C	O	AB	AB	AB
HGDP01406	A3-PF17	13.46	AB	IJ	IJ	IJ	IJ	IJ	IJ	IJ	IJ	IJ	IJ	H	H	H	H	O	H	G	O	AB	O	H	AB	AB	AB	AB	AB	AB	AB	AB	AB	AB	AB	AB	AB	AB	AB	AB	AB	AB	C	AB	IJ	E	AB	AB	AB
HG01882	E4	3.67	E	E	IJ	IJ	IJ	IJ	IJ	IJ	IJ	IJ	IJ	IJ	H	IJ	H	H	IJ	O	O	O	H	H	E	E	E	E	E	E	E	E	E	E	E	E	E	E	E	E	E	C	E	E	O	O	E	E	E
NA19239	E4	1.72	E	E	IJ	E	IJ	IJ	IJ	IJ	E	IJ	E	IJ	H	E	E	E	G	O	H	O	O	R	E	E	E	E	E	E	E	E	E	E	E	E	E	E	E	E	E	E	E	E	E	E	E	E	E
HG02771	E3	3.8	E	IJ	IJ	IJ	IJ	IJ	IJ	IJ	IJ	IJ	IJ	IJ	H	IJ	O	H	H	O	O	H	H	O	E	E	E	E	E	E	E	E	E	E	E	E	E	E	E	E	E	E	O	H	C	AB	E	E	E
NA19380	E3	2.17	E	E	IJ	IJ	IJ	IJ	IJ	IJ	IJ	IJ	IJ	IJ	IJ	H	H	H	E	O	H	H	H	O	E	E	E	E	E	E	E	E	E	E	E	E	E	E	E	E	E	E	AB	C	E	E	E	E	E
HG01250	E2b	1.83	E	E	IJ	IJ	IJ	IJ	IJ	IJ	E	E	IJ	E	IJ	IJ	O	IJ	AB	H	O	O	O	E	E	E	E	E	E	E	E	E	E	E	E	E	E	E	E	E	E	E	E	IJ	E	R	E	E	E
NA19792	E2b	3.99	E	E	E	E	IJ	E	IJ	IJ	IJ	IJ	IJ	E	IJ	E	O	O	E	E	O	O	G	O	E	E	E	E	E	E	E	E	E	E	E	E	E	E	E	E	E	E	E	E	H	AB	E	E	E
HG03054	E1b	3.65	E	E	E	E	IJ	E	IJ	IJ	E	IJ	E	E	E	H	E	E	O	E	H	E	E	R	E	E	E	E	E	E	E	E	E	E	E	E	E	E	E	E	E	E	E	E	H	E	E	E	E
HG03460	E1b	3.33	E	E	E	E	E	IJ	E	E	IJ	IJ	H	E	E	H	E	E	G	O	E	H	O	N	E	E	E	E	E	E	E	E	E	E	E	E	E	E	E	E	E	E	R	E	E	E	E	E	E
NA20362	E1a1	2.45	E	E	E	E	E	E	E	IJ	E	E	IJ	E	E	E	E	E	E	E	O	O	C	N	E	E	E	E	E	E	E	E	E	E	E	E	E	E	E	E	E	E	G	E	E	C	E	E	E
NA20346	E1a2	1.81	E	E	E	E	E	E	E	E	IJ	E	E	E	E	E	E	E	H	E	O	AB	O	N	E	E	E	E	E	E	E	E	E	E	E	E	E	E	E	E	E	E	E	E	H	H	E	E	E
NA18974	C1	4.43	C	C	C	C	C	C	C	C	C	IJ	C	IJ	C	C	IJ	H	C	G	N	O	G	H	C	C	C	C	C	C	C	C	C	C	C	C	C	C	C	C	C	C	C	C	O	H	C	C	C
NA19006	C1	2.72	C	C	C	IJ	IJ	IJ	IJ	IJ	C	IJ	IJ	C	IJ	C	C	O	IJ	H	O	H	O	O	C	C	C	C	C	C	C	C	C	C	C	C	C	C	C	C	C	C	C	C	AB	AB	C	C	C
HG02381	C3	2.4	C	C	C	C	C	IJ	C	C	C	IJ	C	C	C	C	C	O	H	IJ	O	O	H	O	C	C	C	C	C	C	C	C	C	C	C	C	C	C	C	C	C	O	C	O	C	H	C	C	C
HG03228	C5a	3.11	C	IJ	IJ	IJ	IJ	IJ	IJ	IJ	IJ	H	O	C	O	IJ	O	O	O	O	O	H	N	O	C	C	C	C	C	C	C	C	C	C	C	C	C	C	C	C	H	H	C	C	Q	R	C	C	C
HG03593	C5a	2	C	C	IJ	C	IJ	IJ	IJ	IJ	IJ	IJ	IJ	C	C	C	IJ	C	O	H	G	H	H	O	C	C	C	C	C	C	C	C	C	C	C	C	C	C	C	C	C	C	R	H	C	H	C	C	C
HG03850	C5a	2.11	C	C	C	C	IJ	IJ	IJ	IJ	IJ	IJ	H	IJ	IJ	C	H	G	H	H	O	E	O	AB	C	C	C	C	C	C	C	C	C	C	C	C	C	C	C	C	C	C	C	C	G	C	C	C	C
HG03867	C5a	2.71	C	C	C	C	IJ	IJ	IJ	IJ	IJ	IJ	C	IJ	C	C	O	O	H	O	H	H	H	H	C	C	C	C	C	C	C	C	C	C	C	C	C	C	C	C	C	C	O	IJ	O	C	C	C	C
HG04155	C5a	2.25	C	C	C	IJ	IJ	IJ	IJ	IJ	IJ	IJ	C	C	H	C	H	C	O	H	R	H	O	H	C	C	C	C	C	C	C	C	C	C	C	C	C	C	C	C	C	C	C	O	O	H	C	C	C
NA20889	C5a	2.51	C	C	C	C	IJ	C	IJ	C	C	IJ	IJ	C	H	C	C	C	N	C	H	O	O	O	C	C	C	C	C	C	C	C	C	C	C	C	C	C	C	C	C	C	C	C	N	E	C	C	C
NA21119	C5a	3.73	C	C	C	C	C	C	IJ	C	IJ	IJ	C	C	IJ	H	C	C	H	N	C	C	O	H	C	C	C	C	C	C	C	C	C	C	C	C	C	C	C	C	C	C	C	H	AB	C	C	C	C
NA20870	G1	1.59	G	G	G	G	IJ	IJ	G	G	IJ	G	IJ	H	H	H	H	H	H	G	O	H	O	G	G	G	G	G	G	G	G	G	G	G	G	G	G	G	H	H	G	H	H	H	G	G	G	G	G
HG02687	G2a	4.01	G	G	G	G	G	G	G	IJ	IJ	H	IJ	G	G	G	G	O	G	H	G	O	H	G	G	G	G	G	G	G	G	G	G	G	G	G	G	G	G	G	G	H	G	G	O	IJ	G	G	G
HG03577	G2a	3.49	G	G	G	G	G	G	G	G	G	G	G	G	G	G	O	G	H	G	O	O	G	O	G	G	G	G	G	G	G	G	G	G	G	G	G	G	G	G	G	G	G	G	G	G	G	G	G
NA12286	G2a	2.69	G	G	G	G	G	G	G	G	G	G	G	G	G	G	O	G	G	H	G	H	O	H	G	G	G	G	G	G	G	G	G	G	G	G	G	G	G	G	G	G	G	G	G	O	G	G	G
NA12546	G2a	3.04	G	G	G	G	G	G	G	G	IJ	G	G	H	G	G	G	H	G	O	G	O	C	N	G	G	G	G	G	G	G	G	G	G	G	G	G	G	G	G	G	G	G	LT	G	G	G	G	G
NA12777	G2a	3.17	G	G	G	G	G	G	G	G	G	G	G	IJ	G	G	G	G	O	O	G	G	O	C	G	G	G	G	G	G	G	G	G	G	G	G	G	G	G	G	H	G	G	G	C	R	G	G	G
NA18549	G2a	2.81	G	G	G	G	G	G	G	G	G	G	G	G	G	G	G	H	O	H	H	H	G	N	G	G	G	G	O	O	G	G	G	G	G	G	G	G	G	H	G	G	O	O	O	O	G	G	G
NA19670	G2a	2.4	G	G	G	G	G	G	G	G	G	G	H	G	G	H	G	G	G	O	H	N	H	N	G	G	G	G	G	G	G	G	G	G	G	G	G	G	G	G	G	G	H	G	G	Q	G	G	G
NA19747	G2a	1.45	G	G	G	G	G	G	G	G	G	G	IJ	G	G	H	G	G	O	G	O	O	H	N	G	G	G	G	G	G	G	G	G	G	G	G	G	G	G	G	H	G	G	G	Q	C	G	G	G
NA20536	G2a	2.19	G	G	G	G	G	G	G	G	G	G	IJ	G	H	H	O	G	G	H	H	O	H	C	G	G	G	G	G	G	G	G	G	G	G	G	G	G	G	G	G	G	O	H	G	G	G	G	G
HG03600	H1a	3.14	H	H	H	H	H	H	H	H	H	H	H	H	H	IJ	H	H	H	O	O	O	AB	O	H	H	H	H	H	H	H	H	H	H	H	H	H	H	H	H	H	H	O	H	Q	H	H	H	H
HG03646	H1a	2.15	H	H	H	H	H	H	H	H	H	H	H	H	H	H	H	H	H	H	H	H	H	O	H	H	H	H	H	H	H	H	H	H	H	H	H	H	H	H	H	H	H	IJ	H	G	H	H	H
HG03738	H1a	2.28	H	H	H	H	H	H	H	H	H	H	H	H	H	H	H	H	H	H	R	R	H	H	H	H	H	H	H	H	H	H	H	H	H	H	H	H	H	H	H	H	H	H	Q	H	H	H	H
HG04146	H1a	2.17	H	H	H	H	H	H	H	H	H	H	IJ	H	H	H	O	H	H	H	H	H	H	H	H	H	H	H	H	H	H	H	H	H	H	H	H	H	H	H	H	H	G	H	R	R	H	H	H
HG04161	H1a	3.24	H	H	H	H	H	H	H	H	H	H	H	H	H	H	O	H	H	H	H	H	O	H	H	H	H	H	H	H	H	H	H	H	H	H	H	H	H	H	H	H	H	H	Q	H	H	H	H
NA21116	H1a	3.2	H	H	H	H	H	H	H	H	H	H	H	H	H	H	H	H	H	H	O	H	O	O	H	H	H	H	H	H	H	H	H	H	H	H	H	H	H	H	H	H	O	H	E	O	H	H	H
NA21126	H1a	3.94	H	H	H	H	H	H	H	H	IJ	IJ	H	H	H	H	H	H	H	H	R	H	H	H	H	H	H	H	H	H	H	H	H	H	H	H	H	H	H	H	H	H	H	H	H	H	H	H	H
HG03809	H1b	1.93	H	H	H	H	H	H	H	H	IJ	IJ	H	IJ	O	H	H	H	O	O	H	H	H	N	H	H	H	H	H	H	H	H	H	H	H	H	H	H	H	H	H	H	H	H	H	H	H	H	H
HG03872	H3	2.87	H	H	H	H	H	H	H	H	H	H	IJ	H	H	H	H	H	H	H	O	H	H	H	H	H	H	H	H	H	H	H	H	H	H	H	H	H	H	H	H	H	H	H	H	Q	H	H	H
HG03890	H3	2.76	H	H	H	H	H	H	H	H	H	H	H	H	H	H	H	H	H	N	O	IJ	H	O	H	H	H	H	H	H	H	H	H	H	H	H	H	H	H	H	H	H	H	H	H	H	H	H	H
NA20762	I1a	2.44	IJ	IJ	IJ	IJ	IJ	IJ	IJ	IJ	IJ	IJ	IJ	IJ	IJ	H	H	IJ	H	H	O	G	O	O	IJ	IJ	IJ	IJ	IJ	IJ	IJ	IJ	IJ	IJ	IJ	IJ	IJ	IJ	IJ	IJ	IJ	O	O	H	O	H	IJ	IJ	IJ
NA11893	I1c	2.33	IJ	IJ	IJ	IJ	IJ	IJ	IJ	IJ	IJ	IJ	IJ	IJ	IJ	IJ	H	IJ	H	IJ	IJ	O	O	C	IJ	IJ	IJ	IJ	IJ	IJ	IJ	IJ	IJ	IJ	IJ	IJ	IJ	IJ	IJ	IJ	IJ	H	IJ	IJ	E	Q	IJ	IJ	IJ
HG00186	I1d	1.54	IJ	IJ	IJ	IJ	IJ	IJ	IJ	IJ	IJ	IJ	IJ	IJ	IJ	IJ	IJ	IJ	H	H	IJ	H	E	IJ	IJ	IJ	IJ	IJ	IJ	IJ	IJ	IJ	IJ	IJ	IJ	IJ	IJ	IJ	IJ	IJ	IJ	H	IJ	H	E	IJ	IJ	IJ	IJ
NA11992	I1z	2.88	IJ	IJ	IJ	IJ	IJ	IJ	IJ	IJ	IJ	IJ	IJ	IJ	IJ	IJ	IJ	IJ	H	H	N	IJ	O	N	IJ	IJ	IJ	IJ	IJ	IJ	IJ	IJ	IJ	IJ	IJ	IJ	IJ	IJ	IJ	IJ	H	O	IJ	IJ	O	IJ	IJ	IJ	IJ
HG01197	I2b	2.56	IJ	IJ	IJ	IJ	IJ	IJ	IJ	IJ	IJ	IJ	IJ	IJ	IJ	IJ	H	IJ	IJ	O	H	O	O	H	IJ	IJ	IJ	IJ	IJ	IJ	IJ	IJ	IJ	IJ	IJ	IJ	IJ	IJ	IJ	IJ	H	H	H	IJ	C	IJ	IJ	IJ	IJ
NA12003	I2d	2.39	IJ	IJ	IJ	IJ	IJ	IJ	IJ	IJ	IJ	IJ	IJ	IJ	IJ	IJ	IJ	IJ	IJ	O	H	O	AB	O	IJ	IJ	IJ	IJ	IJ	IJ	IJ	IJ	IJ	IJ	IJ	IJ	IJ	IJ	IJ	IJ	H	IJ	O	H	O	IJ	IJ	IJ	IJ
HG00181	J1	3.23	IJ	IJ	IJ	IJ	IJ	IJ	IJ	IJ	IJ	IJ	IJ	IJ	IJ	IJ	H	IJ	AB	H	O	O	E	O	IJ	IJ	IJ	IJ	IJ	IJ	IJ	IJ	IJ	IJ	IJ	IJ	IJ	IJ	IJ	IJ	O	H	LT	O	AB	H	IJ	IJ	IJ
HG01256	J1	2.74	IJ	IJ	IJ	IJ	IJ	IJ	IJ	IJ	IJ	IJ	IJ	IJ	IJ	IJ	O	IJ	O	N	H	O	AB	N	IJ	IJ	IJ	IJ	IJ	IJ	IJ	IJ	IJ	IJ	IJ	IJ	IJ	IJ	IJ	IJ	H	G	IJ	H	AB	H	IJ	IJ	IJ
HG01672	J2a	1.39	IJ	IJ	IJ	IJ	IJ	IJ	IJ	IJ	IJ	IJ	IJ	IJ	IJ	IJ	H	IJ	IJ	IJ	O	AB	N	IJ	IJ	IJ	IJ	IJ	IJ	IJ	IJ	IJ	IJ	IJ	IJ	IJ	IJ	IJ	IJ	IJ	O	IJ	O	H	N	LT	IJ	IJ	IJ
HG01756	J2a	5.31	IJ	IJ	IJ	IJ	IJ	IJ	IJ	IJ	IJ	IJ	IJ	IJ	O	IJ	IJ	IJ	IJ	H	H	IJ	O	R	IJ	IJ	IJ	IJ	IJ	IJ	IJ	IJ	IJ	IJ	IJ	IJ	IJ	IJ	IJ	IJ	O	IJ	E	IJ	O	C	IJ	IJ	IJ
HG02654	L1a	3.87	LT	LT	IJ	IJ	IJ	IJ	IJ	IJ	IJ	LT	IJ	IJ	IJ	O	O	LT	O	O	O	N	AB	G	LT	LT	LT	LT	LT	LT	LT	LT	LT	LT	LT	LT	LT	LT	LT	LT	H	H	R	O	O	H	LT	LT	LT
HG02792	L1a	3.03	LT	LT	LT	LT	IJ	LT	IJ	IJ	IJ	IJ	IJ	IJ	IJ	LT	LT	O	O	O	O	IJ	O	O	LT	LT	LT	LT	LT	LT	LT	LT	LT	LT	LT	LT	LT	LT	LT	LT	LT	LT	O	O	H	IJ	LT	LT	LT
HG03672	L1a	2.36	LT	LT	LT	LT	LT	IJ	IJ	IJ	IJ	IJ	IJ	IJ	LT	H	O	LT	H	O	O	O	IJ	AB	LT	LT	LT	LT	LT	LT	LT	LT	LT	LT	LT	LT	LT	LT	LT	LT	O	O	O	H	AB	R	LT	LT	LT
HG03686	L1a	2.31	LT	LT	LT	LT	IJ	LT	LT	LT	LT	IJ	LT	LT	H	LT	O	LT	O	O	G	O	O	O	LT	LT	LT	LT	LT	LT	LT	LT	LT	LT	LT	LT	LT	LT	LT	LT	LT	O	O	Q	C	O	LT	LT	LT
HG03695	L1a	2.42	LT	LT	LT	LT	IJ	IJ	IJ	IJ	IJ	IJ	IJ	IJ	IJ	H	IJ	O	O	O	O	O	O	O	LT	LT	LT	LT	LT	LT	LT	LT	LT	LT	LT	LT	LT	LT	LT	LT	LT	LT	O	LT	IJ	O	LT	LT	LT
NA20861	L1a	1.77	LT	LT	IJ	IJ	IJ	IJ	IJ	IJ	LT	IJ	IJ	IJ	O	H	O	O	H	H	O	O	C	O	LT	LT	LT	LT	LT	LT	LT	LT	LT	LT	LT	LT	LT	LT	LT	LT	H	IJ	LT	IJ	E	IJ	LT	LT	LT
NA20867	L1a	2.26	LT	LT	LT	LT	LT	LT	IJ	LT	IJ	LT	IJ	LT	LT	LT	O	LT	IJ	O	O	N	C	C	LT	LT	LT	LT	LT	LT	LT	LT	LT	LT	LT	LT	LT	LT	LT	LT	G	LT	R	LT	O	R	LT	LT	LT
NA21109	L1a	2.13	LT	LT	LT	LT	IJ	LT	IJ	LT	IJ	IJ	LT	LT	H	IJ	LT	IJ	O	O	O	C	C	AB	LT	LT	LT	LT	LT	LT	LT	LT	LT	LT	LT	LT	LT	LT	LT	LT	LT	LT	H	G	O	AB	LT	LT	LT
NA21128	L1a	2.64	LT	LT	IJ	IJ	IJ	IJ	IJ	IJ	IJ	IJ	IJ	IJ	H	IJ	O	O	O	H	O	H	O	IJ	LT	LT	LT	LT	LT	LT	LT	LT	LT	LT	LT	LT	LT	LT	LT	LT	LT	O	O	LT	G	O	LT	LT	LT
NA21135	L1a	3.28	LT	LT	LT	LT	LT	LT	LT	LT	IJ	LT	LT	LT	LT	O	IJ	LT	O	O	R	O	R	O	LT	LT	LT	LT	LT	LT	LT	LT	LT	LT	LT	LT	LT	LT	LT	LT	LT	IJ	LT	LT	R	G	LT	LT	LT
HG00342	N3a3	2.18	N	IJ	IJ	N	IJ	IJ	N	N	IJ	N	N	IJ	N	N	O	O	N	N	G	R	H	H	N	N	N	N	N	N	N	N	N	N	N	N	N	N	N	N	N	O	N	N	N	N	N	N	N
HG00369	N3a3	1.81	N	IJ	N	N	N	IJ	IJ	IJ	N	N	N	N	N	N	O	O	O	O	N	N	O	O	N	N	N	N	N	N	N	N	N	N	N	N	N	N	N	N	N	H	N	N	R	O	N	N	N
HG00183	N3a4k	1.53	N	IJ	IJ	IJ	IJ	N	N	IJ	N	N	N	N	N	N	O	N	H	N	O	O	N	C	N	N	N	N	N	N	N	N	N	N	N	N	O	N	N	N	N	N	H	O	Q	H	N	N	N
HG00185	N3a4k	2.69	N	N	N	N	IJ	N	IJ	N	N	N	N	N	O	N	N	O	O	N	N	N	N	AB	N	N	N	N	N	N	N	N	N	N	N	N	N	N	N	O	H	O	N	N	H	H	N	N	N
HG00188	N3a4k	2.82	N	N	N	N	N	IJ	N	IJ	N	IJ	N	IJ	N	N	N	O	O	N	O	C	H	O	N	N	N	N	N	N	N	N	N	N	N	N	N	N	N	N	N	G	N	N	H	H	N	N	N
EGC617	N3a4	9.22	N	IJ	IJ	IJ	IJ	IJ	IJ	IJ	N	IJ	IJ	N	O	H	O	H	O	N	H	O	O	AB	N	N	N	N	N	N	N	N	N	N	N	N	N	N	N	N	O	H	N	N	H	E	N	N	N
EGC280	N3a3	14.3	N	IJ	IJ	IJ	IJ	IJ	IJ	IJ	IJ	IJ	IJ	IJ	N	IJ	IJ	H	O	O	O	H	IJ	N	N	N	N	N	N	N	N	N	N	N	N	N	N	N	N	O	N	N	N	O	G	N	N	N	N
EGC139	N3a3	8.32	N	IJ	IJ	IJ	IJ	IJ	IJ	IJ	IJ	IJ	IJ	IJ	IJ	IJ	O	O	O	N	G	H	O	O	N	N	N	N	N	N	N	N	N	N	N	N	N	N	O	N	N	O	O	G	IJ	N	N	N	N
EGC469	N3a3	13.95	N	IJ	N	N	N	N	N	IJ	IJ	N	IJ	IJ	IJ	H	H	N	N	N	O	H	N	O	N	N	N	N	N	N	N	N	N	N	N	N	N	N	N	N	O	N	O	N	LT	N	N	N	N
EGC602	N3a4	16.62	N	N	IJ	N	IJ	IJ	N	IJ	N	N	N	IJ	IJ	H	N	N	O	G	N	N	N	O	N	N	N	N	N	N	N	N	N	N	N	N	N	N	N	N	N	O	N	N	C	N	N	N	N
HG00406	O2	2.28	O	O	O	O	O	O	O	O	O	O	O	O	O	O	O	O	C	O	O	O	O	O	O	O	O	O	O	O	O	O	O	O	O	O	O	O	O	O	O	O	O	O	O	G	O	O	O
HG00442	O2a	4.03	O	O	O	O	O	O	O	O	O	O	O	O	O	O	O	O	O	O	O	H	H	O	O	O	O	O	O	O	O	O	O	O	O	O	O	O	O	O	O	O	O	G	H	Q	O	O	O
HG00409	O3a	3.69	O	O	O	O	O	O	O	O	O	O	O	O	O	O	O	O	O	O	N	O	O	O	O	O	O	O	O	O	O	O	O	O	O	O	O	O	O	O	O	O	O	O	G	O	O	O	O
HG00583	O3b	1.85	O	O	O	O	O	O	O	O	O	O	O	O	O	O	O	O	O	IJ	O	O	E	O	O	O	O	O	O	O	O	O	O	O	O	O	O	O	O	O	O	O	O	O	H	H	O	O	O
HG02035	O3f	2.12	O	O	O	O	O	O	O	O	O	O	O	O	O	O	O	O	O	O	O	O	O	O	O	O	O	O	O	O	O	O	O	O	O	O	O	O	O	O	O	O	Q	O	H	R	O	O	O
HG01816	O3g	2.02	O	O	O	O	O	O	O	O	O	O	O	O	O	O	O	O	O	O	O	O	O	O	O	O	O	O	O	O	O	O	O	O	O	O	O	O	O	O	O	O	O	O	O	C	O	O	O
HG00656	O3h	1.89	O	O	O	O	O	O	O	O	O	O	O	O	O	O	O	O	O	O	O	O	O	O	O	O	O	O	O	O	O	O	O	O	O	O	O	O	O	O	O	O	O	O	O	O	O	O	O
HG00631	O3j	3.95	O	O	O	O	O	O	O	O	IJ	O	O	O	IJ	IJ	O	O	O	O	C	O	E	C	O	O	O	O	O	O	O	O	O	O	O	O	O	O	O	IJ	O	O	O	O	R	Q	O	O	O
HG00533	O5	1.81	O	O	O	O	O	O	O	O	O	O	O	O	O	H	O	O	H	O	O	O	H	H	O	O	O	O	O	O	O	O	O	O	O	O	O	O	O	O	O	O	O	O	O	R	O	O	O
HG00436	O6	1.04	O	O	O	O	O	O	O	O	O	IJ	O	O	O	O	O	O	O	O	H	H	O	C	O	O	O	O	O	O	O	O	O	O	O	O	O	O	O	O	O	O	O	O	C	AB	O	O	O
NA19732	Q1	1.58	Q	Q	Q	Q	IJ	Q	IJ	IJ	H	IJ	IJ	IJ	Q	H	O	Q	O	H	H	O	O	O	Q	Q	Q	Q	Q	Q	Q	Q	Q	Q	Q	Q	Q	Q	Q	Q	Q	Q	O	Q	Q	O	Q	Q	Q
NA19786	Q1	1.52	Q	Q	IJ	Q	IJ	IJ	IJ	IJ	Q	Q	Q	IJ	H	H	H	H	O	O	Q	AB	O	Q	Q	Q	Q	Q	Q	Q	Q	Q	Q	Q	Q	Q	Q	Q	Q	Q	H	Q	O	H	Q	H	Q	Q	Q
HG01923	Q1a	2.51	Q	Q	Q	Q	Q	Q	Q	Q	IJ	Q	Q	Q	Q	Q	H	Q	Q	O	O	H	G	O	Q	Q	Q	Q	Q	Q	Q	Q	Q	Q	Q	Q	Q	Q	Q	Q	Q	Q	R	Q	C	IJ	Q	Q	Q
HG01926	Q1a	2.81	Q	IJ	IJ	IJ	IJ	IJ	IJ	IJ	Q	IJ	H	IJ	H	H	O	IJ	H	R	O	O	O	O	Q	Q	Q	Q	Q	Q	Q	Q	Q	Q	Q	Q	Q	Q	Q	H	R	R	O	R	R	AB	Q	Q	Q
HG01950	Q1a	2.28	Q	Q	IJ	IJ	IJ	IJ	Q	IJ	IJ	Q	IJ	Q	Q	H	IJ	H	R	G	H	N	C	R	Q	Q	Q	Q	Q	Q	Q	Q	Q	Q	Q	Q	Q	Q	Q	Q	Q	Q	R	Q	N	Q	Q	Q	Q
NA19795	Q1b	2.78	Q	Q	Q	IJ	IJ	IJ	IJ	IJ	Q	IJ	H	IJ	Q	H	H	O	H	Q	H	G	LT	Q	Q	Q	Q	Q	Q	Q	Q	Q	Q	Q	Q	Q	Q	Q	Q	Q	O	Q	R	H	R	R	Q	Q	Q
HG01944	Q2	3.28	Q	Q	Q	Q	IJ	IJ	IJ	IJ	Q	IJ	IJ	IJ	H	IJ	O	H	Q	O	O	H	O	O	Q	Q	Q	Q	Q	Q	Q	Q	Q	Q	Q	Q	Q	Q	H	Q	IJ	R	O	R	Q	H	Q	Q	Q
HG02696	Q2	4.04	Q	IJ	IJ	IJ	IJ	IJ	IJ	IJ	IJ	Q	IJ	IJ	R	O	O	H	H	H	IJ	H	C	O	Q	Q	Q	Q	Q	Q	Q	Q	Q	Q	Q	Q	Q	Q	Q	Q	R	R	R	Q	H	H	Q	Q	Q
HG03652	Q3	3.44	Q	IJ	IJ	IJ	IJ	IJ	IJ	IJ	IJ	IJ	IJ	IJ	H	IJ	IJ	H	O	O	H	R	H	IJ	Q	Q	Q	Q	Q	Q	Q	Q	Q	Q	Q	Q	R	Q	Q	Q	O	R	R	R	Q	H	Q	Q	Q
HG03864	Q3	5.25	Q	IJ	IJ	IJ	IJ	IJ	IJ	IJ	IJ	IJ	IJ	IJ	IJ	IJ	H	R	H	H	N	IJ	H	G	Q	Q	Q	Q	Q	Q	Q	Q	Q	Q	Q	Q	Q	Q	Q	Q	O	R	R	Q	O	C	Q	Q	Q
HG01586	R2	2.02	R	R	R	IJ	R	IJ	R	IJ	R	R	IJ	R	H	O	H	R	O	O	R	O	O	H	R	R	R	R	R	R	R	R	R	R	R	R	R	R	R	R	R	R	O	R	Q	H	R	R	R
HG03856	R2	2.34	R	R	R	R	R	R	R	R	R	IJ	R	R	IJ	R	R	H	R	H	O	O	E	O	R	R	R	R	R	R	R	R	R	R	R	R	R	R	R	R	H	LT	R	R	R	LT	R	R	R
HG03978	R2	4.11	R	IJ	IJ	IJ	IJ	IJ	IJ	IJ	IJ	IJ	R	IJ	R	H	H	O	H	O	O	H	O	N	R	R	R	R	R	R	R	R	R	R	R	R	R	R	R	H	R	R	IJ	O	O	O	R	R	R
HG04152	R2	3.06	R	R	R	R	R	IJ	R	R	IJ	R	R	IJ	R	R	R	O	R	H	R	R	O	N	R	R	R	R	R	R	R	R	R	R	R	R	R	R	Q	R	R	R	O	O	R	Q	R	R	R
NA21105	R2	2.68	R	R	R	R	R	R	R	R	R	R	R	R	R	H	R	H	H	O	O	H	H	O	R	R	R	R	R	R	R	R	R	R	R	R	R	R	R	R	R	R	R	R	E	O	R	R	R
EGC45	R1a1	9.17	R	IJ	IJ	IJ	IJ	IJ	IJ	IJ	IJ	IJ	IJ	IJ	R	O	H	IJ	IJ	O	O	O	C	H	R	R	R	R	R	R	R	R	R	R	R	R	R	R	R	R	R	H	O	R	AB	R	R	R	R
EGC341	R1a1	14.1	R	IJ	IJ	IJ	IJ	IJ	IJ	IJ	IJ	IJ	IJ	H	H	H	O	H	H	R	H	AB	R	O	R	R	R	R	R	R	R	R	R	R	R	R	R	R	R	R	R	R	R	O	AB	R	R	R	R
EGC218	R1a3	9.14	R	IJ	IJ	IJ	IJ	IJ	IJ	IJ	IJ	IJ	IJ	IJ	O	O	H	H	H	H	H	O	G	O	R	R	R	R	R	R	R	R	R	R	R	R	R	R	R	R	R	H	G	E	AB	O	R	R	R
EGC184	R1a1	12.68	R	IJ	IJ	IJ	IJ	IJ	IJ	IJ	IJ	IJ	H	IJ	H	H	IJ	H	O	C	G	O	AB	N	R	R	R	R	R	R	R	R	R	R	R	R	R	Q	H	R	R	R	O	AB	G	C	R	R	R
EGC622	R1a1	14.08	R	IJ	IJ	IJ	IJ	IJ	IJ	IJ	IJ	IJ	IJ	IJ	R	H	O	O	R	R	O	N	O	O	R	R	R	R	R	R	R	R	R	R	R	R	R	R	R	R	H	R	R	R	N	R	R	R	R
[truncated: 129 more columns]

## Sheet: 9. V110 Validation summary
Supplementary Table 9. Haplogroup prediction accuracy at different coverage ranges
Model	raw	1	0.1	0.05	0.01	0.005	0.001	0.0005	0.0001	0.00005	0.00001
M1W	0.745455	0.668182	0.518182	0.513636	0.509091	0.540909	0.527273	0.468182	0.345455	0.240909	0.204545
M21W	1	1	0.990909	1	1	1	0.981818	0.940909	0.704545	0.568182	0.295455
M110W	1	1	1	1	1	1	1	0.959091	0.845455	0.722727	0.340909
M21E	1	1	1	1	0.990385	1	0.961538	0.899038	0.673077	0.495192	0.206731
M213E	1	1	1	1	1	0.995192	0.980769	0.951923	0.826923	0.711538	0.283654
M21NE	0.961538	0.961538	0.961538	0.961538	0.951923	0.942308	0.894231	0.884615	0.682692	0.480769	0.211538
M213NE	0.903846	0.903846	0.894231	0.903846	0.913462	0.884615	0.894231	0.865385	0.721154	0.471154	0.201923
Note, shown accuracy estimates are based on results reported in Table S10

## Sheet: 10. 1000GP validation
Supplementary Table10. Haplogroup prediction validation in 1000 Genomes Project data
	SNV inferred		Expected	M1W_50K model											Expected	M21W_50K model											Expected	M110W_50K model											Expected	M21E_50K model
ID	HG	Seq depth	HG	raw	1x	0.1x	0.05x	0.01x	0.005x	0.001x	0.0005x	0.0001x	0.00005x	0.00001x	HG	raw	1x	0.1x	0.05x	0.01x	0.005x	0.001x	0.0005x	0.0001x	0.00005x	0.00001x	HG	raw	1x	0.1x	0.05x	0.01x	0.005x	0.001x	0.0005x	0.0001x	0.00005x	0.00001x	HG	raw	1x	0.1x	0.05x	0.01x	0.005x	0.001x	0.0005x	0.0001x	0.00005x
HG01890	A0	5.03984	AB	AB	AB	AB	AB	AB	H	AB	H	AB	AB	O	AB	AB	AB	AB	AB	AB	AB	AB	AB	AB	AB	LT	AB	AB	AB	AB	AB	AB	AB	AB	AB	AB	C	E	AB	AB	AB	AB	AB	AB	AB	AB	AB	AB	AB
HG02982	A0	3.14868	AB	AB	AB	AB	AB	AB	IJ	O	AB	H	AB	H	AB	AB	AB	AB	AB	AB	AB	AB	AB	AB	AB	AB	AB	AB	AB	AB	AB	AB	AB	AB	AB	AB	AB	AB	AB	AB	AB	AB	AB	AB	AB	AB	AB	AB	AB
HG02613	A1	3.42158	AB	AB	AB	AB	AB	IJ	IJ	H	H	H	AB	H	AB	AB	AB	AB	AB	AB	AB	AB	AB	AB	C	Q	AB	AB	AB	AB	AB	AB	AB	AB	AB	AB	AB	H	AB	AB	AB	AB	AB	AB	AB	AB	AB	AB	AB
HG02645	A1	3.88036	AB	AB	AB	AB	AB	AB	IJ	AB	AB	AB	H	H	AB	AB	AB	AB	AB	AB	AB	AB	AB	AB	AB	H	AB	AB	AB	AB	AB	AB	AB	AB	AB	AB	H	G	AB	AB	AB	AB	AB	AB	AB	AB	AB	AB	AB
HG02666	A1	3.91467	AB	AB	AB	AB	IJ	IJ	IJ	AB	AB	O	AB	O	AB	AB	AB	AB	AB	AB	AB	AB	AB	AB	AB	AB	AB	AB	AB	AB	AB	AB	AB	AB	AB	AB	AB	C	AB	AB	AB	AB	AB	AB	AB	AB	AB	AB	AB
HG00553	B	1.24286	AB	AB	AB	AB	IJ	IJ	AB	O	O	N	E	E	AB	AB	AB	AB	AB	AB	AB	AB	AB	AB	AB	R	AB	AB	AB	AB	AB	AB	AB	AB	AB	AB	O	O	AB	AB	AB	AB	AB	AB	AB	AB	AB	AB	AB
HG03225	B	2.3263	AB	AB	AB	IJ	AB	AB	IJ	H	H	N	O	N	AB	AB	AB	AB	AB	AB	AB	AB	AB	AB	O	H	AB	AB	AB	AB	AB	AB	AB	AB	AB	AB	AB	E	AB	AB	AB	AB	AB	AB	AB	AB	AB	AB	AB
HG03376	B	1.68609	AB	AB	AB	AB	IJ	IJ	AB	O	O	AB	H	O	AB												AB	AB	AB	AB	AB	AB	AB	AB	AB	AB	AB	AB	AB	AB	AB	AB	AB	AB	AB	AB	AB	AB	AB
NA19043	B	3.29124	AB	AB	AB	IJ	AB	AB	IJ	AB	H	AB	AB	H	AB	AB	AB	AB	AB	AB	AB	AB	AB	AB	AB	AB	AB	AB	AB	AB	AB	AB	AB	AB	AB	C	LT	AB	AB	AB	AB	AB	AB	AB	AB	AB	AB	AB	AB
NA19384	B	2.01418	AB	AB	AB	IJ	IJ	IJ	AB	IJ	H	H	H	H	AB	AB	AB	AB	AB	AB	AB	AB	AB	AB	AB	C	AB	AB	AB	AB	AB	AB	AB	AB	AB	AB	AB	R	AB	AB	AB	AB	AB	AB	AB	AB	AB	AB	AB
NA19454	B	3.899	AB	AB	AB	IJ	IJ	IJ	H	O	AB	H	G	AB	AB	AB	AB	AB	AB	AB	AB	AB	AB	AB	O	R	AB	AB	AB	AB	AB	AB	AB	AB	AB	AB	AB	LT	AB	AB	AB	AB	AB	AB	AB	AB	AB	AB	AB
HG02588	B	3.8957	AB	AB	AB	IJ	IJ	H	IJ	O	O	O	O	N	AB												AB	AB	AB	AB	AB	AB	AB	AB	AB	AB	H	N	AB	AB	AB	AB	AB	AB	AB	AB	AB	H	E2
NA18971	C1	4.35464	C	C	C	C	C	C	C	C	N	O	O	H	C	C	C	C	C	C	C	C	C	C	O	C	C	C	C	C	C	C	C	C	C	C	C	H	C	C	C	C	C	C	C	C	C	C	C
NA18974	C1	4.42708	C	C	C	C	C	IJ	C	O	C	O	O	H	C	C	C	C	C	C	C	C	C	C	C	AB	C	C	C	C	C	C	C	C	C	C	H	H	C	C	C	C	C	C	C	C	C	C	G
NA18989	C1	3.6834	C	IJ	IJ	IJ	IJ	IJ	IJ	H	H	N	O	N	C	C	C	C	C	C	C	C	C	C	H	C	C	C	C	C	C	C	C	C	C	H	H	H	C	C	C	C	C	C	C	C	C	C	C
NA19006	C1	2.71212	C	C	C	IJ	IJ	C	H	H	C	E	O	N	C	C	C	C	C	C	C	C	C	C	C	C	C	C	C	C	C	C	C	C	C	C	O	LT	C	C	C	C	C	C	C	C	C	C	LT
HG00628	C3	1.65259	C	C	IJ	IJ	IJ	IJ	C	C	O	H	H	AB	C	C	C	C	C	C	C	C	C	C	H	G	C	C	C	C	C	C	C	C	C	C	R	H	C	C	C	C	C	C	C	C	C	C	O25
HG02141	C3	3.67727	C	C	C	C	C	IJ	IJ	C	C	O	G	O	C	C	C	C	C	C	C	C	C	C	C	C	C	C	C	C	C	C	C	C	C	C	C	O	C	C	C	C	C	C	C	C	C	C	C
HG02373	C3	2.4901	C	C	C	C	C	C	IJ	IJ	C	C	C	G	C	C	C	C	C	C	C	C	C	C	C	H	C	C	C	C	C	C	C	C	C	C	C	E	C	C	C	C	C	C	C	C	C	C	C
HG02381	C3	2.40105	C	C	C	C	C	C	C	C	O	O	H	R	C												C	C	C	C	C	C	C	C	C	C	C	LT	C	C	C	C	C	C	C	C	C	C	C
HG03917	C3	2.4305	C	C	C	C	C	IJ	IJ	H	O	O	H	Q	C	C	C	C	C	C	C	C	C	C	C	C	C	C	C	C	C	C	C	C	C	C	C	C	C	C	C	C	C	C	C	C	C	C	C
NA18612	C3	3.47679	C	C	C	IJ	IJ	IJ	IJ	H	O	H	H	H	C	C	C	C	C	C	C	C	C	C	C	C	C	C	C	C	C	C	C	C	C	C	O	C	C	C	C	C	C	C	C	C	C	LT	C
NA18620	C3	3.07818	C	C	C	IJ	IJ	IJ	IJ	H	H	O	O	O	C	C	C	C	C	C	C	C	C	C	C	H	C	C	C	C	C	C	C	C	C	C	C	E	C	C	C	C	C	C	C	C	C	C	C
NA18749	C3	3.42311	C	C	C	IJ	IJ	IJ	C	IJ	O	IJ	G	H	C	C	C	C	C	C	C	C	C	C	C	C	C	C	C	C	C	C	C	C	C	C	C	E	C	C	C	C	C	C	C	C	C	C	C
NA19079	C3	1.93873	C	IJ	IJ	IJ	IJ	IJ	IJ	IJ	C	O	O	O	C	C	C	C	C	C	C	C	C	C	E	O	C	C	C	C	C	C	C	C	C	C	O	LT	C	C	C	C	C	C	C	C	C	H	O6
NA19091	C3	2.76437	C	C	C	C	C	C	IJ	IJ	C	H	H	H	C	C	C	C	C	C	C	C	C	C	H	C	C	C	C	C	C	C	C	C	C	C	C	C	C	C	C	C	C	C	C	C	C	C	E2
HG03228	C5a	3.10739	C	C	IJ	IJ	IJ	IJ	C	O	C	H	O	AB	C	C	C	C	C	C	C	C	C	C	C	H	C	C	C	C	C	C	C	C	C	C	C	G	C	C	C	C	C	C	C	C	C	C	I2
HG03593	C5a	1.99289	C	C	C	C	IJ	C	H	IJ	C	H	C	O	C	C	C	C	C	C	C	C	C	H	C	C	C	C	C	C	C	C	C	C	C	C	C	H	C	C	C	C	C	C	C	C	C	C	H
HG03850	C5a	2.10197	C	C	C	IJ	IJ	IJ	IJ	H	H	C	C	O	C	C	C	C	C	C	C	C	C	C	C	C	C	C	C	C	C	C	C	C	C	C	C	C	C	C	C	C	C	C	C	C	C	C	C
HG03867	C5a	2.70086	C	C	C	IJ	IJ	IJ	H	H	C	O	C	H	C	C	C	C	C	C	C	C	C	C	G	AB	C	C	C	C	C	C	C	C	C	C	G	E	C	C	C	C	C	C	C	C	C	C	C
HG04155	C5a	2.24555	C	C	C	IJ	IJ	C	IJ	C	O	O	O	AB	C												C	C	C	C	C	C	C	C	C	E	C	N	C	C	C	C	C	C	C	C	C	C	H
NA20889	C5a	2.50263	C	C	C	IJ	IJ	C	C	C	C	E	H	N	C	C	C	C	C	C	C	C	C	H	C	C	C	C	C	C	C	C	C	C	C	C	C	E	C	C	C	C	C	C	C	C	C	C	C
NA20911	C5a	2.99438	C	C	C	IJ	IJ	C	IJ	C	H	O	O	O	C	C	C	C	C	C	C	C	C	C	C	C	C	C	C	C	C	C	C	C	C	C	C	H	C	C	C	C	C	C	C	C	C	C	H
NA21091	C5a	1.79421	C	C	C	IJ	IJ	C	IJ	IJ	O	H	H	IJ	C	C	C	C	C	C	C	C	C	C	C	AB	C	C	C	C	C	C	C	C	C	C	C	AB	C	C	C	C	C	C	C	C	C	C	C
NA21094	C5a	1.70709	C	C	C	IJ	C	IJ	C	H	H	O	H	H	C	C	C	C	C	C	C	C	C	C	C	H	C	C	C	C	C	C	C	C	C	C	C	H	C	C	C	C	C	C	C	C	C	C	C
NA21100	C5a	2.31956	C	C	C	C	C	C	C	O	C	H	N	H	C	C	C	C	C	C	C	C	C	C	O	O	C	C	C	C	C	C	C	C	C	C	AB	G	C	C	C	C	C	C	C	C	C	C	E2
NA21117	C5a	3.02716	C	C	C	IJ	IJ	IJ	C	H	H	H	H	R	C	C	C	C	C	C	C	C	C	C	C	AB	C	C	C	C	C	C	C	C	C	C	C	C	C	C	C	C	C	C	C	C	C	C	C
NA21118	C5a	3.01502	C	C	C	C	IJ	C	IJ	IJ	H	O	H	O	C	C	C	C	C	C	C	C	C	Q	C	C	C	C	C	C	C	C	C	C	C	C	C	O	C	C	C	C	C	C	C	C	C	C	C
NA21119	C5a	3.7252	C	C	C	C	IJ	C	IJ	C	O	IJ	N	O	C	C	C	C	C	C	C	C	C	C	C	C	C	C	C	C	C	C	C	C	C	C	C	R	C	C	C	C	C	C	C	C	C	C	C
NA21123	C5a	1.13667	C	C	C	IJ	C	H	C	O	O	O	O	H	C	C	C	C	C	C	C	C	C	C	O	O	C	C	C	C	C	C	C	C	C	C	C	R	C	C	C	C	C	C	C	C	C	C	C
NA21124	C5a	3.23048	C	C	IJ	IJ	IJ	IJ	IJ	O	C	O	N	C	C	C	C	C	C	C	C	C	C	C	C	H	C	C	C	C	C	C	C	C	C	LT	H	R	C	C	C	C	C	C	C	C	C	C	R2
NA21127	C5a	1.79405	C	C	C	C	C	C	C	C	H	H	H	H	C	C	C	C	C	C	C	C	C	C	H	Q	C	C	C	C	C	C	C	C	C	C	C	O	C	C	C	C	C	C	C	C	C	C	C
NA21133	C5a	2.96517	C	C	C	IJ	IJ	IJ	C	H	H	G	O	H	C	C	C	C	C	C	C	C	C	C	C	H	C	C	C	C	C	C	C	C	C	C	C	H	C	C	C	C	C	C	C	C	C	C	C
NA18940	D2	2.2642	NA												NA												NA												NA
NA18944	D2	2.06374	NA												NA												NA												NA
NA18948	D2	1.89065	NA												NA												NA												NA
NA18952	D2	2.38704	NA												NA												NA												NA
NA18960	D2		NA												NA												NA												NA
NA18961	D2	1.30157	NA												NA												NA												NA
NA18966	D2	3.08385	NA												NA												NA												NA
NA18967	D2	1.92547	NA												NA												NA												NA
NA18970	D2	1.97338	NA												NA												NA												NA
NA18983	D2	3.12256	NA												NA												NA												NA
NA18988	D2	4.76341	NA												NA												NA												NA
NA18995	D2	2.49038	NA												NA												NA												NA
NA19004	D2	3.49639	NA												NA												NA												NA
NA19012	D2	1.88034	NA												NA												NA												NA
NA19056	D2	1.82405	NA												NA												NA												NA
NA19058	D2	1.98375	NA												NA												NA												NA
NA19063	D2	2.22616	NA												NA												NA												NA
NA19068	D2	4.14555	NA												NA												NA												NA
NA19082	D2	1.53385	NA												NA												NA												NA
NA19089	D2	2.81594	NA												NA												NA												NA
HG02756	E1a	3.80851	E	E	IJ	IJ	IJ	IJ	IJ	H	H	O	G	H	E	E	E	E	E	E	E	E	E	E	H	H	E	E	E	E	E	E	E	E	E	E	E	AB	E1	E1	E1	E1	E1	E1	E1	E1	E1	E2	H
HG02804	E1a	4.17738	E	E	E	IJ	IJ	IJ	E	H	H	C	H	E	E	E	E	E	E	E	E	E	E	E	E	E	E	E	E	E	E	E	E	E	E	E	C	AB	E1	E1	E1	E1	E1	E1	E1	E1	E1	E1	E1
NA19900	E1a	3.53504	E	E	E	IJ	IJ	IJ	H	E	H	E	G	E	E												E	E	E	E	E	E	E	E	E	H	E	O	E1	E1	E1	E1	E1	E1	E1	E2	E1	E1	E1
HG01187	E1a1	3.34176	E	IJ	IJ	IJ	IJ	IJ	IJ	IJ	O	H	H	G	E	E	E	E	E	E	E	E	E	E	E	E	E	E	E	E	E	E	E	E	E	E	C	E	E1	E1	E1	E1	E1	E1	E1	E1	E1	E1	E1
HG01302	E1a1	2.1082	E	E	E	E	IJ	IJ	IJ	E	E	H	C	O	E	E	E	E	E	E	E	E	E	E	E	H	E	E	E	E	E	E	E	E	E	E	E	E	E1	E1	E1	E1	E1	E1	E1	E1	E1	H	E1
HG01305	E1a1	1.95703	E	E	E	E	E	IJ	IJ	E	IJ	O	E	E	E	E	E	E	E	E	E	E	E	E	E	E	E	E	E	E	E	E	E	E	E	E	E	LT	E1	E1	E1	E1	E1	E1	E1	E1	E1	E1	E1
HG01556	E1a1	3.51643	E	E	E	E	IJ	E	IJ	H	O	H	H	O	E	E	E	E	E	E	E	E	E	E	E	E	E	E	E	E	E	E	E	E	E	E	E	C	E1	E1	E1	E1	E1	E1	E1	E1	E1	E2	E1
HG01986	E1a1	2.38628	E	E	E	E	E	E	E	E	E	E	E	O	E												E	E	E	E	E	E	E	E	E	E	E	AB	E1	E1	E1	E1	E1	E1	E1	E1	E1	E1	E1
HG01990	E1a1	2.97884	E	E	E	E	E	E	H	E	H	O	E	E	E												E	E	E	E	E	E	E	E	E	E	E	E	E1	E1	E1	E1	E1	E1	E1	E1	E1	H	E1
HG02009	E1a1	5.6212	E	E	E	E	IJ	E	E	E	O	O	H	O	E	E	E	E	E	E	E	E	E	E	E	C	E	E	E	E	E	E	E	E	E	E	E	H	E1	E1	E1	E1	E1	E1	E1	E1	E1	E1	E1
HG02013	E1a1	2.36095	E	E	E	E	E	E	E	E	E	O	H	E	E	E	E	E	E	E	E	E	E	E	E	E	E	E	E	E	E	E	E	E	E	E	E	AB	E1	E1	E1	E1	E1	E1	E1	E1	E1	E2	E1
HG02107	E1a1	14.1608	E	IJ	IJ	IJ	IJ	IJ	IJ	H	IJ	O	E	N	E												E	E	E	E	E	E	E	E	E	E	E	G	E1	E1	E1	E1	E1	E1	E1	E1	E2	E2	C
HG02255	E1a1	1.58232	E	E	E	IJ	IJ	IJ	E	H	E	O	O	R	E	E	E	E	E	E	E	E	E	E	E	E	E	E	E	E	E	E	E	E	E	E	E	E	E1	E1	E1	E1	E1	E1	E1	E1	E1	E1	E1
HG02283	E1a1	6.45338	E	E	E	IJ	E	IJ	IJ	H	R	E	E	H	E	E	E	E	E	E	E	E	E	E	E	O	E	E	E	E	E	E	E	E	E	E	E	LT	E1	E1	E1	E1	E1	E1	E1	E1	E2	E2	E1
HG02284	E1a1	4.525	E	IJ	IJ	IJ	IJ	E	H	IJ	O	H	O	H	E	E	E	E	E	E	E	E	E	E	E	E	E	E	E	E	E	E	E	E	E	H	E	G	E1	E1	E1	E1	E1	E1	E1	E1	E1	E1	J2
HG02307	E1a1	2.13148	E	E	E	E	IJ	IJ	E	O	H	G	O	O	E	E	E	E	E	E	E	E	E	E	E	G	E	E	E	E	E	E	E	E	E	E	E	IJ	E1	E1	E1	E1	E1	E1	E1	E1	E1	E1	R1b
HG02323	E1a1	2.13978	E	E	E	E	E	E	E	H	O	N	E	O	E	E	E	E	E	E	E	E	E	E	E	E	E	E	E	E	E	E	E	E	E	E	C	E	E1	E1	E1	E1	E1	E1	E1	E1	E1	E1	H
HG02334	E1a1	2.23426	E	E	E	E	IJ	IJ	IJ	H	E	E	O	O	E	E	E	E	E	E	E	E	E	E	H	C	E	E	E	E	E	E	E	E	E	E	E	O	E1	E1	E1	E1	E1	E1	E1	E1	E2	E1	H
HG02429	E1a1	4.09846	E	E	E	IJ	IJ	IJ	E	E	E	O	H	AB	E	E	E	E	E	E	E	E	E	E	E	H	E	E	E	E	E	E	E	E	E	E	E	IJ	E1	E1	E1	E1	E1	E1	E1	E1	E1	H	E1
HG02442	E1a1	1.47012	E	E	E	E	E	E	E	H	E	H	N	H	E	E	E	E	E	E	E	E	E	E	E	E	E	E	E	E	E	E	E	E	E	E	E	O	E1	E1	E1	E1	E1	E1	E1	E2	E1	E1	R1a
HG02464	E1a1	3.7769	E	E	E	E	E	IJ	E	H	O	H	O	E	E												E	E	E	E	E	E	E	E	E	E	G	H	E1	E1	E1	E1	E1	E1	E1	E1	E1	E1	AB
HG02481	E1a1	2.69304	E	E	E	E	E	E	IJ	H	H	O	N	O	E	E	E	E	E	E	E	E	E	E	E	E	E	E	E	E	E	E	E	E	E	E	E	G	E1	E1	E1	E1	E1	E1	E1	E1	E1	E1	R1b
HG02484	E1a1	4.34628	E	E	E	E	E	IJ	IJ	IJ	H	O	R	O	E	E	E	E	E	E	E	E	E	E	E	O	E	E	E	E	E	E	E	E	E	E	E	C	E1	E1	E1	E1	E1	E1	E1	E1	E1	E1	E1
HG02489	E1a1	2.37315	E	E	E	E	E	E	H	E	O	E	AB	H	E	E	E	E	E	E	E	E	E	E	E	E	E	E	E	E	E	E	E	E	E	E	C	AB	E1	E1	E1	E1	E1	E1	E1	E1	E1	E1	E1
HG02496	E1a1	2.55071	E	E	E	IJ	IJ	IJ	E	E	E	H	E	E	E	E	E	E	E	E	E	E	E	E	E	R	E	E	E	E	E	E	E	E	E	E	H	E	E1	E1	E1	E1	E1	E1	E1	E1	E1	E1	E1
HG02561	E1a1	3.27938	E	E	IJ	IJ	IJ	IJ	IJ	H	O	H	E	E	E	E	E	E	E	E	E	E	E	E	E	C	E	E	E	E	E	E	E	E	E	H	E	G	E1	E1	E1	E1	E1	E1	E1	E1	E1	E1	AB
HG02573	E1a1	3.74339	E	E	E	IJ	IJ	H	H	H	N	H	H	E	E	E	E	E	E	E	E	E	E	E	E	E	E	E	E	E	E	E	E	E	E	H	E	E	E1	E1	E1	E1	E1	E1	E1	E1	E1	E1	E1
HG02582	E1a1	4.0958	E	E	E	IJ	IJ	H	E	O	H	E	O	O	E	E	E	E	E	E	E	E	E	E	E	C	E	E	E	E	E	E	E	E	E	E	H	AB	E1	E1	E1	E1	E1	E1	E1	E1	E2	E1	I1
HG02585	E1a1	4.32514	E	E	E	IJ	IJ	IJ	IJ	H	H	E	O	O	E												E	E	E	E	E	E	E	E	E	E	E	E	E1	E1	E1	E1	E1	E1	E1	E1	E1	E1	E2
HG02620	E1a1	3.62664	E	E	E	IJ	IJ	E	IJ	H	O	H	G	H	E												E	E	E	E	E	E	E	E	E	E	IJ	E	E1	E1	E1	E1	E1	E1	E1	E1	E1	LT	E1
HG02642	E1a1	3.53631	E	E	E	IJ	E	IJ	IJ	E	IJ	E	E	H	E	E	E	E	E	E	E	E	E	E	E	O	E	E	E	E	E	E	E	E	E	E	G	E	E1	E1	E1	E1	E1	E1	E1	E1	E1	E1	O25
HG02675	E1a1	3.4921	E	E	E	IJ	IJ	E	IJ	E	E	H	H	LT	E	E	E	E	E	E	E	E	E	C	E	E	E	E	E	E	E	E	E	E	E	E	E	R	E1	E1	E1	E1	E1	E1	E1	E1	E1	E1	E1
HG02678	E1a1	3.82755	E	E	E	IJ	E	E	E	H	H	O	E	C	E	E	E	E	E	E	E	E	E	E	E	O	E	E	E	E	E	E	E	E	E	E	E	E	E1	E1	E1	E1	E1	E1	E1	E1	E1	E1	E2
HG02702	E1a1	3.61087	E	E	E	IJ	IJ	E	IJ	IJ	H	O	O	C	E												E	E	E	E	E	E	E	E	E	E	E	E	E1	E1	E1	E1	E1	E1	E1	E1	E1	E1	AB
HG02715	E1a1	3.60685	E	E	E	IJ	IJ	E	E	O	O	E	G	N	E												E	E	E	E	E	E	E	E	E	E	E	Q	E1	E1	E1	E1	E1	E1	E1	E1	E1	E1	E4
HG02759	E1a1	3.0299	E	E	E	E	E	E	E	O	H	H	O	O	E	E	E	E	E	E	E	E	E	E	E	G	E	E	E	E	E	E	E	E	E	E	E	E	E1	E1	E1	E1	E1	E1	E1	E1	E1	E1	E1
HG02813	E1a1	2.2487	E	E	E	E	E	IJ	E	H	E	H	N	H	E	E	E	E	E	E	E	E	E	E	IJ	C	E	E	E	E	E	E	E	E	E	E	E	H	E1	E1	E1	E1	E1	E1	E1	E1	E1	E1	E1
HG02816	E1a1	2.02244	E	E	E	E	E	E	E	E	E	O	E	O	E	E	E	E	E	E	E	E	E	E	E	R	E	E	E	E	E	E	E	E	E	E	E	E	E1	E1	E1	E1	E1	E1	E1	E1	E1	E1	E1
HG02836	E1a1	2.22499	E	E	E	E	E	E	H	E	E	H	E	E	E	E	E	E	E	E	E	E	E	E	E	LT	E	E	E	E	E	E	E	E	E	E	E	H	E1	E1	E1	E1	E1	E1	E1	E1	E1	E1	E1
HG02851	E1a1	2.23602	E	E	E	E	E	IJ	IJ	E	E	O	O	O	E	E	E	E	E	E	E	E	E	E	E	IJ	E	E	E	E	E	E	E	E	E	E	E	AB	E1	E1	E1	E1	E1	E1	E1	E1	E1	E1	E1
HG02854	E1a1	2.27309	E	E	E	IJ	E	IJ	IJ	O	H	H	O	H	E												E	E	E	E	E	E	E	E	E	E	H	E	E1	E1	E1	E1	E1	E1	E1	E1	E1	E1	C
HG02860	E1a1	2.43297	E	E	E	E	E	IJ	E	H	H	H	H	O	E	E	E	E	E	E	E	E	E	E	E	Q	E	E	E	E	E	E	E	E	E	E	E	E	E1	E1	E1	E1	E1	E1	E1	E1	E1	E1	E1
HG02887	E1a1	2.21708	E	E	E	E	E	E	E	IJ	E	O	C	AB	E												E	E	E	E	E	E	E	E	E	E	E	E	E1	E1	E1	E1	E1	E1	E1	E1	E1	E1	E1
HG02890	E1a1	2.81416	E	E	E	E	E	E	IJ	O	E	IJ	G	O	E	E	E	E	E	E	E	E	E	E	O	E	E	E	E	E	E	E	E	E	E	E	E	E	E1	E1	E1	E1	E1	E1	E1	E1	E1	E1	E1
HG02878	E1a1	2.00957	E	E	E	E	E	E	E	E	E	O	H	H	E	E	E	E	E	E	E	E	E	E	E	LT	E	E	E	E	E	E	E	E	E	E	E	Q	E1	E1	E1	E1	E1	E1	E1	E1	E1	E1	R2
NA19726	E1a1	2.10132	E	E	E	E	E	IJ	IJ	E	E	O	E	E	E	E	E	E	E	E	E	E	E	E	E	C	E	E	E	E	E	E	E	E	E	E	E	G	E1	E1	E1	E1	E1	E1	E1	E1	E1	E1	E1
HG02944	E1a1	3.72891	E	E	IJ	IJ	IJ	H	E	H	E	H	N	H	E	E	E	E	E	E	E	E	E	C	E	R	E	E	E	E	E	E	E	E	E	E	E	H	E1	E1	E1	E1	E1	E1	E1	E1	E1	E1	H
HG02947	E1a1	3.15953	E	E	E	E	E	E	E	E	H	O	O	AB	E												E	E	E	E	E	E	E	E	E	E	E	H	E1	E1	E1	E1	E1	E1	E1	E1	E1	E1	E4
HG02971	E1a1	1.72625	E	E	E	E	E	IJ	E	E	IJ	E	E	O	E	E	E	E	E	E	E	E	E	E	E	O	E	E	E	E	E	E	E	E	E	E	E	E	E1	E1	E1	E1	E1	E1	E1	E1	E1	C	R1b
HG02977	E1a1	3.07599	E	E	E	E	E	IJ	IJ	H	H	O	E	O	E	E	E	E	E	E	E	E	E	E	E	E	E	E	E	E	E	E	E	E	E	E	E	E	E1	E1	E1	E1	E1	E1	E1	E1	E1	E1	E1
HG02981	E1a1	2.66406	E	E	E	E	E	E	E	E	IJ	E	O	N	E	E	E	E	E	E	E	E	E	E	R	N	E	E	E	E	E	E	E	E	E	E	E	H	E1	E1	E1	E1	E1	E1	E1	E1	E1	E1	E1
HG03039	E1a1	3.82909	E	E	E	E	E	IJ	E	O	O	IJ	H	O	E	E	E	E	E	E	E	E	E	E	C	E	E	E	E	E	E	E	E	E	E	E	E	Q	E1	E1	E1	E1	E1	E1	E1	E1	E1	E1	E1
HG03045	E1a1	3.14313	E	E	E	IJ	E	IJ	H	H	AB	H	H	E	E	E	E	E	E	E	E	E	E	E	E	H	E	E	E	E	E	E	E	E	E	E	E	C	E1	E1	E1	E1	E1	E1	E1	E1	E1	E1	E1
HG03060	E1a1	2.93447	E	E	E	E	E	H	H	H	O	E	E	E	E	E	E	E	E	E	E	E	E	E	E	E	E	E	E	E	E	E	E	E	E	E	E	IJ	E1	E1	E1	E1	E1	E1	E1	E1	E1	E1	C
HG03074	E1a1	2.88935	E	E	E	E	E	IJ	E	O	H	O	O	H	E	E	E	E	E	E	E	E	E	E	E	H	E	E	E	E	E	E	E	E	E	E	E	G	E1	E1	E1	E1	E1	E1	E1	E1	E1	E1	AB
HG03077	E1a1	2.9408	E	E	E	IJ	IJ	IJ	H	O	E	H	H	O	E	E	E	E	E	E	E	E	E	E	H	E	E	E	E	E	E	E	E	E	E	E	E	E	E1	E1	E1	E1	E1	E1	E1	E1	E1	E1	E1
HG03078	E1a1	3.935	E	E	IJ	IJ	IJ	E	H	IJ	IJ	O	AB	O	E												E	E	E	E	E	E	E	E	E	E	O	E	E1	E1	E1	E1	E1	E1	E1	E1	E1	J2	E1
HG03084	E1a1	3.92404	E	E	IJ	IJ	IJ	IJ	H	E	O	O	O	O	E	E	E	E	E	E	E	E	E	E	E	C	E	E	E	E	E	E	E	E	E	E	E	H	E1	E1	E1	E1	E1	E1	E1	E1	E1	E1	E1
HG03103	E1a1	2.77592	E	E	E	E	E	E	E	E	E	E	E	AB	E	E	E	E	E	E	E	E	E	E	E	G	E	E	E	E	E	E	E	E	E	E	E	O	E1	E1	E1	E1	E1	E1	E1	E1	E1	E1	E1
HG03109	E1a1	3.66558	E	E	IJ	IJ	IJ	IJ	IJ	E	H	E	G	E	E	E	E	E	E	E	E	E	E	AB	E	H	E	E	E	E	E	E	E	E	E	E	R	LT	E1	E1	E1	E1	E1	E1	E1	E1	E1	E1	E1
HG03127	E1a1	3.39586	E	E	E	IJ	E	E	H	E	E	AB	N	O	E	E	E	E	E	E	E	E	E	E	E	E	E	E	E	E	E	E	E	E	E	E	E	E	E1	E1	E1	E1	E1	E1	E1	E1	E1	E1	E1
HG03139	E1a1	2.4657	E	E	E	E	E	E	E	E	E	E	H	O	E	E	E	E	E	E	E	E	E	E	E	E	E	E	E	E	E	E	E	E	E	E	E	E	E1	E1	E1	E1	E1	E1	E1	E1	E1	R1b	E1
HG03160	E1a1	1.86216	E	E	E	E	E	IJ	E	E	E	E	E	N	E												E	E	E	E	E	E	E	E	E	E	E	E	E1	E1	E1	E1	E1	E1	E1	E1	E1	E1	E4
HG03172	E1a1	2.66623	E	E	E	E	E	H	E	E	O	H	O	H	E	E	E	E	E	E	E	E	E	E	E	O	E	E	E	E	E	E	E	E	E	E	E	E	E1	E1	E1	E1	E1	E1	E1	E1	E1	E1	E1
HG03175	E1a1	2.58977	E	E	E	E	E	E	H	E	H	E	H	H	E	E	E	E	E	E	E	E	E	E	E	C	E	E	E	E	E	E	E	E	E	E	E	H	E1	E1	E1	E1	E1	E1	E1	E1	E1	E1	E1
HG03190	E1a1	2.49753	E	E	E	E	IJ	H	E	E	E	O	G	IJ	E	E	E	E	E	E	E	E	E	E	E	Q	E	E	E	E	E	E	E	E	E	E	E	Q	E1	E1	E1	E1	E1	E1	E1	E1	E1	E1	E1
HG03193	E1a1	2.62144	E	E	E	IJ	E	IJ	E	H	O	E	R	E	E	E	E	E	E	E	E	E	E	E	E	E	E	E	E	E	E	E	E	E	E	E	E	E	E1	E1	E1	E1	E1	E1	E1	E1	E1	H	E1
HG03196	E1a1	2.86116	E	E	E	E	E	E	IJ	E	E	E	O	E	E												E	E	E	E	E	E	E	E	E	E	E	C	E1	E1	E1	E1	E1	E1	E1	E1	E1	E1	E1
HG03199	E1a1	1.46574	E	E	E	E	E	E	IJ	E	E	O	H	N	E												E	E	E	E	E	E	E	E	E	E	E	C	E1	E1	E1	E1	E1	E1	E1	E1	E1	E1	E1
HG03224	E1a1	2.71385	E	E	E	E	E	E	H	E	E	H	E	H	E	E	E	E	E	E	E	E	E	E	E	O	E	E	E	E	E	E	E	E	E	E	E	N	E1	E1	E1	E1	E1	E1	E1	E1	E1	E1	E1
HG03268	E1a1	2.50462	E	E	E	E	E	E	IJ	E	IJ	E	H	O	E	E	E	E	E	E	E	E	E	E	E	R	E	E	E	E	E	E	E	E	E	E	E	E	E1	E1	E1	E1	E1	E1	E1	E2	E1	E1	E1
HG03271	E1a1	2.39417	E	E	E	E	E	IJ	E	E	H	H	O	H	E	E	E	E	E	E	E	E	E	E	E	AB	E	E	E	E	E	E	E	E	E	E	E	AB	E1	E1	E1	E1	E1	E1	E1	E1	E1	E1	E1
HG03280	E1a1	2.66145	E	E	E	E	E	IJ	IJ	E	E	E	O	E	E												E	E	E	E	E	E	E	E	E	E	O	C	E1	E1	E1	E1	E1	E1	E1	E1	E1	E1	R1b
HG03295	E1a1	3.73609	E	E	E	E	IJ	E	E	E	E	H	O	AB	E	E	E	E	E	E	E	E	E	E	E	E	E	E	E	E	E	E	E	E	E	E	E	H	E1	E1	E1	E1	E1	E1	E1	E1	E1	E1	E1
HG03301	E1a1	2.35229	E	E	E	IJ	E	E	E	O	O	E	H	H	E	E	E	E	E	E	E	E	E	E	E	R	E	E	E	E	E	E	E	E	E	E	E	E	E1	E1	E1	E1	E1	E1	E1	E1	E1	E1	E1
HG03352	E1a1	1.48077	E	E	E	E	E	E	IJ	H	H	O	H	E	E	E	E	E	E	E	E	E	E	E	E	G	E	E	E	E	E	E	E	E	E	E	E	R	E1	E1	E1	E1	E1	E1	E1	E1	E1	E1	E1
HG03367	E1a1	2.53937	E	E	E	E	E	IJ	H	E	E	O	E	Q	E	E	E	E	E	E	E	E	E	E	E	H	E	E	E	E	E	E	E	E	E	E	E	H	E1	E1	E1	E1	E1	E1	E1	E1	E1	E1	E1
HG03370	E1a1	3.08379	E	E	E	E	E	E	IJ	E	E	O	E	H	E	E	E	E	E	E	E	E	E	E	E	E	E	E	E	E	E	E	E	E	E	E	E	R	E1	E1	E1	E1	E1	E1	E1	E1	E1	E1	E1
HG03382	E1a1	2.86442	E	E	E	E	E	IJ	E	E	H	H	E	E	E	E	E	E	E	E	E	E	E	E	E	E	E	E	E	E	E	E	E	E	E	E	E	E	E1	E1	E1	E1	E1	E1	E1	E1	E1	E1	J2
HG03388	E1a1	2.58089	E	E	E	E	IJ	IJ	IJ	E	H	H	O	E	E												E	E	E	E	E	E	E	E	E	E	E	R	E1	E1	E1	E1	E1	E1	E1	E1	E1	E1	R1b
HG03432	E1a1	2.00886	E	E	E	E	E	E	E	E	E	H	H	E	E	E	E	E	E	E	E	E	E	E	E	E	E	E	E	E	E	E	E	E	E	E	E	O	E1	E1	E1	E1	E1	E1	E1	E1	E1	E1	E1
HG03433	E1a1	3.59337	E	E	E	E	IJ	E	H	E	O	O	H	O	E	E	E	E	E	E	E	E	E	E	E	AB	E	E	E	E	E	E	E	E	E	E	O	O	E1	E1	E1	E1	E1	E1	E1	E1	E1	E1	E1
HG03445	E1a1	3.09294	E	E	E	E	E	E	IJ	O	E	H	O	H	E	E	E	E	E	E	E	E	E	E	E	E	E	E	E	E	E	E	E	E	E	E	E	H	E1	E1	E1	E1	E1	E1	E1	E1	E1	E1	E1
HG03469	E1a1	4.47506	E	E	E	IJ	IJ	IJ	IJ	H	E	O	O	N	E	E	E	E	E	E	E	E	E	E	G	E	E	E	E	E	E	E	E	E	E	C	E	H	E1	E1	E1	E1	E1	E1	E1	E1	E1	E1	E1
HG03472	E1a1	2.97971	E	E	E	IJ	IJ	IJ	E	E	O	C	H	R	E												E	E	E	E	E	E	E	E	E	E	E	O	E1	E1	E1	E1	E1	E1	E1	E1	E1	H	E1
HG03515	E1a1	3.01284	E	E	E	E	E	IJ	IJ	O	E	AB	O	O	E												E	E	E	E	E	E	E	E	E	E	E	AB	E1	E1	E1	E1	E1	E1	E1	E1	E2	E1	E2
HG03518	E1a1	3.30397	E	E	E	E	E	E	IJ	E	H	E	O	O	E												E	E	E	E	E	E	E	E	E	E	C	H	E1	E1	E1	E1	E1	E1	E1	E1	E1	E1	E1
HG03538	E1a1	2.12003	E	E	E	E	E	E	E	E	E	H	E	H	E	E	E	E	E	E	E	E	E	E	E	R	E	E	E	E	E	E	E	E	E	E	E	H	E1	E1	E1	E1	E1	E1	E1	E1	E1	E1	E1
HG03547	E1a1	2.6816	E	E	E	E	E	IJ	IJ	E	G	E	H	O	E	E	E	E	E	E	E	E	E	E	O	H	E	E	E	E	E	E	E	E	E	E	E	E	E1	E1	E1	E1	E1	E1	E1	E1	E1	E1	O1
HG03556	E1a1	1.76945	E	E	E	E	E	IJ	E	H	H	O	E	H	E	E	E	E	E	E	E	E	E	E	E	E	E	E	E	E	E	E	E	E	E	E	E	E	E1	E1	E1	E1	E1	E1	E1	E1	E1	E1	O25
HG03565	E1a1	1.72322	E	E	E	E	E	E	IJ	O	H	E	O	N	E	E	E	E	E	E	E	E	E	E	E	C	E	E	E	E	E	E	E	E	E	E	E	H	E1	E1	E1	E1	E1	E1	E1	E1	E1	E1	O1
NA18504	E1a1	4.53551	E	E	IJ	IJ	IJ	E	H	H	O	O	N	IJ	E	E	E	E	E	E	E	E	E	E	E	E	E	E	E	E	E	E	E	E	E	E	N	H	E1	E1	E1	E1	E1	E1	E1	E1	E1	E1	I1
NA18507	E1a1		E												E												E												E1
NA18510	E1a1	3.67092	E	IJ	IJ	IJ	IJ	IJ	IJ	IJ	O	O	H	O	E												E	E	E	E	E	E	E	E	E	E	E	E	E1	E1	E1	E1	E1	E1	E1	E1	E1	J2	O25
NA18516	E1a1	1.3157	E	IJ	IJ	IJ	IJ	IJ	IJ	O	H	H	O	O	E	E	E	E	E	E	E	E	E	E	O	E	E	E	E	E	E	E	E	E	E	E	H	E	E1	E1	E1	E1	E1	E1	E1	E1	E1	O6	E2
NA18519	E1a1	4.30537	E	IJ	IJ	IJ	IJ	E	H	E	H	O	AB	H	E	E	E	E	E	E	E	E	E	E	E	E	E	E	E	E	E	E	E	E	E	E	H	E	E1	E1	E1	E1	E1	E1	E1	E1	E2	E1	I1
NA18868	E1a1	3.52007	E	IJ	IJ	IJ	IJ	IJ	IJ	E	E	G	O	H	E												E	E	E	E	E	E	E	E	E	E	E	R	E1	E1	E1	E1	E1	E1	E1	E2	E1	E1	J2
NA18874	E1a1	1.69025	E	E	IJ	E	IJ	IJ	E	H	E	O	O	H	E	E	E	E	E	E	E	E	E	E	E	H	E	E	E	E	E	E	E	E	E	E	O	R	E1	E1	E1	E1	E1	E1	E1	E1	E1	E1	O1
NA18877	E1a1	2.62538	E	E	E	E	E	E	E	E	E	E	H	O	E												E	E	E	E	E	E	E	E	E	E	E	E	E1	E1	E1	E1	E1	E1	E1	E1	E1	E1	E1
NA18908	E1a1	1.93374	E	IJ	IJ	IJ	IJ	IJ	IJ	H	IJ	H	H	G	E	E	E	E	E	E	E	E	E	E	E	E	E	E	E	E	E	E	E	E	E	E	E	H	E1	E1	E1	E1	E1	E1	E1	E1	E1	E1	J2
NA18915	E1a1	2.71757	E	E	E	E	E	IJ	E	E	E	E	E	G	E	E	E	E	E	E	E	E	E	E	E	E	E	E	E	E	E	E	E	E	E	E	E	H	E1	E1	E1	E1	E1	E1	E1	E1	E1	E1	E1
NA18917	E1a1	2.04895	E	E	E	IJ	IJ	E	IJ	O	H	H	H	H	E	E	E	E	E	E	E	E	E	E	E	Q	E	E	E	E	E	E	E	E	E	E	E	E	E1	E1	E1	E1	E1	E1	E1	E1	E1	E1	R1b
NA19026	E1a1	3.45055	E	E	E	IJ	IJ	E	E	E	H	O	IJ	H	E	E	E	E	E	E	E	E	E	E	E	E	E	E	E	E	E	E	E	E	E	E	E	AB	E1	E1	E1	E1	E1	E1	E1	E1	E1	J2	E1
NA19027	E1a1	2.79467	E	E	E	E	E	IJ	IJ	E	O	E	O	H	E	E	E	E	E	E	E	E	E	E	E	C	E	E	E	E	E	E	E	E	E	E	E	E	E1	E1	E1	E1	E1	E1	E1	E1	E1	E1	E1
NA19028	E1a1	2.84749	E	E	E	E	E	E	E	E	E	IJ	E	O	E	E	E	E	E	E	E	E	E	E	E	E	E	E	E	E	E	E	E	E	E	E	E	H	E1	E1	E1	E1	E1	E1	E1	E1	E1	E1	E1
NA19031	E1a1	3.65605	E	E	E	E	IJ	E	IJ	E	O	H	O	E	E	E	E	E	E	E	E	E	E	E	E	LT	E	E	E	E	E	E	E	E	E	E	E	E	E1	E1	E1	E1	E1	E1	E1	E1	E1	E1	E1
NA19041	E1a1	3.5016	E	E	E	E	E	E	E	E	E	E	E	C	E	E	E	E	E	E	E	E	E	E	E	E	E	E	E	E	E	E	E	E	E	E	E	R	E1	E1	E1	E1	E1	E1	E1	E1	E1	E1	E1
NA19092	E1a1	2.89185	E	E	E	IJ	IJ	E	IJ	E	E	O	IJ	E	E	E	E	E	E	E	E	E	E	E	E	O	E	E	E	E	E	E	E	E	E	E	E	IJ	E1	E1	E1	E1	E1	E1	E1	E1	E1	E1	O1
NA19098	E1a1	3.04132	E	E	E	E	IJ	E	E	E	O	E	H	G	E	E	E	E	E	E	E	E	E	E	E	C	E	E	E	E	E	E	E	E	E	E	H	E	E1	E1	E1	E1	E1	E1	E1	E1	E1	E1	E1
NA19107	E1a1	2.18126	E	E	E	E	E	IJ	E	E	H	E	G	O	E	E	E	E	E	E	E	E	E	E	E	E	E	E	E	E	E	E	E	E	E	E	E	AB	E1	E1	E1	E1	E1	E1	E1	E1	E1	E1	E1
NA19113	E1a1	2.34516	E	E	E	IJ	E	E	IJ	O	O	N	N	N	E	E	E	E	E	E	E	E	E	E	E	E	E	E	E	E	E	E	E	E	E	E	G	E	E1	E1	E1	E1	E1	E1	E1	E1	E1	E1	E1
NA19117	E1a1	3.3564	E	E	E	E	IJ	E	IJ	E	O	H	H	O	E	E	E	E	E	E	E	E	E	E	E	E	E	E	E	E	E	E	E	E	E	E	E	E	E1	E1	E1	E1	E1	E1	E1	E1	E1	E1	E1
NA19121	E1a1	3.05834	E	E	E	E	E	H	H	E	O	O	O	O	E	E	E	E	E	E	E	E	E	E	E	IJ	E	E	E	E	E	E	E	E	E	E	E	O	E1	E1	E1	E1	E1	E1	E1	E1	E1	E1	E1
NA19146	E1a1	3.58431	E	E	E	E	E	E	IJ	E	E	H	E	H	E												E	E	E	E	E	E	E	E	E	E	E	E	E1	E1	E1	E1	E1	E1	E1	E1	E1	E1	E2
NA19171	E1a1	3.75954	E	E	E	E	E	E	E	E	IJ	E	O	H	E	E	E	E	E	E	E	E	E	E	E	C	E	E	E	E	E	E	E	E	E	E	E	E	E1	E1	E1	E1	E1	E1	E1	E1	E1	E1	E1
NA19198	E1a1	1.83305	E	E	E	E	IJ	IJ	E	H	O	H	O	E	E	E	E	E	E	E	E	E	E	E	E	E	E	E	E	E	E	E	E	E	E	E	E	Q	E1	E1	E1	E1	E1	E1	E1	E1	E1	E1	E1
NA19207	E1a1	1.95498	E	E	E	E	E	E	IJ	O	E	H	G	O	E	E	E	E	E	E	E	E	E	E	H	AB	E	E	E	E	E	E	E	E	E	E	E	H	E1	E1	E1	E1	E1	E1	E1	E1	E1	E1	O6
NA19210	E1a1	2.3658	E	E	IJ	IJ	IJ	IJ	IJ	E	O	N	H	O	E												E	E	E	E	E	E	E	E	E	E	C	H	E1	E1	E1	E1	E1	E1	E1	E1	E1	E1	E1
NA19213	E1a1	3.85544	E	IJ	IJ	IJ	IJ	IJ	IJ	H	H	E	H	G	E	E	E	E	E	E	E	E	E	E	E	E	E	E	E	E	E	E	E	E	E	E	E	E	E1	E1	E1	E1	E1	E1	E1	E1	E2	E1	E4
NA19223	E1a1	1.83723	E	E	E	E	E	E	E	E	IJ	E	E	N	E	E	E	E	E	E	E	E	E	E	E	E	E	E	E	E	E	E	E	E	E	E	E	E	E1	E1	E1	E1	E1	E1	E1	E1	E1	E1	E1
NA19248	E1a1	1.4966	E	E	IJ	IJ	IJ	H	IJ	H	IJ	H	H	E	E	E	E	E	E	E	E	E	E	E	E	H	E	E	E	E	E	E	E	E	E	E	R	E	E1	E1	E1	E1	E1	E1	E1	E1	E1	E2	E1
NA19307	E1a1	3.96545	E	E	E	E	IJ	E	IJ	E	E	H	O	H	E												E	E	E	E	E	E	E	E	E	E	E	G	E1	E1	E1	E1	E1	E1	E1	E1	E1	E1	O6
NA19308	E1a1	4.00857	E	E	E	IJ	E	IJ	E	H	E	O	O	H	E												E	E	E	E	E	E	E	E	E	E	E	E	E1	E1	E1	E1	E1	E1	E1	E1	E1	E1	E1
NA19312	E1a1	1.75213	E	E	E	IJ	IJ	IJ	E	E	IJ	G	O	O	E												E	E	E	E	E	E	E	E	E	E	E	E	E1	E1	E1	E1	E1	E1	E1	E1	E1	E1	E2
NA19317	E1a1	1.56746	E	E	E	E	E	E	E	E	E	H	E	N	E												E	E	E	E	E	E	E	E	E	E	E	E	E1	E1	E1	E1	E1	E1	E1	E1	E1	E1	I2
NA19318	E1a1	1.9782	E	E	E	E	E	IJ	IJ	E	E	E	E	E	E	E	E	E	E	E	E	E	E	E	E	C	E	E	E	E	E	E	E	E	E	E	E	E	E1	E1	E1	E1	E1	E1	E1	E1	E1	E1	E1
NA19319	E1a1	2.44535	E	E	E	E	E	IJ	IJ	H	O	H	O	N	E	E	E	E	E	E	E	E	E	E	E	LT	E	E	E	E	E	E	E	E	E	E	E	G	E1	E1	E1	E1	E1	E1	E1	E1	E1	E1	E1
NA19347	E1a1	2.50979	E	E	IJ	IJ	IJ	IJ	IJ	H	E	C	C	O	E	E	E	E	E	E	E	E	E	E	G	E	E	E	E	E	E	E	E	E	E	E	E	IJ	E1	E1	E1	E1	E1	E1	E1	E1	E1	E1	E1
NA19350	E1a1	2.19199	E	E	E	IJ	IJ	IJ	IJ	O	E	G	N	N	E	E	E	E	E	E	E	E	E	E	H	E	E	E	E	E	E	E	E	E	E	R	E	C	E1	E1	E1	E1	E1	E1	E1	E2	E1	E2	E1
NA19360	E1a1	2.76429	E	E	E	E	E	E	E	E	E	E	H	H	E												E	E	E	E	E	E	E	E	E	E	E	E	E1	E1	E1	E1	E1	E1	E1	E1	E1	E1	E1
NA19372	E1a1	2.17934	E	E	E	E	E	IJ	E	E	H	H	E	H	E	E	E	E	E	E	E	E	E	E	E	E	E	E	E	E	E	E	E	E	E	E	E	E	E1	E1	E1	E1	E1	E1	E1	E1	E1	E1	E1
NA19376	E1a1	2.05376	E	E	E	E	IJ	IJ	E	E	O	E	E	E	E												E	E	E	E	E	E	E	E	E	E	E	E	E1	E1	E1	E1	E1	E1	E1	E1	E1	E1	E1
NA19383	E1a1	2.58736	E	E	E	E	E	E	E	IJ	IJ	O	H	N	E	E	E	E	E	E	E	E	E	E	E	IJ	E	E	E	E	E	E	E	E	E	E	H	AB	E1	E1	E1	E1	E1	E1	E1	E1	E1	E1	E1
NA19385	E1a1	2.09438	E	E	E	E	E	E	H	H	E	E	H	C	E	E	E	E	E	E	E	E	E	E	E	H	E	E	E	E	E	E	E	E	E	E	E	C	E1	E1	E1	E1	E1	E1	E1	E1	E1	E1	E1
NA19393	E1a1	2.02843	E	E	E	E	E	IJ	E	H	E	E	N	E	E	E	E	E	E	E	E	E	E	E	LT	G	E	E	E	E	E	E	E	E	E	E	E	IJ	E1	E1	E1	E1	E1	E1	E1	E1	E1	E1	E1
NA19394	E1a1	2.06031	E	E	E	E	E	E	E	O	E	O	R	E	E	E	E	E	E	E	E	E	E	E	E	E	E	E	E	E	E	E	E	E	E	E	E	E	E1	E1	E1	E1	E1	E1	E1	E1	E1	E2	E1
NA19428	E1a1	2.33547	E	E	E	E	E	IJ	E	E	E	H	C	N	E	E	E	E	E	E	E	E	E	H	E	O	E	E	E	E	E	E	E	E	E	E	E	E	E1	E1	E1	E1	E1	E1	E1	E1	E1	E1	E1
NA19429	E1a1	2.1619	E	E	E	IJ	E	IJ	E	IJ	E	H	O	E	E												E	E	E	E	E	E	E	E	E	E	E	O	E1	E1	E1	E1	E1	E1	E1	E1	E1	E1	E1
NA19430	E1a1	1.61075	E	IJ	IJ	IJ	IJ	IJ	IJ	O	E	G	O	O	E	E	E	E	E	E	E	E	E	E	H	H	E	E	E	E	E	E	E	E	E	H	E	C	E1	E1	E1	E1	E1	E1	E1	E1	E2	E1	R1b
NA19443	E1a1	3.8772	E	E	E	IJ	IJ	E	E	E	H	H	H	AB	E	E	E	E	E	E	E	E	E	E	E	AB	E	E	E	E	E	E	E	E	E	E	E	Q	E1	E1	E1	E1	E1	E1	E1	E1	E1	E1	E1
NA19451	E1a1	1.81242	E	E	IJ	IJ	IJ	IJ	IJ	O	O	N	O	E	E	E	E	E	E	E	E	E	E	E	E	E	E	E	E	E	E	E	E	E	E	E	E	E	E1	E1	E1	E1	E1	E1	E1	E1	E1	E4	J2
NA19452	E1a1	1.83675	E	IJ	IJ	IJ	IJ	H	IJ	O	O	O	AB	H	E	E	E	E	E	E	E	E	E	E	E	E	E	E	E	E	E	E	E	E	E	E	E	E	E1	E1	E1	E1	E1	E1	E1	E1	E1	E1	J2
NA19455	E1a1	2.12126	E	E	E	E	IJ	E	IJ	E	O	H	E	O	E	E	E	E	E	E	E	E	E	E	E	E	E	E	E	E	E	E	E	E	E	E	E	AB	E1	E1	E1	E1	E1	E1	E1	E1	E1	E1	J2
NA19461	E1a1	1.5725	E	E	IJ	IJ	E	IJ	IJ	E	IJ	E	O	N	E	E	E	E	E	E	E	E	E	E	E	E	E	E	E	E	E	E	E	E	E	E	E	G	E1	E1	E1	E1	E1	E1	E1	E1	E1	E1	O25
NA19466	E1a1	1.81224	E	E	E	IJ	IJ	H	E	O	H	E	H	H	E	E	E	E	E	E	E	E	E	E	E	H	E	E	E	E	E	E	E	E	E	E	E	H	E1	E1	E1	E1	E1	E1	E1	E1	E1	E1	E1
NA19834	E1a1	3.47193	E	E	E	IJ	E	IJ	H	H	H	E	H	E	E	E	E	E	E	E	E	E	E	C	E	E	E	E	E	E	E	E	E	E	E	E	E	E	E1	E1	E1	E1	E1	E1	E1	E1	E1	E1	I1
NA19904	E1a1	2.75121	E	E	E	IJ	IJ	IJ	IJ	O	H	IJ	O	E	E												E	E	E	E	E	E	E	E	E	E	E	O	E1	E1	E1	E1	E1	E1	E1	E1	E1	E1	E1
NA19908	E1a1	1.87423	E	E	E	E	IJ	E	E	E	H	H	O	R	E	E	E	E	E	E	E	E	E	E	E	E	E	E	E	E	E	E	E	E	E	E	E	H	E1	E1	E1	E1	E1	E1	E1	E1	E1	E1	C
NA19916	E1a1	1.90191	E	E	E	IJ	IJ	E	E	E	O	IJ	E	N	E												E	E	E	E	E	E	E	E	E	H	E	E	E1	E1	E1	E1	E1	E1	E1	E1	E1	E1	E1
NA19920	E1a1	4.8527	E	E	E	IJ	IJ	IJ	IJ	E	O	E	H	O	E	E	E	E	E	E	E	E	E	E	E	H	E	E	E	E	E	E	E	E	E	E	R	E	E1	E1	E1	E1	E1	E1	E1	E1	E1	E1	AB
NA20126	E1a1	1.52887	E	IJ	IJ	E	IJ	IJ	E	O	O	O	O	E	E	E	E	E	E	E	E	E	E	E	E	AB	E	E	E	E	E	E	E	E	E	E	E	C	E1	E1	E1	E1	E1	E1	E1	E1	E1	E1	E1
NA20281	E1a1	1.74156	E	E	E	E	IJ	E	E	E	H	H	H	H	E	E	E	E	E	E	E	E	E	E	E	LT	E	E	E	E	E	E	E	E	E	E	E	E	E1	E1	E1	E1	E1	E1	E1	E1	E1	E1	E1
NA20291	E1a1	1.83484	E	E	E	E	E	E	E	O	E	E	E	O	E												E	E	E	E	E	E	E	E	E	E	H	C	E1	E1	E1	E1	E1	E1	E1	E1	E1	E1	E1
NA20298	E1a1	3.19142	E	E	E	E	IJ	E	E	H	E	O	E	G	E	E	E	E	E	E	E	E	E	E	E	E	E	E	E	E	E	E	E	E	E	E	O	H	E1	E1	E1	E1	E1	E1	E1	E1	E1	E1	E1
NA20362	E1a1	2.44324	E	E	E	E	E	E	E	E	E	O	G	E	E	E	E	E	E	E	E	E	E	E	AB	E	E	E	E	E	E	E	E	E	E	E	E	E	E1	E1	E1	E1	E1	E1	E1	E1	E1	E1	E1
HG01204	E1a2	2.37857	E	E	E	E	IJ	IJ	E	IJ	H	O	E	N	E	E	E	E	E	E	E	E	E	E	E	E	E	E	E	E	E	E	E	E	E	E	E	E	E1	E1	E1	E1	E1	E1	E1	E1	E1	E2	O1
HG01362	E1a2	4.33434	E	E	E	E	E	IJ	E	E	E	O	O	C	E	E	E	E	E	E	E	E	E	E	H	O	E	E	E	E	E	E	E	E	E	E	E	H	E1	E1	E1	E1	E1	E1	E1	E1	E1	E2	E1
HG01485	E1a2	2.65605	E	E	E	E	E	E	IJ	H	E	H	E	O	E	E	E	E	E	E	E	E	E	E	E	C	E	E	E	E	E	E	E	E	E	E	E	Q	E1	E1	E1	E1	E1	E1	E1	E1	E1	E1	E1
HG01885	E1a2	2.62539	E	E	E	IJ	E	E	E	H	IJ	H	H	O	E	E	E	E	E	E	E	E	E	E	E	E	E	E	E	E	E	E	E	E	E	H	O	R	E1	E1	E1	E1	E1	E1	E1	E1	E1	E1	E1
HG01912	E1a2	1.89496	E	E	E	E	E	E	E	H	H	H	E	AB	E	E	E	E	E	E	E	E	E	E	E	E	E	E	E	E	E	E	E	E	E	E	E	IJ	E1	E1	E1	E1	E1	E1	E1	E1	E1	E1	E1
HG01914	E1a2	2.23604	E	E	E	E	E	E	IJ	E	O	O	O	O	E	E	E	E	E	E	E	E	E	E	E	O	E	E	E	E	E	E	E	E	E	E	E	E	E1	E1	E1	E1	E1	E1	E1	E1	E1	E1	E1
HG02053	E1a2	1.44073	E	E	E	E	IJ	E	IJ	H	E	O	O	H	E	E	E	E	E	E	E	E	E	E	E	O	E	E	E	E	E	E	E	E	E	E	E	H	E1	E1	E1	E1	E1	E1	E1	E1	E1	H	E1
HG02143	E1a2	2.48107	E	E	E	E	E	IJ	E	E	E	E	G	O	E	E	E	E	E	E	E	E	E	E	E	E	E	E	E	E	E	E	E	E	E	E	E	E	E1	E1	E1	E1	E1	E1	E1	E1	E1	E1	E1
HG02314	E1a2	2.21132	E	E	E	E	E	E	E	E	H	E	E	H	E	E	E	E	E	E	E	E	E	E	H	E	E	E	E	E	E	E	E	E	E	E	O	E	E1	E1	E1	E1	E1	E1	E1	E1	E1	E2	C
HG02332	E1a2	6.61104	E	E	E	IJ	E	H	IJ	G	O	R	E	E	E	E	E	E	E	E	E	E	E	E	E	H	E	E	E	E	E	E	E	E	E	E	E	E	E1	E1	E1	E1	E1	E1	E1	E1	E1	E1	E1
HG02439	E1a2	2.79759	E	E	E	E	IJ	IJ	E	E	H	H	O	H	E	E	E	E	E	E	E	E	E	E	E	O	E	E	E	E	E	E	E	E	E	E	E	E	E1	E1	E1	E1	E1	E1	E1	E1	E1	E1	E1
HG02455	E1a2	2.52403	E	E	E	E	IJ	IJ	IJ	E	H	E	N	N	E	E	E	E	E	E	E	E	E	E	C	E	E	E	E	E	E	E	E	E	E	E	E	E	E1	E1	E1	E1	E1	E1	E1	E1	E2	E1	E1
HG02541	E1a2	2.79885	E	E	E	E	IJ	E	H	E	E	G	H	H	E	E	E	E	E	E	E	E	E	E	E	H	E	E	E	E	E	E	E	E	E	E	E	O	E1	E1	E1	E1	E1	E1	E1	E1	E1	E1	E1
HG02554	E1a2	3.20032	E	E	E	E	IJ	E	E	E	E	H	H	Q	E	E	E	E	E	E	E	E	E	E	E	E	E	E	E	E	E	E	E	E	E	E	E	R	E1	E1	E1	E1	E1	E1	E1	E1	E1	E1	E1
HG02557	E1a2	2.51378	E	E	E	E	E	E	IJ	E	E	O	E	O	E	E	E	E	E	E	E	E	E	E	E	R	E	E	E	E	E	E	E	E	E	E	E	O	E1	E1	E1	E1	E1	E1	E1	E1	E1	E1	E1
HG02594	E1a2	5.05348	E	E	E	IJ	IJ	E	E	E	E	O	N	O	E	E	E	E	E	E	E	E	E	E	E	E	E	E	E	E	E	E	E	E	E	E	E	G	E1	E1	E1	E1	E1	E1	E1	E1	E1	E1	E1
HG02610	E1a2	3.81011	E	E	IJ	IJ	IJ	IJ	E	E	H	H	H	H	E	E	E	E	E	E	E	E	E	E	H	E	E	E	E	E	E	E	E	E	E	E	E	IJ	E1	E1	E1	E1	E1	E1	E1	E1	E1	E1	J2
HG02721	E1a2	4.12544	E	E	E	E	IJ	IJ	IJ	E	O	E	H	C	E												E	E	E	E	E	E	E	E	E	E	E	E	E1	E1	E1	E1	E1	E1	E1	E1	E1	E1	E1
HG02839	E1a2	2.50938	E	E	E	E	E	E	E	E	H	E	O	H	E	E	E	E	E	E	E	E	E	E	E	E	E	E	E	E	E	E	E	E	E	E	C	H	E1	E1	E1	E1	E1	E1	E1	E1	E1	E1	E1
HG02881	E1a2	3.44868	E	E	E	E	E	E	IJ	E	E	H	O	E	E	E	E	E	E	E	E	E	E	E	E	C	E	E	E	E	E	E	E	E	E	E	E	E	E1	E1	E1	E1	E1	E1	E1	E1	E1	C	E1
HG02884	E1a2	2.28821	E	E	E	E	IJ	IJ	E	E	E	O	E	H	E	E	E	E	E	E	E	E	E	H	E	E	E	E	E	E	E	E	E	E	E	E	E	C	E1	E1	E1	E1	E1	E1	E1	E1	E1	E1	H
HG02895	E1a2	2.07866	E	E	E	E	E	E	E	E	H	C	IJ	R	E												E	E	E	E	E	E	E	E	E	E	E	C	E1	E1	E1	E1	E1	E1	E1	E1	E1	E1	E1
HG02923	E1a2	4.01285	E	E	IJ	IJ	IJ	H	E	H	IJ	G	E	E	E	E	E	E	E	E	E	E	E	E	E	E	E	E	E	E	E	E	E	E	E	E	E	C	E1	E1	E1	E1	E1	E1	E1	E1	E1	E1	E1
HG02938	E1a2	2.38904	E	E	E	E	E	IJ	E	H	H	E	H	G	E	E	E	E	E	E	E	E	E	E	E	H	E	E	E	E	E	E	E	E	E	E	E	R	E1	E1	E1	E1	E1	E1	E1	E1	E1	E1	E1
HG02941	E1a2	2.14776	E	E	E	IJ	IJ	E	E	E	E	E	O	E	E	E	E	E	E	E	E	E	E	E	H	C	E	E	E	E	E	E	E	E	E	E	E	E	E1	E1	E1	E1	E1	E1	E1	E1	E1	E1	O1
HG02953	E1a2	1.73382	E	E	E	E	E	IJ	E	H	H	O	H	G	E	E	E	E	E	E	E	E	E	E	C	C	E	E	E	E	E	E	E	E	E	E	O	N	E1	E1	E1	E1	E1	E1	E1	E1	E1	E1	E1
HG02968	E1a2	2.39555	E	E	E	E	E	E	IJ	H	E	H	H	O	E	E	E	E	E	E	E	E	E	E	E	AB	E	E	E	E	E	E	E	E	E	E	E	O	E1	E1	E1	E1	E1	E1	E1	E1	E1	E1	E1
HG02973	E1a2	4.09943	E	E	E	IJ	IJ	IJ	IJ	E	IJ	O	C	H	E	E	E	E	E	E	E	E	E	E	E	E	E	E	E	E	E	E	E	E	E	E	H	E	E1	E1	E1	E1	E1	E1	E1	E1	E1	E4	C
HG03072	E1a2	2.85316	E	E	E	E	E	IJ	E	E	H	H	H	H	E	E	E	E	E	E	E	E	E	E	E	AB	E	E	E	E	E	E	E	E	E	E	E	H	E1	E1	E1	E1	E1	E1	E1	E1	E1	E2	E2
HG03081	E1a2	2.63599	E	E	E	E	E	IJ	E	E	E	E	O	H	E	E	E	E	E	E	E	E	E	E	E	H	E	E	E	E	E	E	E	E	E	E	E	LT	E1	E1	E1	E1	E1	E1	E1	E1	E1	E1	I1
HG03100	E1a2	3.4737	E	E	IJ	IJ	IJ	IJ	IJ	H	H	H	O	O	E												E	E	E	E	E	E	E	E	E	E	R	E	E1	E1	E1	E1	E1	E1	E1	E1	E1	E1	E1
HG03112	E1a2	3.05775	E	E	E	E	E	IJ	E	IJ	E	H	O	O	E	E	E	E	E	E	E	E	E	C	E	IJ	E	E	E	E	E	E	E	E	E	E	E	H	E1	E1	E1	E1	E1	E1	E1	E1	E1	E1	E1
HG03115	E1a2	4.18449	E	E	E	IJ	IJ	E	IJ	O	E	O	H	H	E	E	E	E	E	E	E	E	E	E	E	H	E	E	E	E	E	E	E	E	E	E	E	AB	E1	E1	E1	E1	E1	E1	E1	E1	E1	E1	E1
HG03118	E1a2	2.17737	E	E	E	E	E	IJ	IJ	H	E	E	O	O	E	E	E	E	E	E	E	E	E	E	E	O	E	E	E	E	E	E	E	E	E	E	E	E	E1	E1	E1	E1	E1	E1	E1	E1	E1	E1	C
HG03120	E1a2	3.74773	E	E	E	IJ	IJ	IJ	H	H	E	O	H	G	E	E	E	E	E	E	E	E	E	E	E	AB	E	E	E	E	E	E	E	E	E	O	E	E	E1	E1	E1	E1	E1	E1	E1	E1	E1	E1	C
HG03124	E1a2	3.75399	E	E	E	IJ	E	IJ	IJ	H	E	E	G	IJ	E	E	E	E	E	E	E	E	E	E	E	O	E	E	E	E	E	E	E	E	E	O	E	O	E1	E1	E1	E1	E1	E1	E1	E1	E1	E1	E1
HG03133	E1a2	4.33142	E	E	E	IJ	IJ	E	E	H	IJ	E	O	H	E	E	E	E	E	E	E	E	E	E	E	C	E	E	E	E	E	E	E	E	E	E	H	G	E1	E1	E1	E1	E1	E1	E1	E1	E1	E1	E2
HG03136	E1a2	3.42016	E	E	E	IJ	IJ	IJ	IJ	H	O	H	O	C	E	E	E	E	E	E	E	E	E	E	E	R	E	E	E	E	E	E	E	E	E	H	E	R	E1	E1	E1	E1	E1	E1	E1	E1	E2	E1	R1b
HG03157	E1a2	2.19069	E	E	E	E	E	IJ	E	E	E	O	E	E	E	E	E	E	E	E	E	E	E	E	O	E	E	E	E	E	E	E	E	E	E	E	E	AB	E1	E1	E1	E1	E1	E1	E1	E1	E1	E1	E4
HG03163	E1a2	2.63739	E	E	E	E	IJ	E	E	IJ	IJ	O	O	N	E	E	E	E	E	E	E	E	E	E	E	E	E	E	E	E	E	E	E	E	E	E	E	E	E1	E1	E1	E1	E1	E1	E1	E1	E1	E1	R1b
HG03166	E1a2	3.01299	E	E	E	E	E	E	E	E	O	E	H	E	E												E	E	E	E	E	E	E	E	E	R	E	E	E1	E1	E1	E1	E1	E1	E1	E1	E1	E1	E1
HG03169	E1a2	1.96443	E	E	E	E	E	E	E	E	IJ	O	E	O	E	E	E	E	E	E	E	E	E	E	E	AB	E	E	E	E	E	E	E	E	E	E	E	H	E1	E1	E1	E1	E1	E1	E1	E1	E1	E1	E1
HG03202	E1a2	3.28171	E	E	E	E	E	H	E	O	E	E	H	E	E	E	E	E	E	E	E	E	E	E	E	G	E	E	E	E	E	E	E	E	E	E	E	IJ	E1	E1	E1	E1	E1	E1	E1	E1	E1	E1	E1
HG03209	E1a2	1.99232	E	E	E	E	IJ	E	IJ	E	E	O	E	G	E	E	E	E	E	E	E	E	E	E	E	E	E	E	E	E	E	E	E	E	E	E	E	O	E1	E1	E1	E1	E1	E1	E1	E1	E1	E1	E1
HG03240	E1a2	2.72329	E	E	E	E	E	IJ	E	H	E	E	H	O	E												E	E	E	E	E	E	E	E	E	E	E	O	E1	E1	E1	E1	E1	E1	E1	E1	E1	E2	E2
HG03265	E1a2	2.7592	E	E	E	E	IJ	IJ	E	O	E	H	H	N	E	E	E	E	E	E	E	E	E	E	H	H	E	E	E	E	E	E	E	E	E	E	E	C	E1	E1	E1	E1	E1	E1	E1	E1	E1	E1	H
HG03298	E1a2	3.32251	E	E	E	E	IJ	E	E	IJ	E	O	E	O	E	E	E	E	E	E	E	E	E	E	E	E	E	E	E	E	E	E	E	E	E	E	E	E	E1	E1	E1	E1	E1	E1	E1	E1	E1	E1	E1
HG03304	E1a2	2.40678	E	E	E	E	E	H	E	H	E	E	H	E	E	E	E	E	E	E	E	E	E	E	E	Q	E	E	E	E	E	E	E	E	E	E	E	E	E1	E1	E1	E1	E1	E1	E1	E1	E1	E1	E1
HG03311	E1a2	1.58125	E	E	E	E	E	E	H	E	H	O	O	H	E												E	E	E	E	E	E	E	E	E	E	E	C	E1	E1	E1	E1	E1	E1	E1	E1	E1	E1	E1
HG03313	E1a2	2.04604	E	E	E	IJ	E	E	E	E	O	G	AB	N	E	E	E	E	E	E	E	E	E	E	AB	E	E	E	E	E	E	E	E	E	E	E	E	E	E1	E1	E1	E1	E1	E1	E1	E1	E1	E1	E1
HG03343	E1a2	1.69626	E	E	E	E	IJ	IJ	E	E	E	E	N	O	E	E	E	E	E	E	E	E	E	E	E	H	E	E	E	E	E	E	E	E	E	E	E	E	E1	E1	E1	E1	E1	E1	E1	E1	E1	E1	E1
HG03394	E1a2	1.86282	E	E	E	E	IJ	IJ	H	E	E	H	O	E	E	E	E	E	E	E	E	E	E	E	E	E	E	E	E	E	E	E	E	E	E	E	E	E	E1	E1	E1	E1	E1	E1	E1	E1	E1	E1	E1
HG03451	E1a2	4.31157	E	E	E	E	IJ	IJ	E	E	IJ	H	IJ	N	E	E	E	E	E	E	E	E	E	E	E	C	E	E	E	E	E	E	E	E	E	E	E	C	E1	E1	E1	E1	E1	E1	E1	E1	E1	E1	E1
HG03478	E1a2	2.75715	E	E	E	E	E	E	E	E	H	O	O	H	E	E	E	E	E	E	E	E	E	E	E	C	E	E	E	E	E	E	E	E	E	E	E	C	E1	E1	E1	E1	E1	E1	E1	E1	E1	E1	E1
HG03484	E1a2	2.55215	E	E	E	IJ	E	E	H	E	O	IJ	O	E	E	E	E	E	E	E	E	E	E	E	E	E	E	E	E	E	E	E	E	E	E	H	E	E	E1	E1	E1	E1	E1	E1	E1	E1	E1	G	E1
HG03521	E1a2	2.21563	E	E	E	E	E	IJ	E	H	H	E	E	N	E	E	E	E	E	E	E	E	E	E	E	E	E	E	E	E	E	E	E	E	E	E	E	E	E1	E1	E1	E1	E1	E1	E1	E1	E1	E1	E1
HG03571	E1a2	1.7694	E	E	E	E	E	E	E	H	IJ	H	H	G	E	E	E	E	E	E	E	E	E	E	E	C	E	E	E	E	E	E	E	E	E	R	E	C	E1	E1	E1	E1	E1	E1	E1	E1	E1	E1	E1
NA18486	E1a2	2.16867	E	IJ	IJ	IJ	IJ	IJ	E	H	IJ	H	O	H	E	E	E	E	E	E	E	E	E	E	E	AB	E	E	E	E	E	E	E	E	E	E	O	C	E1	E1	E1	E1	E1	E1	E1	E2	E1	O25	E4
NA18498	E1a2	1.06065	E	E	IJ	IJ	IJ	E	IJ	IJ	E	IJ	H	E	E	E	E	E	E	E	E	E	E	E	E	E	E	E	E	E	E	E	E	E	E	E	E	AB	E1	E1	E1	E1	E1	E1	E1	E1	E1	E1	O6
NA18501	E1a2	2.5923	E	E	E	E	IJ	IJ	E	E	E	E	N	E	E	E	E	E	E	E	E	E	E	E	H	C	E	E	E	E	E	E	E	E	E	E	E	C	E1	E1	E1	E1	E1	E1	E1	E1	E1	E1	E1
NA18522	E1a2	1.01491	E	IJ	IJ	IJ	IJ	IJ	IJ	H	O	H	H	O	E	E	E	E	E	E	E	E	E	E	H	H	E	E	E	E	E	E	E	E	E	E	E	Q	E1	E1	E1	E1	E1	E1	E1	E2	E1	AB	E2
NA18853	E1a2		E												E												E												E1
NA18865	E1a2	2.5443	E	E	E	E	E	E	E	E	E	O	H	E	E	E	E	E	E	E	E	E	E	E	E	H	E	E	E	E	E	E	E	E	E	E	E	O	E1	E1	E1	E1	E1	E1	E1	E1	E1	E1	E1
NA18871	E1a2	1.15901	E	IJ	IJ	IJ	IJ	IJ	E	E	IJ	O	E	H	E	E	E	E	E	E	E	E	E	E	E	E	E	E	E	E	E	E	E	E	E	E	H	H	E1	E1	E1	E1	E1	E1	E1	E2	E1	E1	R1b
NA18879	E1a2	2.4494	E	E	E	E	IJ	E	E	E	E	H	G	E	E	E	E	E	E	E	E	E	E	E	E	C	E	E	E	E	E	E	E	E	E	E	E	R	E1	E1	E1	E1	E1	E1	E1	E1	E1	E1	R1a
NA18923	E1a2	1.91051	E	E	E	E	E	E	E	E	O	O	AB	C	E												E	E	E	E	E	E	E	E	E	E	E	E	E1	E1	E1	E1	E1	E1	E1	E1	E1	E2	E1
NA18934	E1a2	1.55471	E	E	E	E	E	E	IJ	E	E	O	H	H	E	E	E	E	E	E	E	E	E	E	E	E	E	E	E	E	E	E	E	E	E	E	E	R	E1	E1	E1	E1	E1	E1	E1	E1	E1	E1	E1
NA19020	E1a2	3.04123	E	E	E	E	E	E	IJ	E	E	E	H	O	E	E	E	E	E	E	E	E	E	E	E	E	E	E	E	E	E	E	E	E	E	E	E	AB	E1	E1	E1	E1	E1	E1	E1	E1	E1	E1	E1
NA19025	E1a2	2.83284	E	E	E	E	E	E	E	IJ	G	E	E	O	E	E	E	E	E	E	E	E	E	E	E	O	E	E	E	E	E	E	E	E	E	E	E	H	E1	E1	E1	E1	E1	E1	E1	E1	E1	E1	E1
NA19096	E1a2	2.76798	E	E	E	E	IJ	IJ	E	H	O	E	H	H	E	E	E	E	E	E	E	E	E	E	E	E	E	E	E	E	E	E	E	E	E	E	E	C	E1	E1	E1	E1	E1	E1	E1	E1	E1	E1	E1
NA19119	E1a2	4.35041	E	E	E	E	E	IJ	E	E	E	E	O	AB	E												E	E	E	E	E	E	E	E	E	E	E	G	E1	E1	E1	E1	E1	E1	E1	E1	E1	E1	E1
NA19130	E1a2	1.76255	E	E	IJ	IJ	IJ	IJ	IJ	H	IJ	H	IJ	H	E												E	E	E	E	E	E	E	E	E	H	E	H	E1	E2	E2	E1	E1	E1	E1	E1	E1	E1	R1b
NA19138	E1a2	2.31222	E	E	IJ	IJ	IJ	IJ	IJ	O	O	C	O	G	E	E	E	E	E	E	E	E	E	E	AB	G	E	E	E	E	E	E	E	E	E	E	O	E	E1	E1	E1	E1	E1	E1	E1	E1	E1	E1	AB
NA19141	E1a2	1.58356	E	E	E	E	E	E	E	E	H	O	H	O	E	E	E	E	E	E	E	E	E	E	E	Q	E	E	E	E	E	E	E	E	E	E	E	H	E1	E1	E1	E1	E1	E1	E1	E1	E1	E1	E1
NA19144	E1a2	2.09218	E	E	IJ	IJ	IJ	E	E	H	H	H	O	E	E	E	E	E	E	E	E	E	E	E	E	E	E	E	E	E	E	E	E	E	E	E	E	H	E1	E1	E1	E1	E1	E1	E1	E1	E1	E1	E1
NA19153	E1a2	2.16933	E	E	E	E	E	IJ	IJ	O	H	E	E	O	E												E	E	E	E	E	E	E	E	E	E	E	O	E1	E1	E1	E1	E1	E1	E1	E1	E1	E1	E1
NA19160	E1a2	1.75556	E	E	E	E	E	E	E	E	IJ	H	O	N	E	E	E	E	E	E	E	E	E	E	E	E	E	E	E	E	E	E	E	E	E	E	E	Q	E1	E1	E1	E1	E1	E1	E1	E1	E1	E2	E1
NA19184	E1a2	3.53015	E	E	E	E	E	E	E	IJ	E	E	O	H	E	E	E	E	E	E	E	E	E	E	E	O	E	E	E	E	E	E	E	E	E	E	E	O	E1	E1	E1	E1	E1	E1	E1	E1	E1	E1	E1
NA19236	E1a2	1.64827	E	E	E	E	IJ	E	IJ	H	H	AB	IJ	H	E	E	E	E	E	E	E	E	E	E	E	E	E	E	E	E	E	E	E	E	E	E	E	E	E1	E1	E1	E1	E1	E1	E1	E1	E1	E1	E1
NA19256	E1a2	2.32422	E	E	E	E	E	E	E	E	E	O	E	E	E	E	E	E	E	E	E	E	E	E	E	E	E	E	E	E	E	E	E	E	E	H	E	E	E1	E1	E1	E1	E1	E1	E1	E1	E1	E1	E1
NA19346	E1a2	2.53008	E	E	E	IJ	IJ	IJ	IJ	H	H	E	H	H	E	E	E	E	E	E	E	E	E	E	E	E	E	E	E	E	E	E	E	E	E	C	H	E	E1	E1	E1	E1	E1	E1	E1	E1	E1	E1	R1b
NA19374	E1a2	2.22252	E	E	E	E	IJ	E	IJ	E	E	G	H	O	E	E	E	E	E	E	E	E	E	AB	AB	E	E	E	E	E	E	E	E	E	E	E	E	R	E1	E1	E1	E1	E1	E1	E1	E1	E1	E1	E1
NA19375	E1a2	2.14622	E	E	E	E	E	E	E	O	H	O	N	O	E	E	E	E	E	E	E	E	E	E	E	AB	E	E	E	E	E	E	E	E	E	E	E	E	E1	E1	E1	E1	E1	E1	E1	E1	E1	E1	E1
NA19397	E1a2	2.27765	E	E	E	E	E	IJ	IJ	E	E	R	E	H	E	E	E	E	E	E	E	E	E	E	E	C	E	E	E	E	E	E	E	E	E	E	E	R	E1	E1	E1	E1	E1	E1	E1	E1	E1	E1	E1
NA19448	E1a2	1.95661	E	IJ	IJ	IJ	IJ	IJ	IJ	E	O	H	E	C	E												E	E	E	E	E	E	E	E	E	E	H	AB	E1	E1	E1	E1	E1	E1	E1	E1	E1	E1	J2
NA19700	E1a2	2.34649	E	E	E	IJ	E	IJ	E	E	E	H	O	G	E	E	E	E	E	E	E	E	E	E	E	C	E	E	E	E	E	E	E	E	E	E	O	H	E1	E1	E1	E1	E1	E1	E1	E1	E1	E1	E1
NA19703	E1a2	2.18279	E	E	E	E	IJ	H	E	H	E	E	H	C	E	E	E	E	E	E	E	E	E	E	E	C	E	E	E	E	E	E	E	E	E	E	E	E	E1	E1	E1	E1	E1	E1	E1	E1	E1	E2	O25
NA19711	E1a2	1.4752	E	E	E	E	IJ	H	E	H	G	O	H	R	E	E	E	E	E	E	E	E	E	E	O	E	E	E	E	E	E	E	E	E	E	E	E	E	E1	E1	E1	E1	E1	E1	E1	E1	E1	E1	E1
NA20340	E1a2	2.08003	E	E	E	E	E	E	E	H	O	O	N	LT	E												E	E	E	E	E	E	E	E	E	E	E	H	E1	E1	E1	E1	E1	E1	E1	E1	E1	E1	E1
NA20346	E1a2	1.80729	E	E	E	E	E	E	IJ	O	O	H	E	E	E	E	E	E	E	E	E	E	E	E	E	O	E	E	E	E	E	E	E	E	E	H	E	C	E1	E1	E1	E1	E1	E1	E1	E1	E1	H	E1
HG02628	E1b	3.17524	E	E	E	IJ	E	E	IJ	H	E	O	H	H	E												E	E	E	E	E	E	E	E	E	E	E	C	E1	E1	E1	E1	E1	E1	E1	E1	E1	E1	E4
HG03054	E1b	3.63411	E	E	E	IJ	IJ	E	E	E	H	E	H	E	E	E	E	E	E	E	E	E	E	E	E	R	E	E	E	E	E	E	E	E	E	E	E	O	E1	E1	E1	E1	E1	E1	E1	E1	E1	E2	E1
HG03057	E1b	3.40087	E	E	IJ	IJ	IJ	IJ	IJ	E	O	E	E	IJ	E	E	E	E	E	E	E	E	E	E	E	G	E	E	E	E	E	E	E	E	E	E	E	AB	E1	E1	E1	E1	E1	E1	E1	E1	E1	E1	E4
HG03063	E1b	2.89442	E	E	E	E	IJ	E	E	E	E	O	O	H	E	E	E	E	E	E	E	E	E	E	E	C	E	E	E	E	E	E	E	E	E	E	E	Q	E1	E1	E1	E1	E1	E1	E1	E1	E1	E1	E2
HG03066	E1b	3.24276	E	E	E	E	E	IJ	IJ	E	O	H	E	O	E	E	E	E	E	E	E	E	E	E	E	E	E	E	E	E	E	E	E	E	E	E	E	R	E1	E1	E1	E1	E1	E1	E1	E1	E1	E1	E2
HG03069	E1b	2.50628	E	E	E	E	E	IJ	E	H	E	O	H	R	E												E	E	E	E	E	E	E	E	E	E	E	Q	E1	E1	E1	E1	E1	E1	E1	E1	E1	E2	R1b
HG03385	E1b	2.01349	E	E	E	IJ	E	IJ	E	E	E	N	O	H	E	E	E	E	E	E	E	E	E	E	E	E	E	E	E	E	E	E	E	E	E	E	E	C	E1	E1	E1	E1	E1	E1	E1	E1	E1	E2	E1
HG03391	E1b	4.07022	E	E	E	IJ	IJ	IJ	IJ	E	H	H	H	O	E	E	E	E	E	E	E	E	E	E	E	O	E	E	E	E	E	E	E	E	E	E	E	C	E1	E1	E1	E1	E1	E1	E1	E1	E1	E1	C
HG03397	E1b	3.89244	E	E	E	IJ	IJ	IJ	E	IJ	E	E	G	H	E	E	E	E	E	E	E	E	E	E	E	O	E	E	E	E	E	E	E	E	E	E	E	E	E1	E1	E1	E1	E1	E1	E1	E1	E2	E4	E1
HG03436	E1b	1.71078	E	E	E	E	IJ	E	E	E	H	O	H	N	E	E	E	E	E	E	E	E	E	E	E	R	E	E	E	E	E	E	E	E	E	E	E	O	E1	E1	E1	E1	E1	E1	E1	E1	E2	E1	E1
HG03442	E1b	2.1996	E	E	E	E	IJ	E	E	O	E	R	O	Q	E	E	E	E	E	E	E	E	E	E	E	E	E	E	E	E	E	E	E	E	E	E	E	IJ	E1	E1	E1	E1	E1	E1	E1	E1	E2	E1	E1
HG03457	E1b	2.15627	E	E	E	E	IJ	E	E	E	E	N	E	AB	E	E	E	E	E	E	E	E	E	E	E	O	E	E	E	E	E	E	E	E	E	E	E	O	E1	E1	E1	E1	E1	E1	E1	E1	E1	E2	E4
HG03460	E1b	3.3228	E	E	E	E	E	E	H	E	O	E	H	O	E	E	E	E	E	E	E	E	E	E	E	C	E	E	E	E	E	E	E	E	E	O	E	C	E1	E1	E1	E1	E1	E1	E1	E1	E2	E1	E4
HG01377	E2a	1.84196	E	E	E	IJ	E	H	H	IJ	H	H	E	H	E	E	E	E	E	E	E	E	E	E	E	C	E	E	E	E	E	E	E	E	E	E	R	R	E2	E2	E2	E2	E2	E2	E2	E2	E2	E2	E2
HG02330	E2a	2.51917	E	E	IJ	IJ	IJ	IJ	H	O	H	AB	H	H	E	E	E	E	E	E	E	E	E	E	E	E	E	E	E	E	E	E	E	E	E	E	E	N	E2	E2	E2	E2	E2	E2	E2	E2	E2	E2	E4
HG02807	E2a	3.37664	E	E	IJ	IJ	IJ	H	IJ	H	H	H	H	R	E												E	E	E	E	E	E	E	E	E	E	E	H	E2	E2	E2	E2	E2	E2	E2	E2	E2	E2	E2
NA19780	E2a	3.84808	E	E	IJ	IJ	IJ	E	E	H	H	O	H	O	E	E	E	E	E	E	E	E	E	E	H	G	E	E	E	E	E	E	E	E	E	E	E	H	E2	E2	E2	E2	E2	E2	E2	E2	E2	E2	E2
NA19818	E2a	2.50325	E	E	IJ	IJ	IJ	IJ	IJ	H	H	H	H	N	E	E	E	E	E	E	E	E	E	E	E	H	E	E	E	E	E	E	E	E	E	E	R	E	E2	E2	E2	E2	E2	E2	E2	E2	E2	E2	E2
HG01054	E2a	2.04682	E	E	E	IJ	IJ	IJ	H	O	O	N	O	H	E	E	E	E	E	E	E	E	E	E	E	E	E	E	E	E	E	E	E	E	E	E	E	Q	E2	E2	E2	E2	E2	E2	E2	E2	E2	E2	E2
HG01072	E2a	2.41182	E	E	IJ	IJ	IJ	H	IJ	H	H	E	O	O	E												E	E	E	E	E	E	E	E	E	E	E	H	E2	E2	E2	E2	E2	E2	E2	E2	E2	J2	E2
HG01107	E2a	2.18189	E	E	IJ	IJ	IJ	H	E	O	H	O	R	O	E	E	E	E	E	E	E	E	E	E	E	G	E	E	E	E	E	E	E	E	E	E	E	E	E2	E2	E2	E2	E2	E2	E2	E2	E2	E2	R1b
HG01308	E2a	1.84693	E	E	IJ	IJ	IJ	IJ	IJ	H	O	O	E	O	E	E	E	E	E	E	E	E	E	E	E	O	E	E	E	E	E	E	E	E	E	E	E	E	E2	E2	E2	E2	E2	E2	E2	E2	E2	E2	E2
NA19200	E2a	1.84157	E	E	E	E	E	E	E	E	E	E	E	E	E	E	E	E	E	E	E	E	E	E	E	G	E	E	E	E	E	E	E	E	E	E	Q	O	E2	E1	E1	E1	E1	E1	E1	E1	E1	E1	E1
NA20510	E2a	2.45607	E	E	E	IJ	IJ	IJ	E	O	E	IJ	E	E	E	E	E	E	E	E	E	E	E	E	E	R	E	E	E	E	E	E	E	E	E	E	E	H	E2	E2	E2	E2	E2	E2	E2	E2	E2	E2	E2
NA20516	E2a	2.62154	E	E	IJ	IJ	IJ	IJ	IJ	E	E	C	O	C	E												E	E	E	E	E	E	E	E	E	E	H	G	E2	E2	E2	E2	E2	E2	E2	E2	E2	E2	E2
NA20528	E2a	2.33581	E	E	E	IJ	IJ	H	E	O	H	H	H	G	E	E	E	E	E	E	E	E	E	E	E	R	E	E	E	E	E	E	E	E	E	E	E	N	E2	E2	E2	E2	E2	E2	E2	E2	E2	E2	O25
HG01200	E2a	1.95581	E	E	IJ	IJ	IJ	IJ	IJ	H	E	H	IJ	AB	E	E	E	E	E	E	E	E	E	E	E	E	E	E	E	E	E	E	E	E	E	E	E	G	E2	E2	E2	E2	E2	E2	E2	E2	E2	E2	O6
HG02768	E2a	4.0962	E	E	E	IJ	IJ	IJ	IJ	H	H	O	G	H	E	E	E	E	E	E	E	E	E	E	H	E	E	E	E	E	E	E	E	E	E	E	E	H	E2	E1	E1	E1	E1	E1	E1	E1	E1	E1	C
HG03130	E2a	1.77894	E	E	E	IJ	IJ	E	E	E	E	O	G	H	E	E	E	E	E	E	E	E	E	E	E	H	E	E	E	E	E	E	E	E	E	E	E	E	E2	E1	E1	E1	E1	E1	E1	E1	E1	E1	E1
HG03559	E2a	2.18775	E	E	E	E	IJ	E	E	E	H	G	R	O	E	E	E	E	E	E	E	E	E	E	R	Q	E	E	E	E	E	E	E	E	E	E	E	H	E2	E1	E1	E1	E1	E1	E1	E1	E1	E1	E1
HG01497	E2a	1.67342	E	E	E	IJ	IJ	IJ	IJ	H	O	H	N	H	E	E	E	E	E	E	E	E	E	E	E	H	E	E	E	E	E	E	E	E	E	E	C	E	E2	E2	E2	E2	E2	E2	E2	E2	E2	E2	E2
HG01970	E2a	4.95433	E	E	E	IJ	E	H	H	H	E	H	H	N	E	E	E	E	E	E	E	E	E	E	C	E	E	E	E	E	E	E	E	E	E	E	E	O	E2	E2	E2	E2	E2	E2	E2	E2	E2	E2	E2
NA19309	E2a	2.59419	E	E	E	IJ	IJ	IJ	E	E	IJ	G	N	O	E	E	E	E	E	E	E	E	E	E	E	G	E	E	E	E	E	E	E	E	E	E	R	R	E2	E2	E2	E2	E2	E2	E2	E2	E2	E2	E4
NA20544	E2a	2.11195	E	E	IJ	IJ	IJ	E	IJ	H	E	H	IJ	H	E	E	E	E	E	E	E	E	E	E	E	E	E	E	E	E	E	E	E	E	E	O	E	R	E2	E2	E2	E2	E2	E2	E2	E2	E2	H	E1
HG01680	E2b	2.9096	E	E	E	IJ	E	E	E	O	E	G	N	H	E	E	E	E	E	E	E	E	E	E	E	O	E	E	E	E	E	E	E	E	E	E	E	O	E2	E2	E2	E2	E2	E2	E2	E2	E2	E2	E2
HG01699	E2b	3.76173	E	E	E	E	IJ	IJ	H	H	H	E	O	IJ	E	E	E	E	E	E	E	E	E	E	R	E	E	E	E	E	E	E	E	E	E	O	E	E	E2	E2	E2	E2	E2	E2	E2	E2	E2	E2	E2
HG02150	E2b	3.16766	E	E	E	IJ	IJ	IJ	IJ	IJ	H	O	O	O	E	E	E	E	E	E	E	E	E	E	E	C	E	E	E	E	E	E	E	E	E	E	H	LT	E2	E2	E2	E2	E2	E2	E2	E2	E2	E2	E2
HG02317	E2b	2.89385	E	E	E	IJ	IJ	IJ	E	E	R	O	O	H	E	E	E	E	E	E	E	E	E	E	E	C	E	E	E	E	E	E	E	E	E	E	E	IJ	E2	E2	E2	E2	E2	E2	E2	E2	E2	E2	J2
HG02798	E2b	4.02361	E	E	IJ	IJ	IJ	IJ	IJ	H	O	H	O	H	E	E	E	E	E	E	E	E	E	E	E	N	E	E	E	E	E	E	E	E	E	E	E	O	E2	E2	E2	E2	E2	E2	E2	E2	E2	E2	AB
NA19676	E2b	2.43068	E	IJ	IJ	IJ	IJ	IJ	H	E	H	H	O	E	E	E	E	E	E	E	E	E	E	E	E	G	E	E	E	E	E	E	E	E	E	AB	E	H	E2	E2	E2	E2	E2	E2	E2	E2	E2	E2	E2
NA19759	E2b	1.95559	E	E	E	E	IJ	E	E	G	H	O	N	G	E	E	E	E	E	E	E	E	E	E	E	E	E	E	E	E	E	E	E	E	E	E	E	E	E2	E2	E2	E2	E2	E2	E2	E2	E2	E2	J2
NA19792	E2b	3.97806	E	E	E	IJ	IJ	IJ	E	IJ	O	O	C	O	E												E	E	E	E	E	E	E	E	E	E	E	G	E2	E2	E2	E2	E2	E2	E2	E2	E2	E2	E2
HG01110	E2b	3.29135	E	E	E	IJ	IJ	IJ	IJ	O	O	O	H	O	E	E	E	E	E	E	E	E	E	E	E	LT	E	E	E	E	E	E	E	E	E	E	E	AB	E2	E2	E2	E2	E2	E2	E2	E2	E2	E2	E4
HG01112	E2b	1.85703	E	E	E	IJ	IJ	E	E	H	O	H	H	O	E	E	E	E	E	E	E	E	E	H	E	AB	E	E	E	E	E	E	E	E	E	E	G	E	E2	E2	E2	E2	E2	E2	E2	E2	E2	E2	H
HG01250	E2b	1.82641	E	E	IJ	IJ	E	E	H	O	H	O	H	O	E	E	E	E	E	E	E	E	E	E	R	G	E	E	E	E	E	E	E	E	E	E	E	E	E2	E2	E2	E2	E2	E2	E2	E2	E2	E2	E2
HG01325	E2b	2.21576	E	E	E	IJ	E	E	IJ	H	H	O	E	N	E	E	E	E	E	E	E	E	E	E	H	E	E	E	E	E	E	E	E	E	E	E	E	C	E2	E2	E2	E2	E2	E2	E2	E2	E2	E2	E2
HG01455	E2b	1.56565	E	E	IJ	IJ	IJ	IJ	H	H	H	E	O	G	E	E	E	E	E	E	E	E	E	E	H	E	E	E	E	E	E	E	E	E	E	E	C	C	E2	E2	E2	E2	E2	E2	E2	E2	E2	E2	E2
NA19311	E2b	1.83424	E	IJ	IJ	IJ	IJ	IJ	IJ	IJ	O	H	N	H	E	E	E	E	E	E	E	E	E	H	E	O	E	E	E	E	E	E	E	E	E	H	E	E	E2	E2	E2	E2	E2	E2	E2	E2	E2	E2	E4
NA19331	E2b	1.93479	E	E	IJ	IJ	IJ	IJ	H	O	H	O	O	N	E	E	E	E	E	E	E	E	E	H	E	E	E	E	E	E	E	E	E	E	E	E	C	R	E2	E2	E2	E2	E2	E2	E2	E2	E2	E2	E2
NA19334	E2b	2.06828	E	IJ	IJ	IJ	IJ	IJ	IJ	H	O	G	H	O	E												E	E	E	E	E	E	E	E	E	E	H	N	E2	E2	E2	E2	E2	E2	E2	E2	E2	E2	E2
HG01088	E2c	2.14694	E	E	E	E	E	IJ	E	H	E	H	E	O	E	E	E	E	E	E	E	E	E	E	H	R	E	E	E	E	E	E	E	E	E	E	E	IJ	E2	E2	E2	E2	E2	E2	E2	E2	E2	E2	E2
HG01104	E2c	2.92832	E	E	E	E	E	IJ	E	H	E	E	H	G	E	E	E	E	E	E	E	E	E	E	E	O	E	E	E	E	E	E	E	E	E	E	E	O	E2	E2	E2	E2	E2	E2	E2	E2	E2	E2	E2
HG01161	E2c	2.34824	E	E	E	IJ	IJ	IJ	IJ	O	O	H	O	R	E	E	E	E	E	E	E	E	E	E	E	E	E	E	E	E	E	E	E	E	E	H	LT	E	E2	E2	E2	E2	E2	E2	E2	E2	E2	E2	E4
HG02771	E3	3.78671	E	IJ	IJ	IJ	IJ	IJ	IJ	H	H	O	N	G	E	E	E	E	E	E	E	E	E	E	E	E	E	E	E	E	E	E	E	E	E	E	E	R	NA
NA19035	E3	2.86719	E	IJ	IJ	IJ	IJ	IJ	E	IJ	H	O	H	G	E	E	E	E	E	E	E	E	E	E	E	C	E	E	E	E	E	E	E	E	E	LT	AB	E	NA
NA19175	E3	2.58595	E	IJ	IJ	IJ	IJ	IJ	IJ	H	IJ	O	H	E	E	E	E	E	E	E	E	E	E	E	E	E	E	E	E	E	E	E	E	E	E	E	E	C	NA
NA19380	E3	2.16294	E	E	E	IJ	IJ	IJ	E	E	IJ	O	O	O	E	E	E	E	E	E	E	E	E	E	H	E	E	E	E	E	E	E	E	E	E	AB	E	E	NA
NA20348	E3	1.92708	E	E	E	E	IJ	IJ	E	H	O	E	H	R	E												E	E	E	E	E	E	E	E	E	E	G	C	NA
HG01094	E4	2.31236	E	E	E	E	E	E	IJ	H	E	E	E	H	E	E	E	E	E	E	E	E	E	E	E	G	E	E	E	E	E	E	E	E	E	E	H	Q	E4	E4	E4	E4	E4	E4	E4	E4	E4	E4	E4
HG01882	E4	3.66584	E	E	IJ	IJ	IJ	IJ	IJ	E	E	H	O	H	E												E	E	E	E	E	E	E	E	E	E	C	AB	E4	E4	E4	E4	E4	E4	E4	E4	E4	E4	E4
HG02449	E4	2.28487	E	E	E	IJ	IJ	IJ	E	E	O	O	R	H	E												E	E	E	E	E	E	E	E	E	LT	E	R	E4	E4	E4	E4	E4	E4	E4	E4	E4	G	Q1
HG02461	E4	3.73822	E	E	IJ	IJ	IJ	IJ	IJ	H	O	O	O	N	E	E	E	E	E	E	E	E	E	C	E	C	E	E	E	E	E	E	E	E	E	E	E	H	E4	E4	E4	E4	E4	E4	E4	E4	E4	E4	E4
HG02570	E4	4.07799	E	IJ	IJ	IJ	IJ	IJ	IJ	E	H	G	E	H	E	E	E	E	E	E	E	E	E	C	C	G	E	E	E	E	E	E	E	E	E	E	E	H	E4	E4	E4	E4	E4	E4	E4	E4	E4	E4	E4
HG02623	E4	5.54143	E	IJ	IJ	IJ	IJ	E	E	G	H	G	O	O	E	E	E	E	E	E	E	E	E	E	H	E	E	E	E	E	E	E	E	E	E	E	E	C	E4	E4	E4	E4	E4	E4	E4	E4	E4	E4	E4
HG02634	E4	3.99708	E	IJ	IJ	IJ	IJ	E	H	H	IJ	O	H	O	E	E	E	E	E	E	E	E	E	E	E	C	E	E	E	E	E	E	E	E	E	E	E	E	E4	E4	E4	E4	E4	E4	E4	E4	E4	R2	E4
HG02810	E4	4.31297	E	IJ	IJ	IJ	IJ	IJ	IJ	H	IJ	O	E	E	E	E	E	E	E	E	E	E	E	E	E	E	E	E	E	E	E	E	E	E	E	E	E	E	E4	E4	E4	E4	E4	E4	E4	E4	E4	H	O6
HG02819	E4	1.79198	E	E	IJ	IJ	IJ	IJ	E	H	H	E	H	LT	E	E	E	E	E	E	E	E	E	E	E	E	E	E	E	E	E	E	E	E	E	E	E	H	E4	E4	E4	E4	E4	E4	E4	E4	E4	E4	E4
HG03024	E4	2.78729	E	E	E	IJ	IJ	IJ	IJ	O	H	O	O	C	E	E	E	E	E	E	E	E	E	E	E	H	E	E	E	E	E	E	E	E	E	E	E	G	E4	E4	E4	E4	E4	E4	E4	E4	E4	E4	C
HG03027	E4	4.61748	E	IJ	IJ	IJ	IJ	IJ	IJ	H	O	O	H	H	E	E	E	E	E	E	E	E	E	E	E	H	E	E	E	E	E	E	E	E	E	E	E	C	E4	E4	E4	E4	E4	E4	E4	E4	E4	E4	E4
HG03048	E4	4.272	E	IJ	IJ	IJ	IJ	H	E	H	H	O	O	O	E	E	E	E	E	E	E	E	E	E	E	E	E	E	E	E	E	E	E	E	E	E	E	AB	E4	E4	E4	E4	E4	E4	E4	E4	E4	E4	O25
HG03096	E4	4.13349	E	IJ	IJ	IJ	IJ	IJ	O	H	H	H	E	E	E	E	E	E	E	E	E	E	E	E	IJ	E	E	E	E	E	E	E	E	E	E	E	E	H	E4	E4	E4	E4	E4	E4	E4	E4	E4	E4	E2
HG03246	E4	2.27465	E	E	E	IJ	IJ	IJ	E	E	H	H	Q	O	E	E	E	E	E	E	E	E	E	E	E	E	E	E	E	E	E	E	E	E	E	E	C	C	E4	E4	E4	E4	E4	E4	E4	E4	E4	E4	E4
HG03258	E4	3.60676	E	IJ	IJ	IJ	IJ	IJ	H	H	O	O	H	O	E	E	E	E	E	E	E	E	E	AB	AB	AB	E	E	E	E	E	E	E	E	E	E	H	C	E4	E4	E4	E4	E4	E4	E4	E4	E4	E4	E4
HG03439	E4	2.78118	E	E	E	IJ	IJ	IJ	H	H	E	H	H	H	E												E	E	E	E	E	E	E	E	E	E	E	Q	E4	E4	E4	E4	E4	E4	E4	E4	E4	E4	R1b
NA18856	E4		E												E												E												E4
NA18910	E4	1.96383	E	IJ	IJ	IJ	IJ	IJ	IJ	H	IJ	H	H	H	E	E	E	E	E	E	E	E	E	E	E	H	E	E	E	E	E	E	E	E	E	E	E	G	E4	E4	E4	E4	E4	E4	E4	E4	E4	H	E2
NA19189	E4		E												E												E												E4
NA19239	E4	1.71889	E	E	E	E	IJ	E	IJ	IJ	E	O	E	H	E												E	E	E	E	E	E	E	E	E	E	E	C	E4	E4	E4	E4	E4	E4	E4	E4	E4	E4	E4
HG02040	F	1.94939	NA												NA												NA												NA
NA20767	G	3.303	G	G	G	G	G	G	IJ	G	G	O	H	G	G	G	G	G	G	G	G	G	G	G	H	H	G	G	G	G	G	G	G	G	G	G	G	G	G	G	G	G	G	G	G	G	H	G	G
NA20858	G1	1.53606	G	G	G	G	G	IJ	H	H	H	H	H	H	G	G	G	G	G	G	G	G	G	G	G	O	G	G	G	G	G	G	G	G	G	O	O	G	G	G	G	G	G	G	G	G	H	G	O6
NA20870	G1	1.58895	G	G	G	IJ	G	G	IJ	O	H	H	O	N	G	G	G	G	G	G	G	G	G	H	G	O	G	G	G	G	G	G	G	G	G	G	H	G	G	G	G	G	G	G	G	G	G	G	H
HG03708	G2a	2.66891	G	G	G	G	G	G	G	G	G	N	H	G	G	G	G	G	G	G	G	G	G	G	G	G	G	G	G	G	G	G	G	G	G	G	G	N	G	G	G	G	G	G	G	G	G	H	H
HG01097	G2a	1.83115	G	G	G	G	G	G	G	G	H	G	H	H	G	G	G	G	G	G	G	G	G	G	G	IJ	G	G	G	G	G	G	G	G	G	G	G	H	G	G	G	G	G	G	G	G	G	G	G
HG01512	G2a	1.62048	G	G	G	G	G	G	G	G	G	G	O	N	G	G	G	G	G	G	G	G	G	G	H	R	G	G	G	G	G	G	G	G	G	G	G	O	G	G	G	G	G	G	G	G	G	G	G
HG02224	G2a	1.14814	G	G	G	G	G	IJ	IJ	G	G	G	G	H	G	G	G	G	G	G	G	G	G	G	G	R	G	G	G	G	G	G	G	G	G	G	G	H	G	G	G	G	G	G	G	G	G	G	I1
HG02687	G2a	4.0046	G	G	G	G	G	G	G	IJ	O	O	O	O	G	G	G	G	G	G	G	G	G	G	H	H	G	G	G	G	G	G	G	G	G	G	G	H	G	G	G	G	G	G	G	G	G	H	G
HG03577	G2a	3.48446	G	G	G	G	G	G	G	G	G	O	H	O	G	G	G	G	G	G	G	G	G	G	H	H	G	G	G	G	G	G	G	G	G	G	G	G	G	G	G	G	G	G	G	G	G	G	G
NA12546	G2a	3.03443	G	G	G	G	G	G	G	G	G	G	G	IJ	G	G	G	G	G	G	G	G	G	G	G	G	G	G	G	G	G	G	G	G	G	G	H	G	G	G	G	G	G	G	G	G	G	G	G
NA12777	G2a	3.1633	G	G	G	G	G	G	G	G	G	O	H	O	G												G	G	G	G	G	G	G	G	G	G	G	H	G	G	G	G	G	G	G	G	G	G	Q1
NA18549	G2a	2.79294	G	G	G	G	G	G	G	G	H	H	O	O	G	G	G	G	G	G	G	G	G	G	G	E	G	G	G	G	G	G	G	G	G	G	G	R	G	G	G	G	G	G	G	G	G	G	G
NA19670	G2a	2.39527	G	G	G	G	G	G	G	G	O	G	H	O	G	G	G	G	G	G	G	G	G	G	G	Q	G	G	G	G	G	G	G	G	G	G	G	G	G	G	G	G	G	G	G	G	G	G	H
NA19747	G2a	1.44621	G	G	G	G	G	G	G	G	G	G	H	H	G	G	G	G	G	G	G	G	G	H	G	H	G	G	G	G	G	G	G	G	G	G	G	R	G	G	G	G	G	G	G	G	G	G	G
NA20536	G2a	2.18866	G	G	G	G	G	G	G	G	H	H	G	AB	G	G	G	G	G	G	G	G	G	G	G	O	G	G	G	G	G	G	G	G	G	G	G	E	G	G	G	G	G	G	G	G	G	G	G
NA12286	G2a	2.69002	G	G	G	G	G	G	G	G	H	O	N	N	G	G	G	G	G	G	G	G	G	G	G	LT	G	G	G	G	G	G	G	G	G	G	G	H	G	G	G	G	G	G	G	G	G	G	G
HG01311	G2a	2.07643	G	G	G	G	G	G	G	G	G	H	N	O	G	G	G	G	G	G	G	G	G	G	G	H	G	G	G	G	G	G	G	G	G	G	R	H	G	G	G	G	G	G	G	G	G	G	G
HG02681	G2a	2.74789	G	G	G	G	G	G	G	O	G	H	G	N	G	G	G	G	G	G	G	G	G	G	G	Q	G	G	G	G	G	G	G	G	G	G	G	G	G	G	G	G	G	G	G	G	G	G	O6
HG02789	G2b1	4.03544	G	G	G	G	G	G	G	G	G	H	AB	R	G	G	G	G	G	G	G	G	G	G	G	O	G	G	G	G	G	G	G	G	G	G	G	G	G	G	G	G	G	G	G	G	G	G	G
HG01583	H1a	1.97401	H	H	H	H	H	H	H	H	H	O	G	O	H	H	H	H	H	H	H	H	H	H	H	O	H	H	H	H	H	H	H	H	H	H	H	AB	H	H	H	H	H	H	H	H	H	H	H
HG02786	H1a	3.79079	H	H	H	H	H	H	H	H	H	H	H	R	H												H	H	H	H	H	H	H	H	H	H	H	H	H	H	H	H	H	H	H	H	H	H	H
HG03009	H1a	2.20557	H	H	H	H	H	H	H	H	H	O	H	R	H	H	H	H	H	H	H	H	H	H	H	R	H	H	H	H	H	H	H	H	H	H	H	H	H	H	H	H	H	H	H	H	H	H	H
HG03600	H1a	3.13194	H	H	H	H	H	H	H	H	H	H	H	O	H												H	H	H	H	H	H	H	H	H	O	H	E	H	H	H	H	H	H	H	H	H	H	H
HG03644	H1a	4.68484	H	H	H	H	H	H	H	H	H	H	H	AB	H	H	H	H	H	H	H	H	H	H	H	C	H	H	H	H	H	H	H	H	H	H	H	Q	H	H	H	H	H	H	H	H	H	H	O1
HG03646	H1a	2.14866	H	H	H	H	H	H	H	H	H	H	H	N	H	H	H	H	H	H	H	H	H	R	H	H	H	H	H	H	H	H	H	H	H	H	H	H	H	H	H	H	H	H	H	H	H	R2	O6
HG03716	H1a	4.16759	H	H	H	H	H	IJ	IJ	H	O	H	O	H	H	H	H	H	H	H	H	H	H	H	G	IJ	H	H	H	H	H	H	H	H	H	H	H	Q	H	H	H	H	H	H	H	H	H	H	H
HG03738	H1a	2.27408	H	H	H	H	H	H	H	H	H	H	H	O	H	H	H	H	H	H	H	H	H	H	G	R	H	H	H	H	H	H	H	H	H	H	H	AB	H	H	H	H	H	H	H	H	H	H	R1b
HG03745	H1a	2.41419	H	H	H	H	H	H	H	H	H	H	H	H	H	H	H	H	H	H	H	H	H	IJ	O	H	H	H	H	H	H	H	H	H	H	H	H	H	H	H	H	H	H	H	H	H	H	H	H
HG03755	H1a	2.92031	H	H	H	H	H	H	H	H	H	H	H	H	H	H	H	H	H	H	H	H	H	G	H	R	H	H	H	H	H	H	H	H	H	H	O	H	H	H	H	H	H	H	H	H	H	H	H
HG03777	H1a	2.49215	H	H	H	H	H	H	H	H	H	H	R	H	H	H	H	H	H	H	H	H	H	H	O	H	H	H	H	H	H	H	H	H	H	H	H	E	H	H	H	H	H	H	H	H	H	O25	H
HG03778	H1a	2.64567	H	H	H	H	H	H	H	IJ	H	H	R	O	H												H	H	H	H	H	H	H	H	H	H	H	LT	H	H	H	H	H	H	H	H	H	H	H
HG03800	H1a	3.74774	H	H	H	H	H	H	IJ	H	H	H	H	H	H	H	H	H	H	H	H	H	H	H	O	AB	H	H	H	H	H	H	H	H	H	H	G	Q	H	H	H	H	H	H	H	H	H	H	H
HG03812	H1a	2.00597	H	H	H	H	H	H	IJ	H	H	H	H	H	H												H	H	H	H	H	H	H	H	H	H	G	G	H	H	H	H	H	H	H	H	H	H	H
HG03815	H1a	3.65754	H	H	H	H	H	H	H	H	H	H	H	O	H	H	H	H	H	H	H	H	H	H	H	R	H	H	H	H	H	H	H	H	H	H	H	H	H	H	H	H	H	H	H	H	H	H	I1
HG03824	H1a	3.22078	H	H	H	H	H	H	H	H	H	H	H	AB	H	H	H	H	H	H	H	H	H	H	H	H	H	H	H	H	H	H	H	H	H	H	H	R	H	H	H	H	H	H	H	H	H	H	O6
HG03846	H1a	1.83227	H	H	H	H	H	H	H	H	IJ	H	H	IJ	H	H	H	H	H	H	H	H	H	H	H	G	H	H	H	H	H	H	H	H	O	H	H	O	H	H	H	H	H	H	H	H	H	H	H
HG03941	H1a	3.27303	H	H	H	H	H	H	H	H	H	H	AB	H	H	H	H	H	H	H	H	H	H	H	H	H	H	H	H	H	H	H	H	H	H	O	H	G	H	H	H	H	H	H	H	H	H	H	H
HG03950	H1a	3.84032	H	H	H	H	H	H	IJ	H	H	O	H	Q	H	H	H	H	H	H	H	H	H	H	H	H	H	H	H	H	H	H	H	H	H	H	H	H	H	H	H	H	H	H	H	H	H	H	O1
HG03985	H1a	1.97954	H	H	H	H	H	H	H	H	H	H	H	O	H	H	H	H	H	H	H	H	H	H	Q	E	H	H	H	H	H	H	H	H	H	H	H	H	H	H	H	H	H	H	H	H	H	H	LT
HG04002	H1a	2.29653	H	H	H	H	H	H	H	H	H	H	O	R	H	H	H	H	H	H	H	H	H	H	H	R	H	H	H	H	H	H	H	H	H	H	O	R	H	H	H	H	H	H	H	H	H	H	H
HG04006	H1a	4.10377	H	H	H	H	H	H	H	H	IJ	H	H	H	H												H	H	H	H	H	H	H	H	H	H	H	R	H	H	H	H	H	H	H	H	H	H	I1
HG04060	H1a	2.15787	H	H	H	H	H	H	H	H	H	Q	H	H	H												H	H	H	H	H	H	H	H	H	H	H	H	H	H	H	H	H	H	H	H	H	H	H
HG04061	H1a	1.93234	H	H	H	H	H	H	H	H	H	H	H	H	H	H	H	H	H	H	H	H	H	H	H	IJ	H	H	H	H	H	H	H	H	H	H	H	H	H	H	H	H	H	H	H	H	H	H	H
HG04146	H1a	2.16195	H	H	H	H	H	H	H	H	H	H	O	R	H	H	H	H	H	H	H	H	H	H	H	G	H	H	H	H	H	H	H	H	H	H	H	Q	H	H	H	H	H	H	H	H	H	H	H
HG04161	H1a	3.23517	H	H	H	H	H	H	H	H	H	N	H	H	H	H	H	H	H	H	H	H	H	O	H	H	H	H	H	H	H	H	H	H	H	H	H	IJ	H	H	H	H	H	H	H	H	H	H	H
HG04164	H1a	3.05842	H	H	H	H	H	IJ	H	H	H	H	N	O	H	H	H	H	H	H	H	H	H	C	H	N	H	H	H	H	H	H	H	H	H	H	H	H	H	H	H	H	H	H	H	H	H	H	AB
HG04176	H1a	3.00828	H	H	H	H	H	H	H	H	H	H	R	N	H	H	H	H	H	H	H	H	H	H	H	R	H	H	H	H	H	H	H	H	H	H	H	R	H	H	H	H	H	H	H	H	H	H	H
HG04185	H1a	1.80663	H	H	H	H	H	H	H	H	H	H	H	Q	H	H	H	H	H	H	H	H	H	H	G	H	H	H	H	H	H	H	H	H	H	H	H	H	H	H	H	H	H	H	H	H	H	H	H
HG04188	H1a	3.00246	H	H	H	H	H	IJ	H	H	H	H	H	H	H	H	H	H	H	H	H	H	H	H	H	N	H	H	H	H	H	H	H	H	H	H	H	C	H	H	H	H	H	H	H	H	H	H	O6
HG04198	H1a	3.16608	H	IJ	IJ	IJ	IJ	H	IJ	IJ	H	O	E	AB	H	H	H	H	H	H	H	H	H	H	G	H	H	H	H	H	H	H	H	H	H	H	H	Q	H	H	H	H	H	H	H	H	H	LT	H
HG04206	H1a	3.03315	H	H	H	H	H	H	H	H	H	H	C	Q	H	H	H	H	H	H	H	H	H	H	H	LT	H	H	H	H	H	H	H	H	H	H	H	E	H	H	H	H	H	H	H	H	H	H	H
HG04211	H1a	2.74174	H	H	H	H	H	IJ	H	H	H	G	H	H	H	H	H	H	H	H	H	H	H	LT	H	O	H	H	H	H	H	H	H	H	H	H	H	O	H	H	H	H	H	H	H	H	H	H	O6
HG04222	H1a	3.28544	H	IJ	IJ	IJ	IJ	IJ	IJ	IJ	H	O	O	O	H	H	H	H	H	H	H	H	H	O	H	N	H	H	H	H	H	H	H	H	H	H	R	R	H	H	H	H	H	H	H	H	H	H	I2
HG04235	H1a	2.88209	H	H	H	H	H	H	H	H	H	H	H	O	H	H	H	H	H	H	H	H	H	H	O	R	H	H	H	H	H	H	H	H	H	H	H	H	H	H	H	H	H	H	H	H	H	H	H
NA20863	H1a	2.88083	H	H	H	H	H	H	H	H	H	H	H	C	H	H	H	H	H	H	H	H	H	H	H	H	H	H	H	H	H	H	H	H	H	H	H	IJ	H	H	H	H	H	H	H	H	H	H	H
NA20871	H1a	1.81406	H	H	H	H	H	H	H	H	H	H	H	R	H	H	H	H	H	H	H	H	H	H	O	H	H	H	H	H	H	H	H	H	H	H	H	H	H	H	H	H	H	H	H	H	H	H	I1
NA20901	H1a	2.5906	H	H	H	H	H	H	H	H	H	H	H	H	H	H	H	H	H	H	H	H	H	H	H	IJ	H	H	H	H	H	H	H	H	H	H	R	H	H	H	H	H	H	H	H	H	H	H	H
NA21087	H1a	2.13512	H	H	H	H	H	H	H	H	H	H	H	H	H	H	H	H	H	H	H	H	H	H	H	H	H	H	H	H	H	H	H	H	H	H	H	AB	H	H	H	H	H	H	H	H	H	H	O1
NA21093	H1a	2.70017	H	H	H	H	H	H	H	H	H	O	H	H	H	H	H	H	H	H	H	H	H	H	R	Q	H	H	H	H	H	H	H	H	H	H	H	H	H	H	H	H	H	H	H	H	H	H	O1
NA21099	H1a	1.22555	H	H	H	H	H	H	H	H	H	O	H	O	H	H	H	H	H	H	H	H	H	H	H	H	H	H	H	H	H	H	H	H	H	H	H	H	H	H	H	H	H	H	H	H	H	H	R2
NA21107	H1a	2.87565	H	H	H	H	H	H	H	H	H	H	H	IJ	H												H	H	H	H	H	H	H	H	H	H	H	H	H	H	H	H	H	H	H	H	H	R1b	O25
NA21111	H1a	2.75934	H	H	H	H	H	H	H	H	H	H	O	H	H	H	H	H	H	H	H	H	H	H	O	C	H	H	H	H	H	H	H	H	H	H	H	C	H	H	H	H	H	H	H	H	H	H	O25
NA21112	H1a	3.26991	H	H	H	H	H	H	H	H	H	O	H	H	H	H	H	H	H	H	H	H	H	H	H	H	H	H	H	H	H	H	H	H	H	H	H	N	H	H	H	H	H	H	H	H	H	H	O6
NA21113	H1a	2.6098	H	H	H	H	H	H	H	H	H	H	H	O	H	H	H	H	H	H	H	H	H	H	O	R	H	H	H	H	H	H	H	H	H	H	R	H	H	H	H	H	H	H	H	H	H	H	R1b
NA21116	H1a	3.19561	H	H	H	H	H	H	H	H	H	H	H	O	H	H	H	H	H	H	H	H	H	H	H	H	H	H	H	H	H	H	H	H	H	H	O	R	H	H	H	H	H	H	H	H	H	H	H
NA21126	H1a	3.92903	H	H	H	H	H	H	H	H	H	H	H	H	H	H	H	H	H	H	H	H	H	H	E	G	H	H	H	H	H	H	H	H	H	H	O	N	H	H	H	H	H	H	H	H	H	H	H
HG03594	H1b	2.62205	H	H	H	H	H	IJ	H	H	H	H	H	N	H	H	H	H	H	H	H	H	H	H	H	Q	H	H	H	H	H	H	H	H	H	H	H	N	H	H	H	H	H	H	H	H	H	H	H
HG03809	H1b	1.92467	H	H	H	H	IJ	H	IJ	H	H	H	H	AB	H	H	H	H	H	H	H	H	H	H	O	H	H	H	H	H	H	H	H	H	H	H	H	H	H	H	H	H	H	H	H	H	H	H	H
HG03991	H1b	2.11568	H	H	H	H	H	H	H	H	O	H	O	G	H	H	H	H	H	H	H	H	H	H	H	H	H	H	H	H	H	H	H	H	H	H	H	G	H	H	H	H	H	H	H	H	H	H	H
HG03680	H3	4.02201	H	H	H	H	H	H	H	H	H	H	H	G	H	H	H	H	H	H	H	H	H	H	H	H	H	H	H	H	H	H	H	H	H	H	H	LT	H	H	H	H	H	H	H	H	H	H	O25
HG03792	H3	2.31604	H	H	H	H	H	H	H	H	H	H	H	H	H												H	H	H	H	H	H	H	H	H	H	H	H	H	H	H	H	H	H	H	H	H	H	H
HG03837	H3	2.75766	H	H	H	H	H	H	H	H	H	O	H	O	H	H	H	H	H	H	H	H	H	H	H	R	H	H	H	H	H	H	H	H	H	H	H	H	H	H	H	H	H	H	H	H	H	H	H
HG03848	H3	2.33473	H	H	H	H	H	H	H	H	O	H	H	H	H	H	H	H	H	H	H	H	H	H	H	R	H	H	H	H	H	H	H	H	H	H	IJ	LT	H	H	H	H	H	H	H	H	H	H	H
HG03870	H3	2.20679	H	H	H	H	H	H	H	H	H	H	H	O	H	H	H	H	H	H	H	H	H	H	H	IJ	H	H	H	H	H	H	H	H	H	H	H	H	H	H	H	H	H	H	H	H	H	H	H
HG03872	H3	2.86192	H	H	H	H	H	H	H	H	H	H	H	H	H	H	H	H	H	H	H	H	H	H	H	H	H	H	H	H	H	H	H	H	H	H	H	G	H	H	H	H	H	H	H	H	H	H	H
HG03965	H3	3.20634	H	H	H	H	H	H	H	H	H	H	N	G	H	H	H	H	H	H	H	H	H	H	IJ	H	H	H	H	H	H	H	H	H	H	H	H	G	H	H	H	H	H	H	H	H	H	H	H
HG04033	H3	1.98901	H	H	H	H	H	H	IJ	H	H	H	H	N	H	H	H	H	H	H	H	H	H	H	H	O	H	H	H	H	H	H	H	H	H	H	H	O	H	H	H	H	H	H	H	H	H	H	H
HG04238	H3	3.04102	H	H	H	H	H	H	H	H	H	O	H	O	H												H	H	H	H	H	H	H	H	H	H	H	H	H	H	H	H	H	H	H	H	H	H	H
HG02684	H3	3.57008	H	H	H	H	H	H	H	H	H	H	H	AB	H												H	H	H	H	H	H	H	H	H	H	H	H	H	H	H	H	H	H	H	H	H	H	H
HG03697	H3	2.48753	H	H	H	H	H	H	H	H	H	O	H	H	H	H	H	H	H	H	H	H	H	H	H	Q	H	H	H	H	H	H	H	H	H	H	H	H	H	H	H	H	H	H	H	H	H	H	H
HG03890	H3	2.75674	H	H	H	H	H	H	H	H	H	H	O	O	H	H	H	H	H	H	H	H	H	H	H	Q	H	H	H	H	H	H	H	H	H	H	H	C	H	H	H	H	H	H	H	H	H	H	H
HG00117	I1z	1.93638	IJ	IJ	IJ	IJ	IJ	IJ	IJ	IJ	IJ	O	H	O	IJ	IJ	IJ	IJ	IJ	IJ	IJ	IJ	IJ	R	H	H	IJ	IJ	IJ	IJ	IJ	IJ	IJ	IJ	IJ	H	H	LT	I1	I1	I1	I1	I1	I1	I1	I1	I1	I1	H
HG00140	I1z	3.56371	IJ	IJ	IJ	IJ	IJ	IJ	IJ	IJ	H	IJ	O	Q	IJ	IJ	IJ	IJ	IJ	IJ	IJ	IJ	IJ	IJ	IJ	O	IJ	IJ	IJ	IJ	IJ	IJ	IJ	IJ	IJ	H	IJ	IJ	I1	I1	I1	I1	I1	I1	I1	I1	I1	I1	I1
HG00310	I1a	1.80918	IJ	IJ	IJ	IJ	IJ	IJ	IJ	O	IJ	IJ	H	N	IJ	IJ	IJ	IJ	IJ	IJ	IJ	IJ	IJ	H	H	H	IJ	IJ	IJ	IJ	IJ	IJ	IJ	IJ	IJ	IJ	O	H	I1	I1	I1	I1	I1	I1	I1	I1	I1	I1	I1
NA07051	I1c	1.06373	IJ	IJ	IJ	IJ	IJ	IJ	IJ	H	H	H	H	O	IJ	IJ	IJ	IJ	IJ	IJ	IJ	IJ	IJ	IJ	IJ	R	IJ	IJ	IJ	IJ	IJ	IJ	IJ	IJ	IJ	IJ	H	G	I1	I1	I1	I1	I1	I1	I1	I1	I1	I1	O25
NA11893	I1c	2.32794	IJ	IJ	IJ	IJ	IJ	IJ	IJ	H	H	H	O	O	IJ	IJ	IJ	IJ	IJ	IJ	IJ	IJ	IJ	H	IJ	C	IJ	IJ	IJ	IJ	IJ	IJ	IJ	IJ	H	IJ	H	IJ	I1	I1	I1	I1	I1	I1	I1	I1	I1	H	I1
NA11919	I1a	4.73454	IJ	IJ	IJ	IJ	IJ	IJ	IJ	IJ	H	O	H	O	IJ	IJ	IJ	IJ	IJ	IJ	IJ	H	IJ	O	G	O	IJ	IJ	IJ	IJ	IJ	IJ	IJ	IJ	LT	IJ	H	IJ	I1	I1	I1	I1	I1	I1	I1	I1	H	I1	I1
NA11992	I1z	2.86657	IJ	IJ	IJ	IJ	IJ	IJ	IJ	H	H	G	IJ	N	IJ	IJ	IJ	IJ	IJ	IJ	IJ	IJ	IJ	H	O	C	IJ	IJ	IJ	IJ	IJ	IJ	IJ	IJ	IJ	O	IJ	R	I1	I1	I1	I1	I1	I1	I1	I1	I1	I1	I1
HG00101	I1a	2.61093	IJ	IJ	IJ	IJ	IJ	IJ	IJ	IJ	IJ	O	N	C	IJ	IJ	IJ	IJ	IJ	IJ	IJ	IJ	H	IJ	H	H	IJ	IJ	IJ	IJ	IJ	IJ	IJ	IJ	IJ	O	IJ	H	I1	I1	I1	I1	I1	I1	I1	I1	I1	I1	I1
HG00159	I1a	1.39429	IJ	IJ	IJ	IJ	IJ	IJ	IJ	IJ	IJ	IJ	N	O	IJ	IJ	IJ	IJ	IJ	IJ	IJ	IJ	IJ	H	IJ	G	IJ	IJ	IJ	IJ	IJ	IJ	IJ	IJ	IJ	IJ	G	IJ	I1	I1	I1	I1	I1	I1	I1	I1	I1	I1	I1
HG00234	I1a	2.54274	IJ	IJ	IJ	IJ	IJ	IJ	IJ	IJ	IJ	IJ	H	N	IJ												IJ	IJ	IJ	IJ	IJ	IJ	IJ	IJ	IJ	H	IJ	IJ	I1	I1	I1	I1	I1	I1	I1	I1	I1	I1	I1
HG00252	I1a	3.62892	IJ	IJ	IJ	IJ	IJ	IJ	IJ	IJ	IJ	O	O	H	IJ	IJ	IJ	IJ	IJ	IJ	IJ	IJ	IJ	H	IJ	H	IJ	IJ	IJ	IJ	IJ	IJ	IJ	IJ	IJ	H	IJ	H	I1	I1	I1	I1	I1	I1	I1	I1	I1	I1	H
HG02274	I1a	3.23435	IJ	IJ	IJ	IJ	IJ	IJ	IJ	IJ	H	IJ	H	H	IJ	IJ	IJ	IJ	IJ	IJ	IJ	IJ	IJ	IJ	IJ	IJ	IJ	IJ	IJ	IJ	IJ	IJ	IJ	IJ	IJ	H	IJ	IJ	I1	I1	I1	I1	I1	I1	I1	I1	I1	I1	I1
HG02420	I1a		IJ												IJ												IJ												I1
HG02433	I1a	1.89942	IJ	IJ	IJ	IJ	IJ	IJ	IJ	IJ	IJ	O	IJ	O	IJ	IJ	IJ	IJ	IJ	IJ	IJ	IJ	IJ	H	E	R	IJ	IJ	IJ	IJ	IJ	IJ	IJ	IJ	IJ	IJ	G	LT	I1	I1	I1	I1	I2	I2	I2	I1	H	O25	R2
HG02445	I1a	2.02052	IJ	IJ	IJ	IJ	IJ	IJ	IJ	IJ	H	H	O	H	IJ	IJ	IJ	IJ	IJ	IJ	IJ	IJ	IJ	O	R	H	IJ	IJ	IJ	IJ	IJ	IJ	IJ	IJ	IJ	IJ	H	H	I1	H	H	H	H	H	H	H	I1	I1	I1
NA06994	I1a	2.23167	IJ	IJ	IJ	IJ	IJ	IJ	IJ	IJ	IJ	O	AB	IJ	IJ	IJ	IJ	IJ	IJ	IJ	IJ	IJ	IJ	IJ	H	G	IJ	IJ	IJ	IJ	IJ	IJ	IJ	IJ	IJ	IJ	IJ	Q	I1	I1	I1	I1	I1	I1	I1	I1	I1	I1	I1
NA11881	I1a	3.18729	IJ	IJ	IJ	IJ	IJ	IJ	IJ	IJ	IJ	G	IJ	AB	IJ	IJ	IJ	IJ	IJ	IJ	IJ	IJ	H	IJ	IJ	G	IJ	IJ	IJ	IJ	IJ	IJ	IJ	IJ	IJ	IJ	O	H	I1	I1	I1	I1	I1	I1	I1	I1	I1	I1	G
NA12750	I1a	3.31438	IJ	IJ	IJ	IJ	IJ	IJ	IJ	IJ	IJ	O	O	O	IJ	IJ	IJ	IJ	IJ	IJ	IJ	IJ	IJ	IJ	IJ	H	IJ	IJ	IJ	IJ	IJ	IJ	IJ	IJ	IJ	H	H	N	I1	I1	I1	I1	I1	I1	I1	I1	I1	I1	I1
NA19982	I1a	3.2894	IJ	IJ	IJ	IJ	IJ	IJ	IJ	IJ	R	H	N	O	IJ	IJ	IJ	IJ	IJ	IJ	IJ	IJ	H	IJ	IJ	C	IJ	IJ	IJ	IJ	IJ	IJ	IJ	IJ	IJ	H	O	G	I1	I1	I1	I1	I1	I1	I1	I1	I1	I1	I1
NA20511	I1a	2.79516	IJ	IJ	IJ	IJ	IJ	IJ	IJ	IJ	IJ	H	H	R	IJ	IJ	IJ	IJ	IJ	IJ	IJ	IJ	IJ	O	H	H	IJ	IJ	IJ	IJ	IJ	IJ	IJ	IJ	IJ	IJ	H	H	I1	I1	I1	I1	I1	I1	I1	I1	I1	I1	I1
NA20762	I1a	2.43082	IJ	IJ	IJ	IJ	IJ	IJ	IJ	IJ	H	H	H	AB	IJ												IJ	IJ	IJ	IJ	IJ	IJ	IJ	IJ	IJ	IJ	H	E	I1	I1	I1	I1	I1	I1	I1	I1	I1	I1	I1
HG00190	I1d	1.33156	IJ	IJ	IJ	IJ	IJ	IJ	IJ	IJ	IJ	IJ	O	AB	IJ	IJ	IJ	IJ	IJ	IJ	IJ	IJ	IJ	IJ	IJ	IJ	IJ	IJ	IJ	IJ	IJ	IJ	IJ	IJ	IJ	H	IJ	C	I1	I1	I1	I1	I1	I1	I1	I1	I1	I1	I2
NA11829	I1d	4.3891	IJ	IJ	IJ	IJ	IJ	H	IJ	IJ	H	O	H	G	IJ												IJ	IJ	IJ	IJ	IJ	IJ	IJ	IJ	IJ	H	IJ	E	I1	I1	I1	I1	I1	I1	I1	I1	I1	I1	I1
NA19723	I1d	1.83196	IJ	IJ	IJ	IJ	IJ	IJ	IJ	O	IJ	H	N	O	IJ												IJ	IJ	IJ	IJ	IJ	IJ	IJ	IJ	IJ	IJ	H	H	I1	I1	I1	I1	I1	I1	I1	I1	I1	I1	I1
HG00189	I1d	1.51358	IJ	IJ	IJ	IJ	IJ	IJ	IJ	IJ	IJ	H	H	H	IJ												IJ	IJ	IJ	IJ	IJ	IJ	IJ	IJ	IJ	H	IJ	H	I1	I1	I1	I1	I1	I1	I1	I1	I1	I1	I1
HG00186	I1d	1.53995	IJ	IJ	IJ	IJ	IJ	IJ	IJ	H	IJ	O	N	C	IJ	IJ	IJ	IJ	IJ	IJ	IJ	IJ	IJ	H	IJ	O	IJ	IJ	IJ	IJ	IJ	IJ	IJ	IJ	IJ	IJ	IJ	IJ	I1	I1	I1	I1	I1	I1	I1	I1	I1	I1	I1
HG00308	I1d	1.09807	IJ	IJ	IJ	IJ	IJ	IJ	IJ	IJ	IJ	O	H	H	IJ												IJ	IJ	IJ	IJ	IJ	IJ	IJ	IJ	IJ	IJ	IJ	E	I1	I1	I1	I1	I1	I1	I1	I1	I1	I1	H
HG00321	I1d	1.97218	IJ	IJ	IJ	IJ	IJ	IJ	IJ	IJ	IJ	G	N	IJ	IJ	IJ	IJ	IJ	IJ	IJ	IJ	H	H	O	H	H	IJ	IJ	IJ	IJ	IJ	IJ	IJ	IJ	IJ	H	H	G	I1	I1	I1	I1	I1	I1	I1	I1	I1	I1	I1
HG00325	I1d	1.76552	IJ	IJ	IJ	IJ	IJ	IJ	IJ	IJ	IJ	H	H	N	IJ	IJ	IJ	IJ	IJ	IJ	IJ	IJ	IJ	O	IJ	H	IJ	IJ	IJ	IJ	IJ	IJ	IJ	IJ	IJ	H	O	G	I1	I1	I1	I1	I1	I1	I1	I1	I1	I1	I1
HG00345	I1d	3.92699	IJ	IJ	IJ	IJ	IJ	IJ	IJ	IJ	IJ	O	H	O	IJ	IJ	IJ	IJ	IJ	IJ	IJ	IJ	H	H	O	H	IJ	IJ	IJ	IJ	IJ	IJ	IJ	IJ	IJ	H	IJ	IJ	I1	I1	I1	I1	I1	I1	I1	I1	I1	I1	I1
HG00372	I1d	1.40118	IJ	IJ	IJ	IJ	IJ	IJ	IJ	IJ	H	IJ	H	O	IJ	IJ	IJ	IJ	IJ	IJ	IJ	IJ	H	IJ	IJ	IJ	IJ	IJ	IJ	IJ	IJ	IJ	IJ	IJ	IJ	IJ	IJ	R	I1	I1	I1	I1	I1	I1	I1	I1	I1	I1	I1
HG02536	I2a	2.19788	IJ	IJ	IJ	IJ	IJ	IJ	IJ	IJ	O	IJ	N	N	IJ	IJ	IJ	IJ	IJ	IJ	IJ	IJ	IJ	IJ	AB	LT	IJ	IJ	IJ	IJ	IJ	IJ	IJ	IJ	IJ	IJ	IJ	LT	I2	I2	I2	I2	I2	I2	I2	I2	I2	I2	J2
HG00360	I2a	2.98562	IJ	IJ	IJ	IJ	IJ	IJ	IJ	IJ	IJ	H	H	O	IJ												IJ	IJ	IJ	IJ	IJ	IJ	IJ	IJ	IJ	IJ	H	R	I2	I2	I2	I2	I2	I2	I2	I2	I2	H	O6
HG01167	I2b	6.85763	IJ	IJ	IJ	IJ	IJ	IJ	IJ	IJ	IJ	O	IJ	O	IJ	IJ	IJ	IJ	IJ	IJ	IJ	IJ	IJ	C	C	H	IJ	IJ	IJ	IJ	IJ	IJ	IJ	IJ	IJ	H	IJ	C	I2	I2	I2	I2	I2	I2	I2	I2	I2	O25	I1
HG01610	I2b	1.87885	IJ	IJ	IJ	IJ	IJ	IJ	IJ	O	O	N	IJ	O	IJ	IJ	IJ	IJ	IJ	IJ	IJ	IJ	IJ	IJ	O	H	IJ	IJ	IJ	IJ	IJ	IJ	IJ	IJ	IJ	IJ	O	C	I2	I2	I2	I2	I2	I2	I2	I2	I2	O6	O25
HG01344	I2b	2.64131	IJ	IJ	IJ	IJ	IJ	IJ	IJ	IJ	IJ	G	O	E	IJ												IJ	IJ	IJ	IJ	IJ	IJ	IJ	IJ	IJ	IJ	IJ	R	I2	I2	I2	I2	I2	I2	I2	I2	I2	I1	I1
HG01101	I2b	5.00396	IJ	IJ	IJ	IJ	IJ	IJ	IJ	IJ	IJ	IJ	IJ	IJ	IJ	IJ	IJ	IJ	IJ	IJ	IJ	IJ	IJ	IJ	O	H	IJ	IJ	IJ	IJ	IJ	IJ	IJ	IJ	H	IJ	O	E	I2	I2	I2	I2	I2	I2	I2	I2	H	I2	I1
HG01197	I2b	2.54588	IJ	IJ	IJ	IJ	IJ	IJ	IJ	IJ	O	IJ	G	R	IJ	IJ	IJ	IJ	IJ	IJ	IJ	IJ	IJ	IJ	IJ	O	IJ	IJ	IJ	IJ	IJ	IJ	IJ	IJ	IJ	IJ	G	H	I2	I2	I2	I2	I2	I2	I2	I2	I2	I1	O25
HG01527	I2d	2.96131	IJ	IJ	IJ	IJ	IJ	IJ	IJ	IJ	IJ	IJ	N	O	IJ												IJ	IJ	IJ	IJ	IJ	IJ	IJ	IJ	IJ	IJ	IJ	H	I2	I2	I2	I2	I2	I2	I2	I2	I2	I2	O6
NA12413	I2d		IJ												IJ												IJ												I2
HG00136	I2d	1.23566	IJ	IJ	IJ	IJ	IJ	IJ	IJ	IJ	O	H	IJ	AB	IJ	IJ	IJ	IJ	IJ	IJ	IJ	H	IJ	H	G	E	IJ	IJ	IJ	IJ	IJ	IJ	IJ	IJ	IJ	O	H	O	I2	I2	I2	I2	I2	I2	I2	I2	I2	H	R1b
NA12003	I2d	2.38497	IJ	IJ	IJ	IJ	IJ	IJ	IJ	IJ	IJ	N	IJ	E	IJ	IJ	IJ	IJ	IJ	IJ	IJ	IJ	IJ	IJ	H	R	IJ	IJ	IJ	IJ	IJ	IJ	IJ	IJ	IJ	O	G	C	I2	I2	I2	I2	I2	I2	I2	I2	I2	H	I2
NA12748	I2d	2.83794	IJ	IJ	IJ	IJ	IJ	IJ	IJ	IJ	IJ	IJ	H	AB	IJ	IJ	IJ	IJ	IJ	IJ	IJ	IJ	IJ	H	IJ	H	IJ	IJ	IJ	IJ	IJ	IJ	IJ	IJ	IJ	IJ	H	G	I2	I2	I2	I2	I2	I2	I2	I2	I2	G	O1
NA19984	I2d	4.00788	IJ	IJ	IJ	IJ	IJ	IJ	IJ	IJ	IJ	N	O	H	IJ	IJ	IJ	IJ	IJ	IJ	IJ	IJ	IJ	IJ	IJ	IJ	IJ	IJ	IJ	IJ	IJ	IJ	IJ	IJ	IJ	IJ	O	IJ	I2	I2	I2	I2	I2	I2	I2	I2	I2	O25	J2
NA20351	I2d	2.48397	IJ	IJ	IJ	IJ	IJ	IJ	IJ	IJ	H	O	H	O	IJ	IJ	IJ	IJ	IJ	IJ	IJ	IJ	IJ	O	IJ	IJ	IJ	IJ	IJ	IJ	IJ	IJ	IJ	IJ	IJ	G	O	IJ	I2	I2	I2	I2	I2	I2	I2	I2	I2	O25	R1b
HG02470	I2d	1.53244	IJ	IJ	IJ	IJ	IJ	IJ	IJ	IJ	IJ	O	H	O	IJ	IJ	IJ	IJ	IJ	IJ	IJ	IJ	IJ	IJ	R	IJ	IJ	IJ	IJ	IJ	IJ	IJ	IJ	IJ	IJ	H	IJ	IJ	I2	I2	I2	I2	I2	I2	I2	I2	I2	H	I2
NA11932	I2d	2.54153	IJ	IJ	IJ	IJ	IJ	IJ	IJ	IJ	IJ	IJ	O	IJ	IJ	IJ	IJ	IJ	IJ	IJ	IJ	IJ	IJ	IJ	IJ	N	IJ	IJ	IJ	IJ	IJ	IJ	IJ	IJ	IJ	O	IJ	IJ	I2	I2	I2	I2	I2	I2	I2	I2	I2	I2	O25
HG01988	I2e	1.88722	IJ	IJ	IJ	IJ	IJ	IJ	IJ	H	O	IJ	O	H	IJ	IJ	IJ	IJ	IJ	IJ	IJ	IJ	IJ	IJ	H	O	IJ	IJ	IJ	IJ	IJ	IJ	IJ	IJ	IJ	H	O	Q	I2	I2	I2	I2	I2	I2	I2	H	I2	H	I1
HG01253	J1	1.61202	IJ	IJ	IJ	IJ	IJ	IJ	IJ	IJ	O	IJ	O	LT	IJ	IJ	IJ	IJ	IJ	IJ	IJ	IJ	IJ	O	H	N	IJ	IJ	IJ	IJ	IJ	IJ	IJ	IJ	IJ	H	LT	G	J1	J1	J1	J1	J1	J1	J1	J1	J1	J1	LT
HG01256	J1	2.73889	IJ	IJ	IJ	IJ	IJ	IJ	IJ	IJ	LT	H	O	H	IJ	IJ	IJ	IJ	IJ	IJ	IJ	IJ	IJ	H	H	H	IJ	IJ	IJ	IJ	IJ	IJ	IJ	IJ	H	IJ	E	C	J1	J1	J1	J1	J1	J1	J1	J1	J2	J1	J1
HG03767	J1	1.99509	IJ	IJ	IJ	IJ	IJ	IJ	IJ	IJ	H	O	G	O	IJ	IJ	IJ	IJ	IJ	IJ	IJ	IJ	IJ	Q	O	E	IJ	IJ	IJ	IJ	IJ	IJ	IJ	IJ	IJ	H	IJ	E	J1	J1	J1	J1	J1	J1	J2	J2	J1	J2	H
HG01494	J1	1.67192	IJ	IJ	IJ	IJ	IJ	IJ	IJ	H	IJ	N	N	N	IJ	IJ	IJ	IJ	IJ	IJ	IJ	IJ	IJ	H	H	O	IJ	IJ	IJ	IJ	IJ	IJ	IJ	IJ	IJ	IJ	H	E	J1	J1	J1	J1	J1	J1	J1	J1	J2	J2	O25
HG00181	J1	3.22156	IJ	IJ	IJ	IJ	IJ	IJ	IJ	IJ	H	H	H	AB	IJ	IJ	IJ	IJ	IJ	IJ	IJ	IJ	IJ	O	H	H	IJ	IJ	IJ	IJ	IJ	IJ	IJ	IJ	IJ	H	H	N	J1	J1	J1	J1	J1	J1	J2	J1	J2	O6	J1
HG01069	J1	2.67192	IJ	IJ	IJ	IJ	IJ	IJ	IJ	IJ	H	H	H	H	IJ												IJ	IJ	IJ	IJ	IJ	IJ	IJ	IJ	IJ	H	H	R	J1	J1	J1	J1	J1	J1	J1	J1	J1	J1	H
HG01130	J1	3.04093	IJ	IJ	IJ	IJ	IJ	IJ	IJ	IJ	IJ	IJ	O	H	IJ	IJ	IJ	IJ	IJ	IJ	IJ	H	IJ	IJ	O	H	IJ	IJ	IJ	IJ	IJ	IJ	IJ	IJ	IJ	IJ	H	H	J1	J1	J1	J1	J1	J1	J1	J1	J1	J2	H
HG01431	J1	3.59174	IJ	IJ	IJ	IJ	IJ	IJ	IJ	H	IJ	IJ	H	O	IJ	IJ	IJ	IJ	IJ	IJ	IJ	IJ	IJ	IJ	IJ	O	IJ	IJ	IJ	IJ	IJ	IJ	IJ	IJ	IJ	H	H	IJ	J1	J1	J1	J1	J1	J1	J1	J1	J1	O25	J1
HG01437	J1	1.25176	IJ	IJ	IJ	IJ	IJ	IJ	IJ	IJ	H	O	R	O	IJ												IJ	IJ	IJ	IJ	IJ	IJ	IJ	IJ	IJ	H	H	G	J1	J2	J2	J2	J2	J2	J2	J2	J2	J2	J2
HG01571	J1	1.4174	IJ	IJ	IJ	IJ	IJ	IJ	IJ	IJ	IJ	O	O	O	IJ												IJ	IJ	IJ	IJ	IJ	IJ	IJ	IJ	IJ	H	O	H	J1	J1	J1	J1	J1	J1	J2	J1	J1	J1	J1
HG01686	J1	1.98518	IJ	IJ	IJ	IJ	IJ	IJ	IJ	IJ	H	O	O	H	IJ												IJ	IJ	IJ	IJ	IJ	IJ	IJ	IJ	H	O	H	H	J1	J1	J1	J1	J1	J1	J1	J2	J1	J2	H
HG01935	J1	3.13527	IJ	IJ	IJ	IJ	IJ	IJ	IJ	H	O	IJ	H	H	IJ												IJ	IJ	IJ	IJ	IJ	IJ	IJ	IJ	IJ	H	O	H	J1	J1	J1	J1	J1	J1	J1	J1	J2	J1	H
HG02253	J1	2.22262	IJ	IJ	IJ	IJ	IJ	IJ	IJ	IJ	H	IJ	C	N	IJ	IJ	IJ	IJ	IJ	IJ	IJ	IJ	IJ	IJ	O	C	IJ	IJ	IJ	IJ	IJ	IJ	IJ	IJ	IJ	H	O	IJ	J1	J1	J1	J1	J1	J1	J1	J1	J1	J1	J2
NA12282	J1	2.92573	IJ	IJ	IJ	IJ	IJ	IJ	IJ	IJ	H	IJ	H	O	IJ	IJ	IJ	IJ	IJ	IJ	IJ	IJ	H	H	H	H	IJ	IJ	IJ	IJ	IJ	IJ	IJ	IJ	H	IJ	H	R	J1	J1	J1	J1	J1	J1	J1	J1	J1	J1	J1
NA20543	J1	3.21573	IJ	IJ	IJ	IJ	IJ	IJ	IJ	IJ	IJ	O	O	O	IJ												IJ	IJ	IJ	IJ	IJ	IJ	IJ	IJ	IJ	H	R	H	J1	J1	J1	J1	J1	J1	J2	J1	J1	J1	O6
HG01589	J2	2.29955	IJ	IJ	IJ	IJ	IJ	IJ	IJ	IJ	IJ	IJ	N	O	IJ	IJ	IJ	IJ	IJ	IJ	IJ	IJ	IJ	LT	E	N	IJ	IJ	IJ	IJ	IJ	IJ	IJ	IJ	IJ	O	E	H	J2	J2	J2	J2	J2	J2	J2	J2	J2	J2	G
HG01164	J2a	2.51103	IJ	IJ	IJ	IJ	IJ	IJ	IJ	IJ	IJ	H	H	IJ	IJ												IJ	IJ	IJ	IJ	IJ	IJ	IJ	IJ	IJ	O	IJ	H	J2	J2	J2	J2	J2	J2	J2	J2	J2	J2	J1
HG01402	J2a	3.07443	IJ	IJ	IJ	IJ	IJ	IJ	IJ	IJ	O	IJ	G	G	IJ	IJ	IJ	IJ	IJ	IJ	IJ	IJ	IJ	O	O	IJ	IJ	IJ	IJ	IJ	IJ	IJ	IJ	IJ	IJ	H	H	O	J2	J2	J2	J2	J2	J2	J2	J2	J2	J2	J2
HG01412	J2a	3.32784	IJ	IJ	IJ	IJ	IJ	IJ	IJ	IJ	H	H	O	AB	IJ	IJ	IJ	IJ	IJ	IJ	IJ	IJ	IJ	H	IJ	Q	IJ	IJ	IJ	IJ	IJ	IJ	IJ	IJ	IJ	H	H	H	J2	J2	J2	J2	J2	J2	J2	J2	J2	J2	H
HG01672	J2a	1.38777	IJ	IJ	IJ	IJ	IJ	IJ	IJ	IJ	H	O	N	O	IJ												IJ	IJ	IJ	IJ	IJ	IJ	IJ	IJ	IJ	IJ	H	IJ	J2	J2	J2	J2	J2	J2	J2	J2	J2	J2	J2
HG01756	J2a	5.30201	IJ	IJ	IJ	IJ	IJ	IJ	IJ	H	H	IJ	N	H	IJ	IJ	IJ	IJ	IJ	IJ	IJ	IJ	IJ	H	H	E	IJ	IJ	IJ	IJ	IJ	IJ	IJ	IJ	IJ	IJ	IJ	N	J2	J2	J2	J2	J2	J2	J2	J2	J2	J2	E1
HG01781	J2a	3.60406	IJ	IJ	IJ	IJ	IJ	IJ	IJ	IJ	IJ	H	O	AB	IJ	IJ	IJ	IJ	IJ	IJ	IJ	IJ	IJ	H	O	C	IJ	IJ	IJ	IJ	IJ	IJ	IJ	IJ	IJ	IJ	IJ	Q	J2	J2	J2	J2	J2	J2	J2	J2	J2	J2	O25
HG01991	J2a	5.59741	IJ	IJ	IJ	IJ	IJ	IJ	IJ	IJ	H	IJ	R	O	IJ	IJ	IJ	IJ	IJ	IJ	IJ	IJ	IJ	H	G	IJ	IJ	IJ	IJ	IJ	IJ	IJ	IJ	IJ	IJ	IJ	C	H	J2	J2	J2	J2	J2	J2	J2	J2	J2	J2	I1
HG02490	J2a	4.1703	IJ	IJ	IJ	IJ	IJ	IJ	IJ	IJ	IJ	G	G	H	IJ	IJ	IJ	IJ	IJ	IJ	IJ	IJ	H	O	LT	H	IJ	IJ	IJ	IJ	IJ	IJ	IJ	IJ	IJ	Q	R	G	J2	J2	J2	J2	J2	J2	J2	J2	J2	I1	J2
HG02651	J2a	2.92241	IJ	IJ	IJ	IJ	IJ	IJ	IJ	IJ	IJ	O	IJ	H	IJ	IJ	IJ	IJ	IJ	IJ	IJ	H	IJ	H	G	H	IJ	IJ	IJ	IJ	IJ	IJ	IJ	IJ	IJ	O	H	IJ	J2	J2	J2	J2	J2	J2	J2	J2	J2	J2	O6
HG02774	J2a	2.9079	IJ	IJ	IJ	IJ	IJ	IJ	IJ	IJ	IJ	IJ	N	G	IJ												IJ	IJ	IJ	IJ	IJ	IJ	IJ	IJ	IJ	IJ	H	H	J2	J2	J2	J2	J2	J2	J2	J2	J2	J2	O6
HG03237	J2a	2.99558	IJ	IJ	IJ	IJ	IJ	IJ	IJ	IJ	H	H	LT	N	IJ												IJ	IJ	IJ	IJ	IJ	IJ	IJ	IJ	IJ	IJ	IJ	IJ	J2	J2	J2	J2	J2	J2	J2	J2	J2	J2	J2
HG03615	J2a	2.78951	IJ	IJ	IJ	IJ	IJ	IJ	IJ	H	H	O	O	H	IJ	IJ	IJ	IJ	IJ	IJ	IJ	IJ	H	H	H	C	IJ	IJ	IJ	IJ	IJ	IJ	IJ	IJ	IJ	H	H	LT	J2	J2	J2	J2	J2	J2	J2	J2	J2	J2	J2
HG03693	J2a	4.01715	IJ	IJ	IJ	IJ	IJ	IJ	IJ	IJ	O	O	IJ	O	IJ	IJ	IJ	IJ	IJ	IJ	IJ	IJ	H	IJ	O	E	IJ	IJ	IJ	IJ	IJ	IJ	IJ	IJ	IJ	IJ	IJ	R	J2	J2	J2	J2	J2	J2	J2	J2	J2	J2	J2
HG03851	J2a	2.10226	IJ	IJ	IJ	IJ	IJ	IJ	IJ	IJ	IJ	O	IJ	O	IJ												IJ	IJ	IJ	IJ	IJ	IJ	IJ	IJ	IJ	IJ	H	C	J2	J2	J2	J2	J2	J2	J2	J2	J2	J2	H
HG03854	J2a	2.65735	IJ	IJ	IJ	IJ	IJ	IJ	IJ	IJ	IJ	O	O	IJ	IJ	IJ	IJ	IJ	IJ	IJ	IJ	IJ	IJ	IJ	O	H	IJ	IJ	IJ	IJ	IJ	IJ	IJ	IJ	IJ	IJ	H	O	J2	J2	J2	J2	J2	J2	J2	J2	J2	J2	J2
HG03905	J2a	1.91585	IJ	IJ	IJ	IJ	IJ	IJ	IJ	IJ	H	H	H	H	IJ	IJ	IJ	IJ	IJ	IJ	IJ	IJ	H	IJ	LT	C	IJ	IJ	IJ	IJ	IJ	IJ	IJ	IJ	IJ	H	H	G	J2	J2	J2	J2	J2	J2	J2	J2	J2	J2	J2
HG04003	J2a	3.58868	IJ	IJ	IJ	IJ	IJ	IJ	IJ	H	O	IJ	IJ	C	IJ	IJ	IJ	IJ	IJ	IJ	IJ	IJ	H	H	H	G	IJ	IJ	IJ	IJ	IJ	IJ	IJ	IJ	IJ	H	IJ	LT	J2	J2	J2	J2	J2	J2	J2	J2	J2	J2	H
HG04107	J2a	2.20283	IJ	IJ	IJ	IJ	IJ	IJ	IJ	O	H	O	H	N	IJ	IJ	IJ	IJ	IJ	IJ	IJ	IJ	IJ	IJ	IJ	C	IJ	IJ	IJ	IJ	IJ	IJ	IJ	IJ	LT	IJ	G	IJ	J2	J2	J2	J2	J2	J2	J2	J2	J2	O25	I1
NA20513	J2a	2.19919	IJ	IJ	IJ	IJ	IJ	IJ	IJ	IJ	H	O	IJ	N	IJ	IJ	IJ	IJ	IJ	IJ	IJ	IJ	IJ	H	G	G	IJ	IJ	IJ	IJ	IJ	IJ	IJ	IJ	IJ	IJ	H	O	J2	J2	J2	J2	J2	J2	J2	J2	J2	J2	J2
NA20521	J2a	2.2577	IJ	IJ	IJ	IJ	IJ	IJ	IJ	IJ	O	G	IJ	N	IJ	IJ	IJ	IJ	IJ	IJ	IJ	IJ	IJ	G	H	O	IJ	IJ	IJ	IJ	IJ	IJ	IJ	IJ	IJ	H	C	H	J2	J2	J2	J2	J2	J2	J2	J2	J2	J2	J2
NA20534	J2a	2.91558	IJ	IJ	IJ	IJ	IJ	IJ	IJ	IJ	IJ	O	O	H	IJ	IJ	IJ	IJ	IJ	IJ	IJ	H	IJ	O	H	AB	IJ	IJ	IJ	IJ	IJ	IJ	IJ	IJ	IJ	H	O	IJ	J2	J2	J2	J2	J2	J2	J2	J2	J2	J2	J2
NA20765	J2a	2.60898	IJ	IJ	IJ	IJ	IJ	IJ	IJ	O	IJ	O	IJ	N	IJ	IJ	IJ	IJ	IJ	IJ	IJ	IJ	IJ	IJ	AB	H	IJ	IJ	IJ	IJ	IJ	IJ	IJ	IJ	IJ	IJ	H	E	J2	J2	J2	J2	J2	J2	J2	J2	J2	J2	J1
NA20778	J2a	3.15552	IJ	IJ	IJ	IJ	IJ	IJ	IJ	H	H	N	H	E	IJ	IJ	IJ	IJ	IJ	IJ	IJ	IJ	IJ	IJ	IJ	E	IJ	IJ	IJ	IJ	IJ	IJ	IJ	IJ	IJ	IJ	O	G	J2	J2	J2	J2	J2	J2	J2	J2	J2	J2	O25
NA20787	J2a	2.90124	IJ	IJ	IJ	IJ	IJ	IJ	IJ	IJ	IJ	H	IJ	AB	IJ												IJ	IJ	IJ	IJ	IJ	IJ	IJ	IJ	IJ	IJ	O	IJ	J2	J2	J2	J2	J2	J2	J2	J2	J2	J2	O25
NA20801	J2a	2.77573	IJ	IJ	IJ	IJ	IJ	IJ	IJ	IJ	IJ	G	IJ	R	IJ	IJ	IJ	IJ	IJ	IJ	IJ	IJ	IJ	LT	H	O	IJ	IJ	IJ	IJ	IJ	IJ	IJ	IJ	IJ	IJ	H	LT	J2	J2	J2	J2	J2	J2	J2	J2	J2	J2	J2
NA20805	J2a	2.67034	IJ	IJ	IJ	IJ	IJ	IJ	IJ	IJ	H	N	IJ	H	IJ	IJ	IJ	IJ	IJ	IJ	IJ	IJ	IJ	H	IJ	H	IJ	IJ	IJ	IJ	IJ	IJ	IJ	IJ	IJ	H	IJ	C	J2	J2	J2	J2	J2	J2	J2	J2	J2	J2	J1
NA20809	J2a	3.13171	IJ	IJ	IJ	IJ	IJ	IJ	IJ	IJ	H	IJ	N	R	IJ	IJ	IJ	IJ	IJ	IJ	IJ	IJ	H	IJ	O	H	IJ	IJ	IJ	IJ	IJ	IJ	IJ	IJ	IJ	O	H	H	J2	J2	J2	J2	J2	J2	J2	J2	J2	I2	I1
NA20815	J2a	2.07152	IJ	IJ	IJ	IJ	IJ	IJ	IJ	IJ	IJ	H	H	C	IJ	IJ	IJ	IJ	IJ	IJ	IJ	IJ	IJ	H	O	H	IJ	IJ	IJ	IJ	IJ	IJ	IJ	IJ	IJ	O	O	R	J2	J2	J2	J2	J2	J2	J2	J2	J2	J2	J2
NA20827	J2a	2.04395	IJ	IJ	IJ	IJ	IJ	IJ	IJ	IJ	H	N	N	H	IJ	IJ	IJ	IJ	IJ	IJ	IJ	IJ	IJ	IJ	IJ	AB	IJ	IJ	IJ	IJ	IJ	IJ	IJ	IJ	IJ	O	O	H	J2	J2	J2	J2	J2	J2	J2	J2	J2	J2	J2
NA21090	J2a	2.02033	IJ	IJ	IJ	IJ	IJ	IJ	IJ	IJ	IJ	H	O	O	IJ	IJ	IJ	IJ	IJ	IJ	IJ	H	IJ	H	IJ	IJ	IJ	IJ	IJ	IJ	IJ	IJ	IJ	IJ	IJ	IJ	IJ	G	J2	J2	J2	J2	J2	J2	J2	J2	J2	J2	J2
NA21130	J2a	2.69381	IJ	IJ	IJ	IJ	IJ	IJ	IJ	IJ	H	IJ	O	IJ	IJ	IJ	IJ	IJ	IJ	IJ	IJ	IJ	IJ	IJ	O	H	IJ	IJ	IJ	IJ	IJ	IJ	IJ	IJ	IJ	IJ	H	H	J2	J2	J2	J2	J2	J2	J2	J2	J2	O25	J2
HG02236	J2a	1.84023	IJ	IJ	IJ	IJ	IJ	IJ	IJ	IJ	IJ	IJ	O	H	IJ												IJ	IJ	IJ	IJ	IJ	IJ	IJ	IJ	IJ	O	O	N	J2	J2	J2	J2	J2	J2	J2	J2	J2	J2	J2
HG02724	J2a	3.75873	IJ	IJ	IJ	IJ	IJ	IJ	IJ	IJ	IJ	IJ	H	O	IJ	IJ	IJ	IJ	IJ	IJ	IJ	IJ	IJ	IJ	H	O	IJ	IJ	IJ	IJ	IJ	IJ	IJ	IJ	IJ	IJ	H	LT	J2	J2	J2	J2	J2	J2	J2	J2	J2	J2	O6
HG03018	J2a	2.24254	IJ	IJ	IJ	IJ	IJ	IJ	IJ	IJ	N	O	H	G	IJ	IJ	IJ	IJ	IJ	IJ	IJ	IJ	H	IJ	IJ	Q	IJ	IJ	IJ	IJ	IJ	IJ	IJ	IJ	IJ	O	IJ	IJ	J2	J2	J2	J2	J2	J2	J2	J2	J2	J2	J1
HG02493	J2a	3.45046	IJ	IJ	IJ	IJ	IJ	IJ	IJ	IJ	IJ	O	G	N	IJ												IJ	IJ	IJ	IJ	IJ	IJ	IJ	IJ	IJ	O	IJ	O	J2	J2	J2	J2	J2	J2	J2	J2	J2	J2	J2
HG02733	J2a	4.20247	IJ	IJ	IJ	IJ	IJ	IJ	IJ	IJ	O	O	O	O	IJ	IJ	IJ	IJ	IJ	IJ	IJ	IJ	IJ	IJ	IJ	IJ	IJ	IJ	IJ	IJ	IJ	IJ	IJ	IJ	IJ	IJ	R	IJ	J2	J2	J2	J2	J2	J2	J2	J2	J2	J2	R1b
HG03012	J2a	2.07847	IJ	IJ	IJ	IJ	IJ	IJ	IJ	H	IJ	H	O	N	IJ	IJ	IJ	IJ	IJ	IJ	IJ	H	IJ	H	O	O	IJ	IJ	IJ	IJ	IJ	IJ	IJ	IJ	IJ	H	IJ	N	J2	J2	J2	J2	J2	J2	J2	J2	J2	H	J2
HG03021	J2a	1.99828	IJ	IJ	IJ	IJ	IJ	IJ	IJ	IJ	H	H	O	H	IJ												IJ	IJ	IJ	IJ	IJ	IJ	IJ	IJ	IJ	O	O	IJ	J2	J2	J2	J2	J2	J2	J2	J2	J2	J2	J2
HG03660	J2a	2.86504	IJ	IJ	IJ	IJ	IJ	IJ	IJ	IJ	H	IJ	H	IJ	IJ	IJ	IJ	IJ	IJ	IJ	IJ	IJ	IJ	H	O	IJ	IJ	IJ	IJ	IJ	IJ	IJ	IJ	IJ	IJ	IJ	H	Q	J2	J2	J2	J2	J2	J2	J2	J2	J2	J2	J2
NA20884	J2a	1.44172	IJ	IJ	IJ	IJ	IJ	IJ	IJ	IJ	IJ	H	O	H	IJ	IJ	IJ	IJ	IJ	IJ	IJ	IJ	H	H	G	C	IJ	IJ	IJ	IJ	IJ	IJ	IJ	IJ	IJ	H	IJ	R	J2	J2	J2	J2	J2	J2	J2	J2	J2	J2	J2
NA20588	J2b	3.65974	IJ	IJ	IJ	IJ	IJ	IJ	IJ	IJ	IJ	O	H	H	IJ	IJ	IJ	IJ	IJ	IJ	IJ	IJ	IJ	IJ	H	O	IJ	IJ	IJ	IJ	IJ	IJ	IJ	IJ	IJ	H	IJ	H	J2	J2	J2	J2	J2	J2	J2	J2	J2	J2	H
HG01619	J2b	2.75744	IJ	IJ	IJ	IJ	IJ	IJ	IJ	IJ	IJ	H	H	O	IJ	IJ	IJ	IJ	IJ	IJ	IJ	IJ	IJ	O	H	H	IJ	IJ	IJ	IJ	IJ	IJ	IJ	IJ	IJ	H	H	G	J2	J2	J2	J2	J2	J2	J2	J2	J2	J2	J1
HG00160	J2b	2.50855	IJ	IJ	IJ	IJ	IJ	IJ	IJ	IJ	IJ	H	IJ	O	IJ	IJ	IJ	IJ	IJ	IJ	IJ	IJ	IJ	H	O	AB	IJ	IJ	IJ	IJ	IJ	IJ	IJ	IJ	IJ	O	N	O	J2	J2	J2	J2	J2	J2	J2	J2	J2	J2	I1
HG01509	J2b	2.00547	IJ	IJ	IJ	IJ	IJ	IJ	IJ	IJ	O	H	H	G	IJ	IJ	IJ	IJ	IJ	IJ	IJ	IJ	IJ	O	E	IJ	IJ	IJ	IJ	IJ	IJ	IJ	IJ	IJ	IJ	H	H	H	J2	J2	J2	J2	J2	J2	J2	J2	J2	J2	O6
NA11930	J2b	3.09293	IJ	IJ	IJ	IJ	IJ	IJ	IJ	H	O	O	IJ	G	IJ	IJ	IJ	IJ	IJ	IJ	IJ	H	IJ	H	H	N	IJ	IJ	IJ	IJ	IJ	IJ	IJ	O	IJ	H	IJ	G	J2	J2	J2	J2	J2	J2	H	J2	J2	J2	G
NA20525	J2b	2.79885	IJ	IJ	IJ	IJ	IJ	IJ	IJ	IJ	IJ	Q	H	R	IJ	IJ	IJ	IJ	IJ	IJ	IJ	IJ	IJ	H	H	C	IJ	IJ	IJ	IJ	IJ	IJ	IJ	IJ	IJ	H	H	G	J2	J2	J2	J2	J2	J2	J2	J2	J2	J2	J2
NA20763	J2b	2.68435	IJ	IJ	IJ	IJ	IJ	IJ	IJ	O	H	O	H	O	IJ	IJ	IJ	IJ	IJ	IJ	IJ	IJ	IJ	N	O	Q	IJ	IJ	IJ	IJ	IJ	IJ	IJ	IJ	IJ	IJ	O	N	J2	J2	J2	J2	J2	J2	J2	J2	J2	J2	R2
NA20811	J2b	2.03497	IJ	IJ	IJ	IJ	IJ	IJ	IJ	IJ	O	IJ	N	O	IJ	IJ	IJ	IJ	IJ	IJ	IJ	IJ	IJ	LT	IJ	Q	IJ	IJ	IJ	IJ	IJ	IJ	IJ	IJ	IJ	IJ	IJ	R	J2	J2	J2	J2	J2	J2	J2	J2	H	J2	O25
HG02690	J2b	2.99226	IJ	IJ	IJ	IJ	IJ	IJ	IJ	IJ	H	H	O	O	IJ	IJ	IJ	IJ	IJ	IJ	IJ	IJ	H	O	H	H	IJ	IJ	IJ	IJ	IJ	IJ	IJ	IJ	IJ	IJ	H	O	J2	J2	J2	J2	J2	J2	J2	J2	J2	J2	R2
HG03006	J2b	2.6713	IJ	IJ	IJ	IJ	IJ	IJ	IJ	IJ	H	G	O	O	IJ	IJ	IJ	IJ	IJ	IJ	IJ	IJ	IJ	O	H	H	IJ	IJ	IJ	IJ	IJ	IJ	IJ	IJ	IJ	H	O	G	J2	J2	J2	J2	J2	J2	J2	J2	J2	J2	J2
HG03696	J2b	2.50999	IJ	IJ	IJ	IJ	IJ	IJ	IJ	IJ	IJ	G	N	H	IJ												IJ	IJ	IJ	IJ	IJ	IJ	IJ	IJ	IJ	IJ	H	IJ	J2	J2	J2	J2	J2	J2	J2	J2	J2	J2	O6
HG03785	J2b	2.32034	IJ	IJ	IJ	IJ	IJ	IJ	IJ	IJ	IJ	O	IJ	O	IJ	IJ	IJ	IJ	IJ	IJ	IJ	IJ	IJ	O	O	R	IJ	IJ	IJ	IJ	IJ	IJ	IJ	IJ	IJ	H	O	C	J2	J2	J2	J2	J2	J2	J2	J2	J2	J2	H
HG03908	J2b	3.08703	IJ	IJ	IJ	IJ	IJ	IJ	IJ	IJ	IJ	IJ	O	O	IJ	IJ	IJ	IJ	IJ	IJ	IJ	IJ	IJ	IJ	H	R	IJ	IJ	IJ	IJ	IJ	IJ	IJ	IJ	IJ	O	O	AB	J2	J2	J2	J2	J2	J2	J2	J2	J2	J2	J2
HG03969	J2b	2.12011	IJ	IJ	IJ	IJ	IJ	IJ	IJ	IJ	IJ	O	E	O	IJ	IJ	IJ	IJ	IJ	IJ	IJ	IJ	IJ	H	Q	O	IJ	IJ	IJ	IJ	IJ	IJ	IJ	IJ	IJ	IJ	IJ	IJ	J2	J2	J2	J2	J2	J2	J2	J2	J2	H	J2
HG03976	J2b	1.71866	IJ	IJ	IJ	IJ	IJ	IJ	IJ	H	IJ	IJ	O	H	IJ	IJ	IJ	IJ	IJ	IJ	IJ	IJ	IJ	O	O	G	IJ	IJ	IJ	IJ	IJ	IJ	IJ	IJ	IJ	IJ	IJ	C	J2	J2	J2	J2	J2	J2	J2	J2	J2	H	J1
HG03998	J2b	1.52112	IJ	IJ	IJ	IJ	IJ	IJ	IJ	IJ	IJ	O	IJ	H	IJ	IJ	IJ	IJ	IJ	IJ	IJ	IJ	IJ	O	LT	H	IJ	IJ	IJ	IJ	IJ	IJ	IJ	IJ	IJ	H	H	O	J2	J2	J2	J2	J2	J2	J2	J2	J2	J2	J2
HG04210	J2b	3.65621	IJ	IJ	IJ	IJ	IJ	IJ	IJ	IJ	IJ	O	H	N	IJ	IJ	IJ	IJ	IJ	IJ	IJ	IJ	H	O	R	IJ	IJ	IJ	IJ	IJ	IJ	IJ	IJ	IJ	IJ	H	IJ	O	J2	J2	J2	J2	J2	J2	J2	J2	J2	J2	J2
HG04239	J2b	3.12194	IJ	IJ	IJ	IJ	IJ	IJ	IJ	IJ	IJ	IJ	O	G	IJ	IJ	IJ	IJ	IJ	IJ	IJ	IJ	IJ	O	O	LT	IJ	IJ	IJ	IJ	IJ	IJ	IJ	IJ	IJ	H	IJ	Q	J2	J2	J2	J2	J2	J2	J2	J2	J2	J2	LT
NA20885	J2b	2.86835	IJ	IJ	IJ	IJ	IJ	IJ	IJ	H	IJ	O	IJ	H	IJ												IJ	IJ	IJ	IJ	IJ	IJ	IJ	IJ	IJ	H	R	O	J2	J2	J2	J2	J2	J2	J2	J2	J2	LT	J2
NA20905	J2b	2.24282	IJ	IJ	IJ	IJ	IJ	IJ	IJ	IJ	IJ	IJ	H	Q	IJ	IJ	IJ	IJ	IJ	IJ	IJ	IJ	LT	H	G	H	IJ	IJ	IJ	IJ	IJ	IJ	IJ	IJ	IJ	IJ	O	C	J2	J2	J2	J2	J2	J2	J2	J2	J2	J2	H
HG03742	K2	2.38523	NA												NA												NA												NA
HG02792	L1a	3.0294	LT	LT	LT	LT	IJ	IJ	IJ	O	LT	N	O	C	LT	LT	LT	LT	LT	LT	LT	LT	LT	O	LT	Q	LT	LT	LT	LT	LT	LT	LT	LT	LT	H	LT	G	LT	LT	LT	LT	LT	LT	LT	LT	LT	LT	J1
HG03790	L1a	2.4993	LT	LT	LT	IJ	IJ	LT	LT	O	H	O	H	E	LT	LT	LT	LT	LT	LT	LT	LT	LT	LT	LT	LT	LT	LT	LT	LT	LT	LT	LT	LT	LT	O	R	E	LT	LT	LT	LT	LT	LT	LT	LT	LT	O25	O1
HG03786	L1a	4.12333	LT	LT	IJ	IJ	IJ	IJ	IJ	O	LT	O	G	IJ	LT	LT	LT	LT	LT	LT	LT	LT	LT	O	O	H	LT	LT	LT	LT	LT	LT	LT	LT	LT	O	C	E	LT	LT	LT	LT	LT	LT	LT	LT	LT	G	C
HG03885	L1a	3.33997	LT	IJ	IJ	IJ	IJ	IJ	IJ	IJ	IJ	O	O	O	LT	LT	LT	LT	LT	LT	LT	LT	LT	G	O	O	LT	LT	LT	LT	LT	LT	LT	LT	LT	H	O	R	LT	LT	LT	LT	LT	LT	LT	LT	LT	H	O6
HG02654	L1a	3.86358	LT	LT	LT	IJ	IJ	LT	LT	O	O	O	G	IJ	LT	LT	LT	LT	LT	LT	LT	LT	LT	H	O	N	LT	LT	LT	LT	LT	LT	LT	LT	LT	LT	Q	AB	LT	LT	LT	LT	LT	LT	LT	H	LT	H	G
HG03686	L1a	2.30881	LT	LT	LT	LT	IJ	IJ	LT	O	IJ	O	O	N	LT												LT	LT	LT	LT	LT	LT	LT	LT	LT	H	O	H	LT	LT	LT	LT	LT	LT	LT	LT	LT	LT	I2
HG03875	L1a	2.73582	LT	LT	LT	IJ	LT	IJ	IJ	O	O	H	H	G	LT	LT	LT	LT	LT	LT	LT	LT	LT	R	O	C	LT	LT	LT	LT	LT	LT	LT	LT	LT	LT	O	O	LT	LT	LT	LT	LT	LT	LT	LT	LT	O25	O25
HG03920	L1a	2.4239	LT	LT	LT	IJ	IJ	IJ	LT	IJ	LT	O	O	O	LT	LT	LT	LT	LT	LT	LT	LT	LT	LT	R	R	LT	LT	LT	LT	LT	LT	LT	LT	LT	O	C	LT	LT	LT	LT	LT	LT	LT	LT	LT	LT	O6	O6
HG03953	L1a	2.14537	LT	LT	IJ	IJ	IJ	IJ	IJ	IJ	O	O	O	O	LT	LT	LT	LT	LT	LT	LT	LT	H	H	H	O	LT	LT	LT	LT	LT	LT	LT	LT	LT	LT	O	E	LT	LT	LT	LT	LT	LT	LT	LT	LT	LT	O25
HG03971	L1a	2.23696	LT	LT	LT	IJ	IJ	IJ	IJ	IJ	O	O	H	N	LT	LT	LT	LT	LT	LT	LT	LT	LT	O	O	LT	LT	LT	LT	LT	LT	LT	LT	LT	LT	LT	H	G	LT	LT	LT	LT	LT	LT	LT	LT	LT	LT	O25
HG03990	L1a	1.9823	LT	LT	LT	IJ	LT	LT	IJ	H	O	O	O	H	LT												LT	LT	LT	LT	LT	LT	LT	LT	LT	LT	O	IJ	LT	LT	LT	LT	LT	LT	LT	LT	LT	G	H
HG04080	L1a	2.08569	LT	LT	LT	LT	IJ	IJ	LT	O	R	O	O	G	LT	LT	LT	LT	LT	LT	LT	LT	LT	O	H	LT	LT	LT	LT	LT	LT	LT	LT	LT	LT	LT	O	IJ	LT	LT	LT	LT	LT	LT	LT	LT	LT	O6	G
HG04093	L1a	2.25293	LT	LT	LT	IJ	IJ	IJ	IJ	O	O	O	G	O	LT	LT	LT	LT	LT	LT	LT	LT	LT	LT	O	AB	LT	LT	LT	LT	LT	LT	LT	LT	LT	O	LT	G	LT	LT	LT	LT	LT	LT	LT	LT	LT	LT	LT
HG04100	L1a	3.33911	LT	LT	IJ	IJ	IJ	IJ	IJ	IJ	O	O	Q	H	LT	LT	LT	LT	LT	LT	LT	LT	LT	H	O	H	LT	LT	LT	LT	LT	LT	LT	LT	LT	R	H	O	LT	LT	LT	LT	LT	LT	LT	LT	LT	H	R1b
NA20861	L1a	1.76422	LT	LT	LT	IJ	LT	IJ	IJ	LT	O	O	H	O	LT	LT	LT	LT	LT	LT	LT	LT	H	LT	O	N	LT	LT	LT	LT	LT	LT	LT	LT	LT	LT	O	O	LT	LT	LT	LT	LT	LT	LT	LT	LT	LT	H
NA21109	L1a	2.1297	LT	LT	LT	LT	LT	IJ	IJ	O	O	O	G	O	LT												LT	LT	LT	LT	LT	LT	LT	LT	LT	LT	LT	E	LT	LT	LT	LT	LT	LT	LT	LT	LT	LT	O6
NA21128	L1a	2.63062	LT	LT	IJ	IJ	IJ	IJ	IJ	O	O	H	O	O	LT	LT	LT	LT	LT	LT	LT	LT	LT	LT	R	G	LT	LT	LT	LT	LT	LT	LT	LT	H	O	LT	H	LT	LT	LT	LT	LT	LT	LT	LT	LT	O3	O25
NA21135	L1a	3.27693	LT	LT	LT	LT	LT	LT	LT	O	O	O	O	O	LT	LT	LT	LT	LT	LT	LT	LT	H	R	H	C	LT	LT	LT	LT	LT	LT	LT	LT	LT	R	LT	N	LT	LT	LT	LT	LT	LT	LT	LT	LT	LT	I2
HG03746	L1a	5.04111	LT	LT	LT	IJ	IJ	LT	IJ	O	H	G	O	H	LT	LT	LT	LT	LT	LT	LT	LT	LT	H	G	G	LT	LT	LT	LT	LT	LT	LT	LT	LT	LT	G	Q	LT	LT	LT	LT	LT	LT	LT	LT	H	J1	H
HG03788	L1a	4.78185	LT	LT	IJ	IJ	IJ	IJ	IJ	IJ	H	O	G	O	LT	LT	LT	LT	LT	LT	LT	LT	LT	H	R	H	LT	LT	LT	LT	LT	LT	LT	LT	LT	LT	O	H	LT	LT	LT	LT	LT	LT	LT	LT	LT	LT	LT
NA20867	L1a	2.25434	LT	LT	LT	LT	LT	IJ	LT	IJ	O	O	O	O	LT	LT	LT	LT	LT	LT	LT	LT	LT	O	LT	LT	LT	LT	LT	LT	LT	LT	LT	LT	LT	LT	LT	LT	LT	LT	LT	LT	LT	LT	LT	LT	LT	LT	H
HG03672	L1a	2.36102	LT	LT	LT	LT	LT	LT	LT	O	O	O	O	H	LT	LT	LT	LT	LT	LT	LT	LT	LT	LT	O	AB	LT	LT	LT	LT	LT	LT	LT	LT	LT	LT	G	O	LT	LT	LT	LT	LT	LT	LT	LT	H	H	LT
HG03695	L1a	2.42037	LT	LT	LT	IJ	LT	IJ	LT	IJ	IJ	H	O	H	LT	LT	LT	LT	LT	LT	LT	LT	LT	LT	O	LT	LT	LT	LT	LT	LT	LT	LT	LT	LT	H	LT	O	LT	LT	LT	LT	LT	LT	LT	LT	LT	H	LT
HG03753	L1a	2.9414	LT	LT	LT	LT	LT	LT	LT	H	H	O	H	H	LT												LT	LT	LT	LT	LT	LT	LT	LT	LT	H	H	LT	LT	LT	LT	LT	LT	LT	LT	LT	LT	H	O25
HG03821	L1a	1.88967	LT	LT	LT	IJ	LT	LT	LT	O	LT	O	O	H	LT												LT	LT	LT	LT	LT	LT	LT	LT	LT	H	H	H	LT	LT	LT	LT	LT	LT	LT	LT	LT	LT	O25
HG03900	L1a	4.10828	LT	LT	LT	LT	LT	LT	IJ	IJ	H	H	O	N	LT	LT	LT	LT	LT	LT	LT	H	LT	LT	G	G	LT	LT	LT	LT	LT	LT	LT	LT	H	O	G	R	LT	LT	LT	LT	LT	LT	LT	LT	LT	LT	O25
HG04094	L1a	2.037	LT	LT	IJ	IJ	IJ	IJ	IJ	LT	O	O	N	O	LT	LT	LT	LT	LT	LT	LT	LT	LT	O	LT	G	LT	LT	LT	LT	LT	LT	LT	LT	LT	LT	R	H	LT	LT	LT	LT	LT	LT	LT	LT	LT	O25	O6
HG02026	N1	6.11277	N	IJ	IJ	N	IJ	N	N	N	IJ	N	H	O	N	N	N	N	N	N	N	N	N	H	G	O	N	N	N	N	N	N	N	N	N	O	N	IJ	NA
NA18613	N1	1.15545	N	IJ	IJ	IJ	IJ	IJ	IJ	O	O	N	O	N	N	N	N	N	N	N	N	N	N	O	G	N	N	N	N	N	N	N	N	N	N	N	N	N	NA
HG00351	N3a3	1.71934	N	IJ	IJ	N	IJ	N	N	N	O	N	N	E	N	N	N	N	N	N	N	N	N	N	H	N	N	N	N	N	N	N	N	N	N	N	O	O	N3	N3	N3	N3	N3	N3	N3	N4	N4	N3	O25
HG00341	N3a3	2.76612	N	IJ	N	N	IJ	IJ	N	O	O	N	H	N	N	N	N	N	N	N	N	N	N	N	O	C	N	N	N	N	N	N	N	N	N	N	N	N	N3	N3	N3	N3	N3	N3	N3	N3	N4	N4	G
HG00369	N3a3	1.80455	N	IJ	N	IJ	IJ	IJ	N	N	O	N	G	AB	N	N	N	N	N	N	N	O	N	N	H	N	N	N	N	N	N	N	N	N	N	N	N	N	N3	N3	N3	N3	N3	N3	N3	N4	N4	N4	H
HG00280	N3a3	1.52506	N	N	IJ	N	IJ	N	N	N	O	O	H	N	N	N	N	N	N	N	N	N	N	N	H	AB	N	N	N	N	N	N	N	N	N	N	N	N	N3	N3	N3	N3	N3	N3	N4	N3	N4	O25	O25
HG00342	N3a3	2.17634	N	IJ	N	N	IJ	N	N	N	O	N	O	R	N	N	N	N	N	N	N	N	N	N	N	R	N	N	N	N	N	N	N	N	N	N	N	N	N3	N3	N3	N3	N3	N3	N3	N3	N3	O25	H
HG00284	N3a4k	1.72137	N	IJ	IJ	IJ	IJ	IJ	IJ	N	H	O	H	O	N	N	N	N	N	N	N	N	N	N	O	N	N	N	N	N	N	N	N	N	N	N	N	H	N3	N3	N3	N3	N3	N3	N3	N4	N3	R1b	R1b
HG00375	N3a4k	1.45474	N	IJ	N	IJ	N	N	N	N	N	N	O	O	N												N	N	N	N	N	N	N	N	N	N	N	H	N3	N3	N3	N3	N3	N3	N3	N3	N4	O6	O6
HG00187	N3a4k	1.15644	N	N	N	N	IJ	N	N	O	N	O	N	O	N												N	N	N	N	N	N	N	N	N	N	H	N	N3	N3	N3	N3	N3	N3	N3	N3	N3	N3	J2
HG00278	N3a4k	1.45366	N	N	IJ	N	N	IJ	N	N	N	O	H	E	N	N	N	N	N	N	N	N	N	O	H	G	N	N	N	N	N	N	N	N	N	O	N	AB	N3	N3	N3	N3	N3	N3	N3	N3	N3	N4	N4
HG00371	N3a4k	2.75184	N	IJ	N	N	N	IJ	N	O	O	N	N	N	N	N	N	N	N	N	N	N	N	N	O	N	N	N	N	N	N	N	N	N	N	N	N	N	N3	N3	N3	N3	N3	N4	N3	N3	N3	H	N3
HG00182	N3a4k	1.90555	N	N	N	N	N	N	N	N	O	N	H	O	N	N	N	N	N	N	N	N	N	N	N	IJ	N	N	N	N	N	N	N	N	N	N	N	N	N3	N3	N3	N3	N3	N3	N3	N3	N3	N3	O25
HG00183	N3a4k	1.52497	N	IJ	IJ	IJ	N	N	IJ	H	O	H	O	H	N												N	N	N	N	N	N	N	N	N	N	N	O	N3	N3	N3	N3	N3	N3	N3	N3	N4	N4	N4
HG00311	N3a4k	1.49005	N	N	N	N	N	IJ	N	N	O	O	O	O	N	N	N	N	N	N	N	N	N	N	N	N	N	N	N	N	N	N	N	N	N	N	N	N	N3	N3	N3	N3	N3	N3	N3	N3	N3	N4	N3
HG00188	N3a4k	2.81461	N	N	N	N	N	N	O	O	O	N	H	H	N	N	N	N	N	N	N	N	N	N	N	O	N	N	N	N	N	N	N	N	N	N	N	O	N3	N3	N3	N3	N3	N3	N3	N3	N3	N3	H
HG00335	N3a4k	4.03405	N	IJ	N	N	N	IJ	N	N	N	N	O	O	N	N	N	N	N	N	N	N	N	O	N	O	N	N	N	N	N	N	N	N	N	N	N	AB	N3	N3	N3	N3	N3	N3	N3	N3	N4	O25	O6
HG00185	N3a4k	2.67966	N	N	N	N	N	IJ	IJ	N	O	O	N	N	N												N	N	N	N	N	N	N	N	N	N	N	N	N3	N3	N3	N3	N3	N3	N3	N4	N4	N4	N3
HG00271	N3a4k	3.07364	N	IJ	N	N	N	IJ	N	H	N	N	N	O	N	N	N	N	N	N	N	N	H	N	O	Q	N	N	N	N	N	N	N	N	N	N	N	N	N3	N3	N3	N3	N3	N3	N3	N3	N3	H	O25
HG00273	N3a4k	2.63054	N	IJ	N	N	IJ	N	N	O	O	N	O	O	N	N	N	N	N	N	N	N	N	N	O	N	N	N	N	N	N	N	N	N	N	N	N	N	N3	N3	N3	N3	N3	N3	N3	N3	N3	N4	J2
HG00290	N3a4k	2.83202	N	IJ	N	N	N	IJ	N	N	O	G	O	N	N												N	N	N	N	N	N	N	N	N	N	N	N	N3	N3	N3	N3	N3	N3	N3	N3	N3	N3	N3
HG00336	N3a4k	1.39329	N	IJ	IJ	N	N	N	H	O	O	N	O	O	N	N	N	N	N	N	N	N	N	O	O	G	N	N	N	N	N	N	N	N	N	N	H	H	N3	N3	N3	N3	N3	N3	N3	N3	N4	N4	H
HG00338	N3a4k	1.11198	N	IJ	IJ	IJ	IJ	IJ	IJ	O	N	O	H	O	N	N	N	N	N	N	N	N	N	N	N	H	N	N	N	N	N	N	N	N	N	N	N	E	N3	N3	N3	N3	N3	N3	N3	N3	N4	O25	R1b
HG00358	N3a4k	3.07257	N	N	N	N	N	N	N	N	H	N	N	N	N	N	N	N	N	N	N	N	N	N	N	N	N	N	N	N	N	N	N	N	N	N	N	N	N3	N3	N3	N3	N3	N3	N3	N4	N3	N4	O25
HG00329	N3a4k	1.65078	N	IJ	IJ	IJ	IJ	IJ	IJ	N	N	N	H	H	N	N	N	N	N	N	N	N	O	O	H	O	N	N	N	N	N	N	N	N	N	N	N	C	N3	N3	N3	N3	N3	N4	N4	N3	O25	J2	G
NA18558	N4	3.06059	N	IJ	IJ	IJ	IJ	IJ	IJ	O	O	O	H	O	N												N	N	N	N	N	N	N	N	N	N	O	AB	N4	N4	N4	N4	N4	N4	N4	N4	N4	N4	H
NA18608	N4	3.56448	N	IJ	IJ	N	N	IJ	IJ	H	O	H	N	O	N	N	N	N	N	N	N	N	N	N	O	R	N	N	N	N	N	N	N	N	N	N	N	IJ	N4	N4	N4	N4	N4	N4	N4	N4	N4	N4	H
NA18747	N4	3.50003	N	IJ	N	N	N	N	N	O	O	H	O	O	N	N	N	N	N	N	N	N	N	H	R	C	N	N	N	N	N	N	N	N	N	N	N	N	N4	N4	N4	N4	N4	N4	N4	N4	N4	N4	N4
NA18748	N4	2.50425	N	IJ	N	N	IJ	IJ	N	O	O	H	N	O	N	N	N	N	N	N	N	N	N	H	G	LT	N	N	N	N	N	N	N	N	N	N	N	AB	N4	N4	N4	N4	N4	N4	N4	N4	N4	H	O25
HG02138	N4	3.4281	N	IJ	N	IJ	IJ	N	N	N	O	H	H	N	N												N	N	N	N	N	N	N	N	N	N	O	N	N4	N4	N4	N4	N4	N4	N4	N4	N4	O1	O6
HG04015	N4	2.03989	N	IJ	N	N	N	IJ	N	H	O	H	H	N	N	N	N	N	N	N	N	N	H	H	H	H	N	N	N	N	N	N	N	N	N	N	O	O	N4	N4	N4	N4	N4	N4	N4	N4	N4	H	N4
NA18639	N4	2.01346	N	IJ	N	N	N	N	N	O	O	N	H	AB	N												N	N	N	N	N	N	N	N	N	N	N	N	N4	N4	N4	N4	N4	N4	N4	N4	N4	H	O6
HG00580	O1a	1.71104	O	O	O	O	O	O	O	O	O	O	AB	IJ	O												O	O	O	O	O	O	O	O	O	O	O	O	O1	O1	O1	O1	O1	O1	O1	O1	O1	O1	O1
HG00595	O1a	1.81937	O	O	O	O	O	O	O	O	O	O	O	O	O	O	O	O	O	O	O	O	O	O	H	O	O	O	O	O	O	O	O	O	O	O	O	AB	O1	O1	O1	O1	O1	O1	O1	O1	O1	O1	O1
HG01811	O1a	2.41848	O	O	O	O	O	O	O	O	H	IJ	O	H	O	O	O	O	O	O	O	O	O	O	O	R	O	O	O	O	O	O	O	O	O	O	O	H	O1	O1	O1	O1	O1	O1	O1	O1	O1	O1	O1
HG02017	O1a	1.79233	O	O	O	O	O	O	IJ	O	O	O	O	AB	O	O	O	O	O	O	O	O	O	O	R	O	O	O	O	O	O	O	O	O	O	O	O	H	O1	O1	O1	O1	O1	O1	O1	O1	O1	O1	O25
HG02079	O1a	4.85174	O	O	O	O	O	O	O	O	O	O	O	O	O	O	O	O	O	O	O	O	O	O	O	O	O	O	O	O	O	O	O	O	O	O	O	O	O1	O1	O1	O1	O1	O1	O1	O1	O1	O1	O6
HG02250	O1a	2.53102	O	O	O	O	O	O	O	O	O	O	O	O	O	O	O	O	O	O	O	O	O	O	O	H	O	O	O	O	O	O	O	O	O	H	O	O	O1	O1	O1	O1	O1	O1	O1	O1	O1	O1	O1
HG02353	O1a	2.39461	O	O	O	O	O	O	O	O	IJ	O	O	N	O	O	O	O	O	O	O	O	O	O	C	O	O	O	O	O	O	O	O	O	O	N	O	R	O1	O1	O1	O1	O1	O1	O1	O1	O1	O1	O1
HG02360	O1a	2.47416	O	O	O	O	O	O	O	O	O	O	O	N	O	O	O	O	O	O	O	O	O	O	O	Q	O	O	O	O	O	O	O	O	O	O	O	C	O1	O1	O1	O1	O1	O1	O1	O1	O1	O25	O1
HG02363	O1a	2.34893	O	O	O	O	O	O	O	O	O	O	N	G	O	O	O	O	O	O	O	O	O	O	O	H	O	O	O	O	O	O	O	O	O	O	O	O	O1	O1	O1	O1	O1	O1	O1	O1	O1	O1	O1
HG02377	O1a	2.06838	O	O	O	O	O	O	O	O	O	O	G	AB	O												O	O	O	O	O	O	O	O	O	O	O	H	O1	O1	O1	O1	O1	O1	O1	O1	O1	O1	O1
HG02384	O1a	2.29344	O	O	O	O	O	O	O	O	O	O	O	N	O	O	O	O	O	O	O	O	O	O	O	R	O	O	O	O	O	O	O	O	O	H	LT	O	O1	O1	O1	O1	O1	O1	O1	O1	O1	O1	O1
HG02385	O1a	1.61413	O	O	O	O	O	O	O	O	O	O	H	AB	O	O	O	O	O	O	O	O	O	O	O	C	O	O	O	O	O	O	O	O	O	O	H	O	O1	O1	O1	O1	O1	O1	O1	O1	O1	O1	O25
HG02396	O1a	1.96479	O	O	O	O	O	O	O	IJ	O	O	O	O	O	O	O	O	O	O	O	O	O	O	O	R	O	O	O	O	O	O	O	O	O	O	O	R	O1	O1	O1	O1	O1	O1	O1	O1	O1	O25	O1
HG02399	O1a	2.11055	O	O	O	O	O	O	O	O	O	O	H	O	O	O	O	O	O	O	O	O	O	O	O	R	O	O	O	O	O	O	O	O	O	O	O	R	O1	O1	O1	O1	O1	O1	O1	O1	O1	O1	O25
NA18536	O1a	2.96615	O	O	O	O	O	O	O	O	O	O	O	O	O	O	O	O	O	O	O	O	O	O	O	R	O	O	O	O	O	O	O	O	O	O	O	O	O1	O1	O1	O1	O1	O1	O1	O1	O25	O1	O1
NA18606	O1a	3.23371	O	O	O	O	O	O	O	O	O	O	O	O	O	O	O	O	O	O	O	O	O	O	O	G	O	O	O	O	O	O	O	O	O	O	H	G	O1	O1	O1	O1	O1	O1	O1	O1	O1	O6	O1
NA18632	O1a	3.52073	O	O	O	O	O	O	O	O	O	O	O	O	O	O	O	O	O	O	O	O	O	O	O	O	O	O	O	O	O	O	O	O	O	O	O	C	O1	O1	O1	O1	O1	O1	O1	O1	O25	O25	O1
NA18740	O1a	2.97476	O	O	O	O	O	O	O	O	O	O	O	O	O	O	O	O	O	O	O	O	O	O	O	O	O	O	O	O	O	O	O	O	O	O	O	O	O1	O1	O1	O1	O1	O1	O1	O1	O1	O1	O6
NA18647	O1b	3.49857	O	O	O	O	O	O	O	O	O	O	O	O	O												O	O	O	O	O	O	O	O	O	O	O	G	O1	O1	O1	O1	O1	O1	O1	O1	O1	O1	O1
HG00406	O2	2.2726	O	O	O	O	O	O	O	O	O	O	N	AB	O												O	O	O	O	O	O	O	O	O	O	O	O	O25	O25	O25	O25	O25	O25	O25	O25	O25	O6	O25
HG00457	O2	2.69581	O	O	O	O	O	O	O	O	O	O	H	AB	O	O	O	O	O	O	O	O	O	O	O	O	O	O	O	O	O	O	O	O	O	O	O	O	O25	O25	O25	O25	O25	O25	O25	O25	O25	O25	O25
HG00634	O2	1.45478	O	O	O	O	O	O	O	O	O	O	O	O	O	O	O	O	O	O	O	O	O	O	O	H	O	O	O	O	O	O	O	O	O	H	H	O	O25	O25	O25	O25	O25	O25	O25	O25	O25	O25	O25
HG02076	O2	4.92	O	O	O	O	O	O	O	O	O	H	O	N	O	O	O	O	O	O	O	O	O	O	H	O	O	O	O	O	O	O	O	O	O	O	O	E	O25	O25	O25	O25	O25	O25	O25	O25	O25	O25	R1b
NA18534	O2	1.05989	O	O	O	O	O	O	O	O	O	O	H	R	O	O	O	O	O	O	O	O	O	O	O	O	O	O	O	O	O	O	O	O	O	IJ	O	O	O25	O25	O25	O25	O25	O25	O25	O25	O25	O25	O25
NA18603	O2	3.6731	O	O	O	O	O	O	O	O	O	O	G	O	O	O	O	O	O	O	O	O	O	O	O	R	O	O	O	O	O	O	O	O	O	O	O	O	O25	O25	O25	O25	O25	O25	O25	O25	O25	O25	O25
NA18637	O2	3.55924	O	O	O	O	O	O	O	IJ	O	O	O	O	O	O	O	O	O	O	O	O	O	O	O	R	O	O	O	O	O	O	O	O	O	O	O	G	O25	O25	O25	O25	O25	O25	O25	O25	O25	O25	O1
NA18638	O2	3.01846	O	O	O	O	O	O	O	O	O	O	N	O	O	O	O	O	O	O	O	O	O	O	H	H	O	O	O	O	O	O	O	O	O	O	O	O	O25	O25	O25	O25	O25	O25	O25	O25	O25	O25	O25
NA19055	O2	1.99908	O	IJ	IJ	IJ	IJ	IJ	O	O	O	O	AB	C	O	O	O	O	O	O	O	O	O	O	O	E	O	O	O	O	O	O	O	O	O	H	O	E	O25	J2	O25	O25	O25	O25	O25	O25	H	O25	O25
HG00442	O2a	4.02145	O	O	O	O	O	O	O	O	O	H	O	H	O	O	O	O	O	O	O	O	O	O	O	O	O	O	O	O	O	O	O	O	O	O	O	C	O25	O25	O25	O25	O25	O25	O25	O25	O25	O25	O25
HG00701	O2a	1.73578	O	O	O	O	O	O	O	O	O	O	O	H	O												O	O	O	O	O	O	O	O	O	O	O	O	O25	O25	O25	O25	O25	O25	O25	O25	O25	O25	O25
HG00728	O2a	3.41538	O	O	O	O	O	O	IJ	IJ	O	O	N	O	O	O	O	O	O	O	O	O	O	H	O	O	O	O	O	O	O	O	O	O	O	O	O	E	O25	O25	O25	O25	O25	O25	O25	O25	O25	O25	O6
HG00844	O2a	3.80608	O	O	O	O	O	IJ	O	O	O	O	O	R	O	O	O	O	O	O	O	O	O	O	O	O	O	O	O	O	O	O	O	O	O	O	H	H	O25	O25	O25	O25	O25	O25	O25	O25	O25	O25	O6
HG00982	O2a	2.61416	O	O	O	O	O	O	O	O	O	IJ	O	H	O	O	O	O	O	O	O	O	O	O	O	H	O	O	O	O	O	O	O	O	O	H	O	O	O25	O25	O25	O25	O25	O25	O25	O25	O25	O25	O25
HG01028	O2a	2.65656	O	O	O	O	O	O	O	O	O	H	O	H	O												O	O	O	O	O	O	O	O	O	O	O	O	O25	O25	O25	O25	O25	O25	O25	O25	O25	O25	O25
HG01031	O2a	1.95612	O	O	O	O	O	O	O	O	O	N	R	O	O	O	O	O	O	O	O	O	O	O	O	H	O	O	O	O	O	O	O	O	O	O	O	N	O25	O25	O25	O25	O25	O25	O25	O25	O25	O25	O25
HG01840	O2a	2.56455	O	O	O	O	O	O	O	O	O	O	N	O	O	O	O	O	O	O	O	O	O	O	O	O	O	O	O	O	O	O	O	O	O	O	O	H	O25	O25	O25	O25	O25	O25	O25	O25	O25	O25	O25
HG01842	O2a	2.53888	O	O	O	O	O	O	O	O	O	R	O	AB	O	O	O	O	O	O	O	O	O	O	O	O	O	O	O	O	O	O	O	O	O	O	O	H	O25	O25	O25	O25	O25	O25	O25	O25	O25	O25	O25
HG01844	O2a	2.68571	O	O	O	O	O	O	O	O	O	O	O	N	O	O	O	O	O	O	O	O	O	O	O	R	O	O	O	O	O	O	O	O	O	O	N	E	O25	O25	O25	O25	O25	O25	O25	O25	O25	O25	O1
HG01846	O2a	2.72295	O	O	O	O	O	O	O	O	O	O	O	AB	O	O	O	O	O	O	O	O	O	O	O	O	O	O	O	O	O	O	O	O	O	O	H	O	O25	O25	O25	O25	O25	O25	O25	O25	O25	O25	O25
HG01849	O2a	2.64423	O	O	O	O	O	O	O	O	O	O	O	O	O	O	O	O	O	O	O	O	O	O	O	H	O	O	O	O	O	O	O	O	O	O	O	G	O25	O25	O25	O25	O25	O25	O25	O25	O25	O25	O25
HG01865	O2a	3.06935	O	O	O	O	O	O	IJ	O	O	G	H	O	O	O	O	O	O	O	O	O	O	H	O	O	O	O	O	O	O	O	O	O	O	O	O	Q	O25	O25	O25	O25	O25	O25	O25	O25	O25	O25	O25
HG01867	O2a	2.52943	O	O	O	O	O	O	O	IJ	O	O	O	O	O	O	O	O	O	O	O	O	O	O	O	IJ	O	O	O	O	O	O	O	O	O	O	O	AB	O25	O25	O25	O25	O25	O25	O25	O25	O25	O25	O25
HG01873	O2a	9.16419	O	O	O	O	O	O	O	O	O	O	O	O	O	O	O	O	O	O	O	O	O	O	O	Q	O	O	O	O	O	O	O	O	O	O	Q	O	O25	O25	O25	O25	O25	O25	O25	O25	O25	O25	O25
HG02020	O2a	2.31658	O	O	O	IJ	O	O	IJ	O	O	O	O	E	O	O	O	O	O	O	O	O	O	O	O	N	O	O	O	O	O	O	O	O	O	O	H	N	O25	O25	O25	O25	O25	O25	O25	O25	O25	O25	O25
HG02032	O2a	3.05443	O	O	O	O	O	O	O	O	O	N	O	E	O	O	O	O	O	O	O	O	O	O	O	O	O	O	O	O	O	O	O	O	O	H	O	IJ	O25	O25	O25	O25	O25	O25	O25	O25	O25	O25	O25
HG02061	O2a	2.37551	O	O	O	O	O	O	O	O	O	O	E	G	O	O	O	O	O	O	O	O	O	O	H	O	O	O	O	O	O	O	O	O	O	O	O	C	O25	O25	O25	O25	O25	O25	O25	O25	O25	O25	O1
HG02064	O2a	2.11419	O	O	O	O	O	O	O	O	O	G	O	O	O	O	O	O	O	O	O	O	O	O	IJ	O	O	O	O	O	O	O	O	O	O	O	IJ	R	O25	O25	O25	O25	O25	O25	O25	O25	O25	O25	O25
HG02085	O2a	3.24011	O	O	O	O	O	O	O	O	O	O	O	O	O	O	O	O	O	O	O	O	O	O	O	E	O	O	O	O	O	O	O	O	O	O	O	N	O25	O25	O25	O25	O25	O25	O25	O25	O25	O25	O25
HG02351	O2a	1.95748	O	O	O	O	O	O	O	O	O	N	O	C	O	O	O	O	O	O	O	O	O	O	H	R	O	O	O	O	O	O	O	O	O	O	O	O	O25	O25	O25	O25	O25	O25	O25	O25	O25	O25	O25
HG02356	O2a	2.42855	O	O	O	O	O	O	O	O	O	N	O	O	O	O	O	O	O	O	O	O	O	O	O	N	O	O	O	O	O	O	O	O	O	O	O	IJ	O25	O25	O25	O25	O25	O25	O25	O25	O25	O25	O25
HG02364	O2a	2.17807	O	O	O	O	O	O	O	O	O	O	O	O	O												O	O	O	O	O	O	O	O	O	O	O	H	O25	O25	O25	O25	O25	O25	O25	O25	O25	O25	O25
HG02374	O2a	2.40892	O	O	O	O	O	O	IJ	H	O	N	H	N	O	O	O	O	O	O	O	O	O	H	O	G	O	O	O	O	O	O	O	O	O	O	O	G	O25	O25	O25	O25	O25	O25	O25	O25	O25	O25	O25
HG02382	O2a	2.21378	O	O	O	O	O	O	O	O	O	O	O	AB	O	O	O	O	O	O	O	O	O	O	O	O	O	O	O	O	O	O	O	O	O	O	O	Q	O25	O25	O25	O25	O25	O25	O25	O25	O25	O25	O25
HG02386	O2a	2.21515	O	O	O	O	O	O	O	O	O	O	O	O	O	O	O	O	O	O	O	O	O	O	O	O	O	O	O	O	O	O	O	O	O	O	O	H	O25	O25	O25	O25	O25	O25	O25	O25	O25	G	O25
HG02389	O2a	1.9679	O	O	O	O	O	O	O	O	O	H	O	O	O	O	O	O	O	O	O	O	O	O	O	H	O	O	O	O	O	O	O	O	O	O	O	Q	O25	O25	O25	O25	O25	O25	O25	O25	O25	O25	O25
HG02390	O2a	2.39798	O	O	O	O	O	O	O	O	O	O	O	G	O	O	O	O	O	O	O	O	O	O	O	Q	O	O	O	O	O	O	O	O	O	O	O	IJ	O25	O25	O25	O25	O25	O25	O25	O25	O25	O25	O25
HG02394	O2a	2.19218	O	O	O	O	O	O	O	O	O	IJ	N	O	O	O	O	O	O	O	O	O	O	O	O	O	O	O	O	O	O	O	O	O	O	O	O	H	O25	O25	O25	O25	O25	O25	O25	O25	O25	O25	H
HG02395	O2a	2.23774	O	O	O	O	O	O	O	O	O	O	O	O	O	O	O	O	O	O	O	O	O	O	O	IJ	O	O	O	O	O	O	O	O	O	O	O	LT	O25	O25	O25	O25	O25	O25	O25	O25	O25	O25	O25
HG02397	O2a	1.53921	O	O	O	O	O	O	O	O	O	O	H	O	O	O	O	O	O	O	O	O	O	O	O	E	O	O	O	O	O	O	O	O	O	O	O	O	O25	O25	O25	O25	O25	O25	O25	O25	O25	O25	O25
HG02398	O2a	2.5885	O	O	O	O	O	O	O	O	O	O	O	H	O												O	O	O	O	O	O	O	O	O	O	O	G	O25	O25	O25	O25	O25	O25	O25	O25	O25	O6	O25
HG02401	O2a	2.25263	O	O	O	O	O	O	O	O	O	O	O	O	O												O	O	O	O	O	O	O	O	O	O	O	G	O25	O25	O25	O25	O25	O25	O25	O25	O25	O25	O1
HG02402	O2a	2.04553	O	O	O	O	O	O	O	O	O	G	N	H	O												O	O	O	O	O	O	O	O	O	O	O	O	O25	O25	O25	O25	O25	O25	O25	O25	O25	O25	O6
HG02407	O2a	2.19061	O	O	O	O	O	O	O	O	O	H	O	N	O	O	O	O	O	O	O	O	O	O	O	O	O	O	O	O	O	O	O	O	O	O	O	O	O25	O25	O25	O25	O25	O25	O25	O25	O25	O25	O25
HG02408	O2a	2.70176	O	O	O	O	O	O	O	O	O	O	O	O	O	O	O	O	O	O	O	O	O	O	O	H	O	O	O	O	O	O	O	O	O	O	O	O	O25	O25	O25	O25	O25	O25	O25	O25	O25	J2	O6
HG02409	O2a	2.22198	O	O	O	O	O	O	O	O	H	O	N	AB	O	O	O	O	O	O	O	O	O	H	H	H	O	O	O	O	O	O	O	O	O	O	O	G	O25	O25	O25	O25	O25	O25	O25	O25	O25	O25	H
HG02410	O2a	3.48578	O	O	O	O	O	IJ	IJ	O	O	O	O	G	O												O	O	O	O	O	O	O	O	O	O	O	O	O25	O25	O25	O25	O25	O25	O25	O25	O25	O25	O25
HG02512	O2a	2.67601	O	O	O	O	O	O	O	O	O	O	O	O	O												O	O	O	O	O	O	O	O	O	O	O	O	O25	O25	O25	O25	O25	O25	O25	O25	O25	O25	O25
HG02521	O2a	2.67558	O	O	O	O	O	O	O	O	O	N	O	H	O	O	O	O	O	O	O	O	O	O	H	H	O	O	O	O	O	O	O	O	O	O	O	O	O25	O25	O25	O25	O25	O25	O25	O25	O25	O25	O25
HG04140	O2a	2.10711	O	O	O	O	O	O	O	O	O	O	H	N	O	O	O	O	O	O	O	O	O	O	O	AB	O	O	O	O	O	O	O	O	O	O	O	O	O25	O25	O25	O25	O25	O25	O25	O25	O25	O25	O25
HG04173	O2a	1.92762	O	O	O	O	O	O	O	O	O	O	O	E	O	O	O	O	O	O	O	O	O	IJ	Q	R	O	O	O	O	O	O	O	O	O	O	O	R	O25	O25	O25	O25	O25	O25	O25	O25	O25	O25	O25
NA18636	O2a	3.72662	O	O	O	O	O	O	IJ	O	O	O	G	H	O	O	O	O	O	O	O	O	O	O	O	C	O	O	O	O	O	O	O	O	O	O	O	N	O25	O25	O25	O25	O25	O25	O25	O25	O25	O25	R1b
NA19009	O2a	1.63689	O	O	O	O	O	O	O	O	O	O	G	H	O	O	O	O	O	O	O	O	O	O	O	R	O	O	O	O	O	O	O	O	O	O	O	O	O25	O25	O25	O25	O25	O25	O25	O25	O25	O25	O25
HG01810	O3a	2.33732	O	O	O	O	O	O	IJ	O	O	H	IJ	O	O	O	O	O	O	O	O	O	O	O	H	R	O	O	O	O	O	O	O	O	O	H	H	R	O3	O3	O3	O3	O3	O3	O3	O3	O3	O6	O6
HG01866	O3a	1.71538	O	O	O	O	O	O	O	O	O	O	N	H	O												O	O	O	O	O	O	O	O	O	O	O	R	O3	O3	O3	O3	O3	O3	O3	O6	O3	O6	O3
HG02355	O3a	2.02752	O	O	O	O	O	O	O	O	O	O	H	O	O	O	O	O	O	O	O	O	O	O	O	O	O	O	O	O	O	O	O	O	O	O	O	O	O3	O3	O3	O3	O3	O3	O3	O3	O3	O3	O6
HG02379	O3a	2.52067	O	O	O	O	O	O	O	O	O	O	O	O	O												O	O	O	O	O	O	O	O	O	O	O	O	O3	O3	O3	O3	O3	O3	O3	O3	O6	O6	O3
HG02380	O3a	2.40247	O	O	O	O	O	O	O	O	O	O	O	Q	O	O	O	O	O	O	O	O	O	O	O	O	O	O	O	O	O	O	O	O	O	O	O	H	O3	O3	O3	O3	O3	O3	O3	O25	O3	O25	O1
HG02383	O3a	2.48012	O	O	O	O	O	O	O	O	O	O	O	O	O												O	O	O	O	O	O	O	O	O	O	O	Q	O3	O3	O3	O3	O3	O3	O3	O25	O3	O6	O6
HG02387	O3a	1.95287	O	O	O	O	O	O	O	O	O	R	IJ	O	O	O	O	O	O	O	O	O	O	O	H	O	O	O	O	O	O	O	O	O	O	O	LT	H	O3	O3	O3	O3	O3	O3	O3	O3	O3	O6	O6
HG02388	O3a	2.49503	O	O	O	O	O	O	O	O	O	G	O	O	O	O	O	O	O	O	O	O	O	O	H	IJ	O	O	O	O	O	O	O	O	O	O	O	O	O3	O3	O3	O3	O3	O3	O3	O3	O3	O1	O6
HG02391	O3a	2.33245	O	O	O	O	O	O	O	O	O	O	O	O	O	O	O	O	O	O	O	O	O	O	O	O	O	O	O	O	O	O	O	O	O	O	O	O	O3	O3	O3	O3	O3	O3	O3	O3	O3	O6	O25
HG02406	O3a	2.4092	O	O	O	O	O	O	O	O	O	N	H	O	O	O	O	O	O	O	O	O	O	O	O	H	O	O	O	O	O	O	O	O	O	O	O	AB	O3	O3	O3	O3	O3	O3	O3	O3	O6	O3	R1b
HG00409	O3a	3.6779	O	O	O	O	O	O	O	O	O	O	O	AB	O	O	O	O	O	O	O	O	O	O	O	E	O	O	O	O	O	O	O	O	O	O	O	LT	O3	O3	O3	O3	O3	O3	O3	O6	O3	O25	O6
HG00565	O3a	1.50003	O	O	O	O	O	O	O	O	H	H	O	H	O	O	O	O	O	O	O	O	O	O	LT	O	O	O	O	O	O	O	O	O	O	O	O	LT	O3	O3	O3	O3	O3	O3	O3	O3	O6	H	O25
HG00592	O3a	1.40861	O	O	O	O	O	IJ	O	O	O	H	O	O	O	O	O	O	O	O	O	O	O	O	O	H	O	O	O	O	O	O	O	O	O	O	O	R	O3	O3	O3	O3	O3	O3	O3	O3	O3	O25	O25
HG00598	O3a	3.686	O	O	O	O	O	O	O	O	O	O	H	IJ	O	O	O	O	O	O	O	O	O	O	H	R	O	O	O	O	O	O	O	O	O	O	O	Q	O3	O3	O3	O3	O3	O3	O3	O3	O3	O6	O6
HG00619	O3a	1.73425	O	O	O	O	O	O	O	O	O	O	O	N	O	O	O	O	O	O	O	O	O	O	C	H	O	O	O	O	O	O	O	O	O	O	O	LT	O3	O3	O3	O3	O3	O3	O3	O6	O6	O6	H
HG00881	O3a	2.93582	O	O	O	O	O	O	O	IJ	O	O	N	O	O	O	O	O	O	O	O	O	O	O	O	R	O	O	O	O	O	O	O	O	O	O	O	O	O3	O3	O3	O3	O3	O3	O3	O3	O3	O3	O6
HG01852	O3a	2.46705	O	O	O	O	O	O	O	O	O	O	O	H	O												O	O	O	O	O	O	O	O	O	O	H	H	O3	O3	O3	O3	O3	O3	O3	O3	O3	O6	R1b
HG02082	O3a	3.44151	O	O	O	O	O	O	O	O	O	N	H	O	O	O	O	O	O	O	O	O	O	O	H	C	O	O	O	O	O	O	O	O	O	O	O	H	O3	O3	O3	O3	O3	O3	O3	O3	O3	O6	H
HG02122	O3a	3.04423	O	O	O	O	O	O	O	O	O	O	H	G	O	O	O	O	O	O	O	O	O	O	LT	O	O	O	O	O	O	O	O	O	O	O	O	N	O3	O3	O3	O3	O3	O3	O3	O3	O6	O6	O6
HG02371	O3a	1.93399	O	O	O	O	O	O	O	O	N	O	H	H	O	O	O	O	O	O	O	O	O	O	O	H	O	O	O	O	O	O	O	O	O	O	G	LT	O3	O3	O3	O3	O3	O3	O3	O3	O3	O6	O1
HG02372	O3a	1.4628	O	O	O	O	O	O	O	O	O	N	O	H	O	O	O	O	O	O	O	O	O	O	R	N	O	O	O	O	O	O	O	O	O	O	O	O	O3	O3	O3	O3	O3	O3	O3	O3	O3	O6	O25
HG02375	O3a	2.43356	O	O	O	O	O	O	O	O	O	O	H	G	O	O	O	O	O	O	O	O	O	O	O	O	O	O	O	O	O	O	O	O	O	O	Q	Q	O3	O3	O3	O3	O3	O3	O3	O3	O3	O6	O3
HG03830	O3a	2.4257	O	O	O	O	O	O	IJ	O	O	N	O	O	O	O	O	O	O	O	O	O	O	O	H	G	O	O	O	O	O	O	O	O	O	O	O	R	O3	O3	O3	O3	O3	O3	O3	O3	O3	O3	J2
HG04134	O3a	1.96356	O	O	O	O	O	O	O	O	O	O	O	H	O	O	O	O	O	O	O	O	O	O	O	H	O	O	O	O	O	O	O	O	O	O	O	H	O3	O3	O3	O3	O3	O3	O3	O25	O3	O3	H
NA18530	O3a		O												O												O												O3
NA18548	O3a	2.29942	O	O	O	O	O	O	O	O	O	O	O	AB	O												O	O	O	O	O	O	O	O	O	O	O	O	O3	O6	O6	O3	O6	O3	O3	O3	O6	O6	O6
NA18557	O3a	2.94135	O	O	O	O	O	O	O	O	O	H	O	O	O												O	O	O	O	O	O	O	O	O	O	O	O	O3	O3	O3	O3	O3	O3	O3	O6	O3	H	H
NA18622	O3a	4.27519	O	O	O	O	O	O	IJ	O	O	O	G	H	O	O	O	O	O	O	O	O	O	O	H	R	O	O	O	O	O	O	O	O	O	O	O	AB	O3	O3	O3	O3	O3	O3	O3	O6	O6	O6	O6
NA18623	O3a	4.34801	O	O	O	O	O	O	H	O	O	O	O	N	O	O	O	O	O	O	O	O	O	O	O	E	O	O	O	O	O	O	O	O	O	O	O	H	O3	O3	O3	O3	O3	O3	O3	O3	O3	O6	I1
NA18624	O3a	3.42978	O	O	O	O	O	O	IJ	O	O	O	O	O	O	O	O	O	O	O	O	O	O	O	O	H	O	O	O	O	O	O	O	O	O	O	O	IJ	O3	O3	O3	O3	O3	O3	O3	O3	O6	O25	O6
NA18757	O3a	2.49799	O	O	O	O	O	O	IJ	O	O	N	O	O	O	O	O	O	O	O	O	O	O	O	O	IJ	O	O	O	O	O	O	O	O	O	O	O	O	O3	O3	O3	O3	O3	O3	O3	O3	O6	O6	O6
NA18945	O3a	2.62801	O	O	O	O	O	O	O	O	O	O	O	R	O	O	O	O	O	O	O	O	O	O	H	LT	O	O	O	O	O	O	O	O	O	O	Q	H	O3	O3	O3	O3	O3	O3	O3	O3	O6	O6	O6
NA19062	O3a	1.7323	O	O	O	O	O	O	H	O	O	O	H	N	O	O	O	O	O	O	O	O	O	O	O	C	O	O	O	O	O	O	O	O	O	O	O	H	O3	O3	O3	O3	O3	O3	O3	O3	O3	H	O3
NA19072	O3a	5.35013	O	O	O	O	O	O	O	O	O	H	O	R	O	O	O	O	O	O	O	O	O	O	O	H	O	O	O	O	O	O	O	O	O	O	O	O	O3	O3	O3	O3	O3	O3	O3	O3	O3	O6	O6
NA19085	O3a	4.1704	O	O	O	O	O	O	IJ	O	O	O	O	O	O	O	O	O	O	O	O	O	O	O	O	O	O	O	O	O	O	O	O	O	O	O	O	H	O3	O3	O3	O3	O3	O3	O3	O3	O6	O6	O6
NA19086	O3a	3.21445	O	O	O	O	O	O	O	O	O	O	O	O	O	O	O	O	O	O	O	O	O	O	O	LT	O	O	O	O	O	O	O	O	O	O	O	H	O3	O3	O3	O3	O3	O3	O3	O3	O3	O3	O1
HG00524	O3b	1.07834	O	O	O	O	IJ	O	O	O	O	O	O	N	O	O	O	O	O	O	O	O	O	O	O	H	O	O	O	O	O	O	O	O	O	O	O	Q	O3	O3	O3	O3	O3	O6	O3	O6	O6	O6	O6
HG00583	O3b	1.84564	O	O	O	O	IJ	O	O	O	O	O	O	H	O												O	O	O	O	O	O	O	O	O	O	O	O	O3	O3	O3	O3	O3	O3	O3	O3	O3	O6	O6
HG00589	O3b	1.66854	O	O	O	O	O	O	O	O	O	O	O	O	O	O	O	O	O	O	O	O	O	O	O	E	O	O	O	O	O	O	O	O	O	O	O	H	O3	O3	O3	O3	O3	O3	O3	O3	O25	O6	O25
HG00683	O3b	1.78748	O	O	O	O	O	O	O	O	O	O	N	O	O	O	O	O	O	O	O	O	O	O	H	O	O	O	O	O	O	O	O	O	O	O	O	O	O3	O3	O3	O3	O3	O3	O3	O3	O6	O6	O6
HG01860	O3b	2.85187	O	O	O	O	O	O	O	O	O	N	O	O	O	O	O	O	O	O	O	O	O	O	O	O	O	O	O	O	O	O	O	O	O	O	O	H	O3	O3	O3	O3	O3	O3	O6	O3	O3	O6	O25
HG01864	O3b	3.02332	O	O	O	O	IJ	O	IJ	O	O	H	G	H	O												O	O	O	O	O	O	O	O	O	O	O	H	O3	O3	O3	O3	O3	O3	O3	O3	O25	O6	O6
HG02050	O3b	3.58307	O	O	O	O	O	O	O	H	O	H	H	N	O	O	O	O	O	O	O	O	O	O	O	O	O	O	O	O	O	O	O	O	O	O	H	O	O3	O3	O3	O3	O3	O3	O3	O3	O3	O6	O6
HG02058	O3b	3.46371	O	O	O	O	O	O	O	O	O	H	O	N	O	O	O	O	O	O	O	O	O	O	O	O	O	O	O	O	O	O	O	O	O	O	O	H	O3	O3	O3	O3	O3	O3	O3	O3	O3	O6	O3
HG02367	O3b	2.22259	O	O	O	O	O	O	O	O	O	H	O	O	O	O	O	O	O	O	O	O	O	O	O	O	O	O	O	O	O	O	O	O	O	O	O	O	O3	O3	O3	O3	O3	O3	O3	O3	O3	O6	O25
NA18543	O3b	3.31345	O	O	O	O	O	O	O	O	O	O	O	O	O	O	O	O	O	O	O	O	O	O	O	O	O	O	O	O	O	O	O	O	O	H	O	O	O3	O3	O3	O3	O3	O3	O3	O3	O3	O6	O6
NA18546	O3b	3.23379	O	O	O	O	O	O	O	O	O	H	O	O	O	O	O	O	O	O	O	O	O	O	O	Q	O	O	O	O	O	O	O	O	O	O	O	O	O3	O3	O3	O3	O3	O3	O3	O3	O3	O3	H
NA18562	O3b	2.22225	O	O	O	O	O	O	IJ	O	O	N	H	N	O	O	O	O	O	O	O	O	O	O	O	O	O	O	O	O	O	O	O	O	O	O	G	N	O3	O3	O3	O3	O3	O3	O3	O3	O6	O6	O6
NA18572	O3b	1.29838	O	O	O	O	IJ	O	O	O	H	H	H	H	O	O	O	O	O	O	O	O	O	G	O	AB	O	O	O	O	O	O	O	O	O	O	H	E	O3	O3	O3	O3	O3	O3	O3	O6	O6	O25	O6
NA18609	O3b	1.08676	O	O	O	O	O	O	O	O	O	O	N	O	O	O	O	O	O	O	O	O	O	O	O	R	O	O	O	O	O	O	O	O	O	O	O	N	O3	O3	O3	O3	O3	O3	O3	O3	O3	O25	O3
NA18635	O3b	2.68569	O	O	O	O	O	IJ	O	O	O	O	O	G	O	O	O	O	O	O	O	O	O	O	R	N	O	O	O	O	O	O	O	O	O	O	O	O	O3	O3	O3	O3	O3	O3	O3	O3	O6	O25	O6
NA18643	O3b	2.12343	O	O	O	O	O	O	O	O	O	O	O	O	O	O	O	O	O	O	O	O	O	O	O	O	O	O	O	O	O	O	O	O	O	O	O	O	O3	O3	O3	O3	O3	O3	O3	O3	O3	O25	O3
NA18648	O3b	1.79309	O	O	O	O	O	O	O	O	O	O	O	H	O	O	O	O	O	O	O	O	O	O	H	O	O	O	O	O	O	O	O	O	O	O	O	O	O3	O3	O3	O3	O3	O3	O3	O3	O6	O6	O25
NA18959	O3b	4.60809	O	O	O	O	O	IJ	IJ	O	IJ	H	O	AB	O												O	O	O	O	O	O	O	O	O	O	O	H	O3	O3	O3	O3	O3	O3	O3	O6	O3	O25	O1
NA19076	O3b	1.48615	O	O	O	O	O	O	O	O	O	O	O	O	O	O	O	O	O	O	O	O	O	O	AB	H	O	O	O	O	O	O	O	O	O	O	G	O	O3	O3	O3	O3	O3	O3	O3	O3	O6	O3	O25
NA19083	O3b	2.40106	O	O	O	O	O	O	O	O	O	O	O	O	O	O	O	O	O	O	O	O	O	O	O	IJ	O	O	O	O	O	O	O	O	O	O	O	N	O3	O3	O3	O3	O3	O3	O3	O25	O25	O6	O3
HG00622	O3c	3.88858	O	O	O	O	O	IJ	O	O	O	H	H	H	O												O	O	O	O	O	O	O	O	O	O	O	Q	O3	O3	O3	O3	O3	O3	O3	O3	O3	O6	O3
HG00625	O3c	1.28283	O	O	O	O	O	O	IJ	IJ	O	O	H	O	O												O	O	O	O	O	O	O	O	O	O	O	O	O3	O3	O3	O3	O3	O3	O3	O3	O3	O3	O3
NA18621	O3c	3.5475	O	O	O	O	O	O	O	O	O	H	O	O	O	O	O	O	O	O	O	O	O	O	O	R	O	O	O	O	O	O	O	O	O	O	O	H	O3	O3	O3	O3	O3	O3	O3	O3	O6	O6	O1
HG00653	O3f	1.79654	O	O	O	O	O	O	H	O	O	O	O	O	O	O	O	O	O	O	O	O	O	O	O	AB	O	O	O	O	O	O	O	O	O	O	O	O	O3	O3	O3	O3	O3	O3	O3	O3	O3	O6	O6
HG02035	O3f	2.11716	O	O	O	O	O	O	O	O	O	O	G	AB	O	O	O	O	O	O	O	O	O	O	O	O	O	O	O	O	O	O	O	O	O	O	O	G	O3	O3	O3	O3	O3	O3	O3	O3	O6	O6	O3
HG02073	O3f	5.38963	O	O	O	O	O	O	O	O	O	O	O	IJ	O	O	O	O	O	O	O	O	O	O	H	H	O	O	O	O	O	O	O	O	O	LT	R	R	O3	O3	O3	O3	O3	O3	O3	O3	O3	J1	O25
HG01816	O3g	2.02095	O	O	O	O	O	O	O	O	O	O	O	O	O	O	O	O	O	O	O	O	O	O	O	O	O	O	O	O	O	O	O	O	O	O	O	O	O3	O3	O3	O3	O3	O3	O3	O3	O3	O6	O6
HG01861	O3g	2.75071	O	O	O	O	O	O	O	O	O	AB	O	O	O	O	O	O	O	O	O	O	O	O	O	O	O	O	O	O	O	O	O	O	O	O	O	O	O3	O3	O3	O3	O3	O3	O3	O3	O3	O25	O25
HG02023	O3g	2.46506	O	O	O	O	O	O	O	O	N	O	O	Q	O	O	O	O	O	O	O	O	O	O	O	AB	O	O	O	O	O	O	O	O	O	O	O	LT	O3	O3	O3	O3	O3	O3	O3	O3	O3	O6	O6
HG02131	O3g	2.10189	O	O	O	O	O	O	IJ	O	O	G	H	O	O	O	O	O	O	O	O	O	O	O	O	LT	O	O	O	O	O	O	O	O	O	O	O	R	O3	O3	O3	O3	O3	O3	O3	O3	O3	O6	O25
HG02137	O3g	2.09817	O	O	O	O	O	O	O	O	O	O	O	O	O												O	O	O	O	O	O	O	O	O	O	O	O	O3	O3	O3	O3	O3	O3	O3	O3	O3	O6	O3
HG00650	O3h	1.70587	O	O	O	O	O	IJ	O	O	O	O	O	O	O												O	O	O	O	O	O	O	O	O	O	O	O	O3	O3	O3	O3	O3	O3	O3	O3	O3	O3	H
HG00656	O3h	1.88167	O	O	O	O	O	O	O	O	O	O	O	N	O												O	O	O	O	O	O	O	O	O	O	O	O	O3	O3	O3	O3	O3	O3	O3	O3	O3	O3	O6
HG00662	O3h	1.78123	O	O	O	O	O	O	O	O	O	O	O	O	O	O	O	O	O	O	O	O	O	O	O	AB	O	O	O	O	O	O	O	O	O	O	O	AB	O3	O3	O3	O3	O3	O3	O3	O3	O6	O6	R1b
HG00671	O3h	1.98178	O	O	O	O	O	O	O	IJ	O	O	O	O	O												O	O	O	O	O	O	O	O	O	O	O	O	O3	O3	O3	O3	O3	O3	O3	O3	O3	O3	O25
HG00674	O3h	3.58502	O	O	O	O	O	O	O	O	O	O	O	O	O												O	O	O	O	O	O	O	O	O	O	G	O	O3	O3	O3	O3	O3	O3	O3	O3	O6	O3	O3
HG00689	O3h	1.70756	O	O	O	O	O	O	O	O	O	N	O	C	O	O	O	O	O	O	O	O	O	O	O	O	O	O	O	O	O	O	O	O	O	O	O	H	O3	O3	O3	O3	O3	O3	O3	O6	O3	O6	O3
HG00692	O3h	1.8455	O	O	O	O	O	IJ	O	O	O	O	G	O	O	O	O	O	O	O	O	O	O	O	O	R	O	O	O	O	O	O	O	O	O	O	O	H	O3	O3	O3	O3	O3	O3	O3	O3	O3	O6	O6
HG00698	O3h	1.82655	O	O	O	O	O	O	O	O	O	H	O	C	O	O	O	O	O	O	O	O	O	O	O	AB	O	O	O	O	O	O	O	O	O	O	O	O	O3	O3	O3	O3	O3	O3	O3	O3	O3	O25	O6
HG00704	O3h	1.86069	O	O	O	O	O	O	IJ	O	O	N	O	O	O	O	O	O	O	O	O	O	O	O	O	O	O	O	O	O	O	O	O	O	O	O	O	H	O3	O3	O3	O3	O3	O3	O3	O6	O3	O6	O3
HG00556	O3j	2.84729	O	O	O	O	O	O	O	O	O	O	G	O	O												O	O	O	O	O	O	O	O	O	O	O	O	O3	O3	O3	O3	O3	O3	O3	O3	O3	H	O25
HG00631	O3j	3.9398	O	O	O	O	O	O	O	O	O	O	O	O	O	O	O	O	O	O	O	O	O	O	N	E	O	O	O	O	O	O	O	O	O	O	O	O	O3	O3	O3	O3	O3	O3	O3	O3	O6	O6	O6
HG01872	O3j	5.76167	O	O	O	O	O	O	O	O	O	H	H	R	O												O	O	O	O	O	O	O	O	O	O	O	O	O3	O3	O3	O3	O3	O3	O3	O25	O3	O6	O6
HG00530	O5		O												O												O												O25
HG00533	O5	1.80352	O	O	O	O	O	O	O	O	O	O	O	O	O	O	O	O	O	O	O	O	O	O	O	G	O	O	O	O	O	O	O	O	O	O	O	G	O25	O25	O25	O25	O25	O25	O25	O25	O25	O25	O25
NA18561	O5	2.3647	O	O	O	O	O	O	O	O	O	H	G	G	O	O	O	O	O	O	O	O	O	O	O	H	O	O	O	O	O	O	O	O	O	O	O	H	O25	O25	O25	O25	O25	O25	O25	O25	O25	O25	O25
NA18563	O5	2.76629	O	O	O	O	O	O	O	O	O	O	G	O	O												O	O	O	O	O	O	O	O	O	O	O	R	O25	O25	O25	O25	O25	O25	O25	O25	O25	O25	O25
NA18943	O5	2.13233	O	O	O	O	O	O	O	O	O	O	O	Q	O	O	O	O	O	O	O	O	O	O	O	O	O	O	O	O	O	O	O	O	O	O	O	G	O25	O25	O25	O25	O25	O25	O25	O25	O25	O25	O1
NA18953	O5	1.63786	O	O	O	IJ	IJ	O	O	O	O	O	O	O	O	O	O	O	O	O	O	O	O	H	O	H	O	O	O	O	O	O	O	O	O	O	O	IJ	O25	O25	O25	O25	O25	O25	O25	O25	O25	O6	O25
NA18962	O5	2.4638	O	O	O	O	O	O	O	O	O	O	H	O	O	O	O	O	O	O	O	O	O	O	O	O	O	O	O	O	O	O	O	O	O	O	O	H	O25	O25	O25	O25	O25	O25	O25	O25	O25	O25	O25
NA18965	O5	2.07275	O	O	O	O	O	O	O	O	O	O	O	O	O												O	O	O	O	O	O	O	O	O	O	O	G	O25	O25	O25	O25	O25	O25	O25	O25	O25	O25	R1b
NA18977	O5	2.26291	O	O	O	O	O	IJ	O	IJ	O	O	O	O	O	O	O	O	O	O	O	O	O	O	O	O	O	O	O	O	O	O	O	O	O	O	O	H	O25	O25	O25	O25	O25	O25	O25	O25	O25	O25	O25
NA18985	O5	1.81534	O	O	O	O	O	O	O	O	O	O	O	IJ	O												O	O	O	O	O	O	O	O	O	O	O	O	O25	O25	O25	O25	O25	O25	O25	O25	O25	O6	O6
NA18986	O5	4.36037	O	O	O	O	O	IJ	O	O	O	O	H	H	O												O	O	O	O	O	O	O	O	O	O	O	IJ	O25	O25	O25	O25	O25	O25	O25	O25	O25	O25	O6
NA18990	O5	1.83496	O	O	O	O	O	O	O	O	O	O	O	N	O												O	O	O	O	O	O	O	O	O	O	R	O	O25	O25	O25	O25	O25	O25	O25	O25	O25	O25	O25
NA18994	O5	1.78368	O	O	O	O	O	O	O	O	O	O	O	E	O												O	O	O	O	O	O	O	O	O	O	O	H	O25	O25	O25	O25	O25	O25	O25	O25	O25	O25	O25
NA19000	O5	3.4331	O	O	O	O	O	O	IJ	O	O	O	N	O	O	O	O	O	O	O	O	O	O	H	O	C	O	O	O	O	O	O	O	O	O	O	O	O	O25	O25	O25	O25	O25	O25	O25	O25	O25	O25	R1b
NA19005	O5	2.33712	O	O	O	O	O	O	O	IJ	O	O	N	O	O	O	O	O	O	O	O	O	O	O	O	E	O	O	O	O	O	O	O	O	O	O	O	H	O25	O25	O25	O25	O25	O25	O25	O25	O25	O25	R1b
NA19007	O5	1.93974	O	O	O	O	O	IJ	O	O	O	H	O	H	O	O	O	O	O	O	O	O	O	O	O	IJ	O	O	O	O	O	O	O	O	O	O	H	O	O25	O25	O25	O25	O25	O25	O25	O25	O25	O25	O25
NA19060	O5	1.96477	O	O	O	O	O	O	IJ	O	O	H	N	O	O												O	O	O	O	O	O	O	O	O	O	N	G	O25	O25	O25	O25	O25	O25	O25	O25	O25	O1	O25
NA19066	O5	3.49727	O	O	O	O	O	O	IJ	O	O	O	N	O	O	O	O	O	O	O	O	O	O	O	O	H	O	O	O	O	O	O	O	O	O	O	O	O	O25	O25	O25	O25	O25	O25	O25	O25	O25	O25	J2
NA19067	O5	1.73503	O	O	O	O	O	O	O	O	R	O	R	H	O	O	O	O	O	O	O	O	O	O	O	LT	O	O	O	O	O	O	O	O	O	O	O	Q	O25	O25	O25	O25	O25	O25	O25	O25	O25	O25	O6
NA19070	O5	2.25809	O	O	O	O	O	O	O	O	O	O	O	AB	O												O	O	O	O	O	O	O	O	O	O	O	N	O25	O25	O25	O25	O25	O25	O25	O25	O25	O1	O25
NA19075	O5	1.69498	O	O	O	O	O	O	IJ	O	O	O	G	O	O												O	O	O	O	O	O	O	O	O	O	O	R	O25	O25	O25	O25	O25	O25	O25	O25	O25	O6	J2
NA19088	O5	1.88406	O	O	O	O	O	O	O	O	O	O	N	N	O	O	O	O	O	O	O	O	O	O	O	O	O	O	O	O	O	O	O	O	O	O	O	O	O25	O25	O25	O25	O25	O25	O25	O25	O25	O25	O25
HG00403	O6	1.39508	O	O	O	O	O	O	O	H	O	O	IJ	O	O	O	O	O	O	O	O	O	O	O	H	O	O	O	O	O	O	O	O	O	O	O	O	O	O6	O6	O6	O6	O6	O6	O6	O6	O6	O6	O25
HG00421	O6	3.37842	O	O	O	O	O	O	O	O	O	O	H	O	O	O	O	O	O	O	O	O	O	O	O	O	O	O	O	O	O	O	O	O	O	O	O	O	O6	O6	O6	O6	O6	O6	O6	O6	O6	O6	O6
HG00436	O6	1.03596	O	O	O	O	O	IJ	O	O	O	O	H	O	O	O	O	O	O	O	O	O	O	O	O	IJ	O	O	O	O	O	O	O	O	O	H	O	H	O6	O6	O6	O6	O6	O6	O6	O6	O6	O6	O6
HG00445	O6	3.15683	O	O	O	O	O	O	O	O	O	O	H	H	O	O	O	O	O	O	O	O	O	O	O	G	O	O	O	O	O	O	O	O	O	O	O	O	O6	O6	O6	O6	O6	O6	O6	O6	O6	O25	O6
HG00448	O6	3.15173	O	O	O	O	O	O	O	O	O	O	O	O	O	O	O	O	O	O	O	O	O	O	O	H	O	O	O	O	O	O	O	O	O	O	O	H	O6	O6	O6	O6	O6	O6	O6	O6	O6	O6	O6
HG00451	O6	2.71877	O	O	O	O	O	O	O	H	O	O	G	O	O	O	O	O	O	O	O	O	O	O	Q	C	O	O	O	O	O	O	O	O	O	O	H	H	O6	O6	O6	O6	O6	O6	O6	O6	O6	H	O6
HG00463	O6	1.90076	O	O	O	O	O	O	O	O	O	O	C	O	O	O	O	O	O	O	O	O	O	O	O	C	O	O	O	O	O	O	O	O	O	O	O	R	O6	O6	O6	O6	O6	O6	O6	O3	O6	O6	O6
HG00472	O6	3.29116	O	O	O	O	O	O	O	H	O	N	O	N	O	O	O	O	O	O	O	O	O	O	O	Q	O	O	O	O	O	O	O	O	O	H	O	H	O6	O6	O6	O6	O6	O6	O6	O6	O6	O6	O25
HG00475	O6	3.0377	O	O	O	O	O	O	O	O	O	O	O	H	O	O	O	O	O	O	O	O	O	H	O	H	O	O	O	O	O	O	O	O	O	O	O	O	O6	O6	O6	O6	O6	O6	O6	O6	O6	O6	O6
HG00478	O6	2.75999	O	O	O	O	O	O	O	O	O	O	O	O	O	O	O	O	O	O	O	O	O	O	O	G	O	O	O	O	O	O	O	O	O	O	O	H	O6	O6	O6	O6	O6	O6	O6	O6	O6	O6	O25
HG00500	O6	1.7561	O	O	O	O	O	O	O	O	O	O	O	E	O	O	O	O	O	O	O	O	O	O	O	H	O	O	O	O	O	O	O	O	O	O	H	N	O6	O6	O6	O6	O6	O6	O6	O6	O6	O6	O6
HG00536	O6	3.78683	O	O	O	O	O	O	O	O	O	O	O	O	O	O	O	O	O	O	O	O	O	H	N	H	O	O	O	O	O	O	O	O	O	O	O	O	O6	O6	O6	O6	O6	O6	O6	O6	O6	O25	O6
HG00542	O6		O												O												O												O6
HG00607	O6	1.52061	O	O	O	O	O	IJ	O	O	O	G	H	O	O	O	O	O	O	O	O	O	O	H	O	O	O	O	O	O	O	O	O	O	O	O	H	R	O6	O6	O6	O6	O6	O6	O6	O6	O6	O6	O6
HG00610	O6	1.86144	O	O	O	O	O	O	IJ	O	O	O	O	H	O	O	O	O	O	O	O	O	O	O	O	O	O	O	O	O	O	O	O	O	O	O	O	R	O6	O6	O6	O6	O6	O6	O6	O6	O6	O6	O25
HG00613	O6	1.85485	O	O	O	O	O	O	O	O	O	O	H	O	O												O	O	O	O	O	O	O	O	O	O	H	AB	O6	O6	O6	O6	O6	O6	O6	O6	O6	O6	O6
HG00707	O6	1.97013	O	O	O	O	O	O	O	O	O	H	N	O	O												O	O	O	O	O	O	O	O	O	O	O	IJ	O6	O6	O6	O6	O6	O6	O6	O6	O6	O6	O6
HG01596	O6	1.40195	O	O	O	O	O	O	O	O	O	H	H	O	O	O	O	O	O	O	O	O	O	O	O	O	O	O	O	O	O	O	O	O	O	O	O	C	O6	O6	O6	O6	O6	O6	O6	O6	O6	O6	O6
HG02029	O6	2.88902	O	O	O	O	O	O	O	O	O	O	H	O	O	O	O	O	O	O	O	O	O	O	O	Q	O	O	O	O	O	O	O	O	O	O	H	R	O6	O6	O6	O6	O6	O6	O6	O6	O3	O25	O25
HG02047	O6	2.12942	O	O	O	O	O	O	O	O	O	O	AB	H	O												O	O	O	O	O	O	O	O	O	O	H	O	O6	O6	O6	O6	O6	O6	O6	O6	O6	O6	O6
HG02067	O6	2.00636	O	O	O	O	O	O	H	O	O	H	O	O	O	O	O	O	O	O	O	O	O	O	O	IJ	O	O	O	O	O	O	O	O	O	O	H	H	O6	O6	O6	O6	O6	O6	O6	O6	O6	O6	O6
HG02070	O6	5.44884	O	O	O	O	O	O	O	O	O	O	O	O	O	O	O	O	O	O	O	O	O	O	O	LT	O	O	O	O	O	O	O	O	O	O	O	R	O6	O6	O6	O6	O6	O6	O6	O6	O6	O6	O6
HG02128	O6	2.96998	O	O	O	O	O	O	O	O	O	O	N	O	O												O	O	O	O	O	O	O	O	O	O	O	H	O6	O6	O6	O6	O6	O6	O6	O6	O6	O6	O6
HG02392	O6	2.37022	O	O	O	O	O	O	IJ	O	O	H	N	H	O	O	O	O	O	O	O	O	O	O	O	G	O	O	O	O	O	O	O	O	O	O	O	C	O6	O6	O6	O6	O6	O6	O6	O6	O6	O6	O6
NA18544	O6	2.57078	O	O	O	O	O	O	O	O	O	O	O	H	O	O	O	O	O	O	O	O	O	H	O	E	O	O	O	O	O	O	O	O	O	O	O	O	O6	O6	O6	O6	O6	O6	O6	O6	O6	O6	R1b
NA18559	O6	2.59461	O	O	O	O	O	O	O	O	O	O	H	H	O	O	O	O	O	O	O	O	O	O	O	Q	O	O	O	O	O	O	O	O	O	O	O	H	O6	O6	O6	O6	O6	O6	O6	O6	O6	O6	O6
NA18605	O6	3.28111	O	O	O	O	O	O	O	O	O	O	H	H	O												O	O	O	O	O	O	O	O	O	O	H	O	O6	O6	O6	O6	O6	O6	O6	O6	O6	O6	O6
NA18611	O6	1.65642	O	O	O	O	O	O	IJ	O	O	N	O	AB	O												O	O	O	O	O	O	O	O	O	O	O	LT	O6	O6	O6	O6	O6	O6	O6	O6	O6	O6	O6
NA18629	O6	2.15165	O	O	O	O	O	O	O	O	O	N	O	O	O	O	O	O	O	O	O	O	O	O	O	LT	O	O	O	O	O	O	O	O	O	O	O	H	O6	O6	O6	O6	O6	O6	O6	O6	O6	O6	O25
NA18633	O6	3.75109	O	O	O	O	O	O	O	O	O	H	H	O	O												O	O	O	O	O	O	O	O	O	O	O	Q	O6	O6	O6	O6	O6	O6	O6	O6	O6	O6	O6
NA18745	O6	2.1185	O	O	O	O	O	O	O	O	O	N	H	N	O	O	O	O	O	O	O	O	O	O	O	C	O	O	O	O	O	O	O	O	O	O	O	G	O6	O6	O6	O6	O6	O6	O6	O6	O6	O6	O6
NA18982	O6	2.80213	O	O	O	O	O	IJ	O	O	O	H	O	N	O												O	O	O	O	O	O	O	O	O	O	O	H	O6	O6	O6	O6	O6	O6	O6	O6	O6	O6	O6
NA18984	O6	2.68389	O	O	O	O	O	IJ	O	O	H	G	N	H	O	O	O	O	O	O	O	O	O	O	H	O	O	O	O	O	O	O	O	O	O	O	O	H	O6	O6	O6	O6	O6	O6	O6	O6	O6	O6	O6
HG00559	O7	1.72429	O	O	O	O	O	O	O	O	O	O	N	G	O	O	O	O	O	O	O	O	O	O	O	Q	O	O	O	O	O	O	O	O	O	O	O	O	NA
HG02088	O7	2.14603	O	O	O	O	O	O	O	O	O	O	O	O	O	O	O	O	O	O	O	O	O	O	IJ	H	O	O	O	O	O	O	O	O	O	O	O	G	NA
HG03914	Q	2.14867	Q	Q	Q	Q	IJ	IJ	IJ	R	O	Q	H	R	Q	Q	Q	Q	Q	Q	Q	Q	Q	H	Q	Q	Q	Q	Q	Q	Q	Q	Q	Q	Q	Q	Q	R	NA
NA19682	Q1	1.85942	Q	IJ	IJ	IJ	IJ	Q	IJ	H	R	Q	H	IJ	Q	Q	Q	Q	Q	Q	Q	Q	R	R	O	E	Q	Q	Q	Q	Q	Q	Q	Q	Q	R	Q	Q	Q1	Q1	Q1	Q1	Q1	Q1	Q1	Q1	Q1	Q1	R2
NA19732	Q1	1.57534	Q	Q	Q	IJ	IJ	IJ	IJ	H	H	O	H	H	Q	Q	Q	Q	Q	Q	Q	Q	Q	Q	R	Q	Q	Q	Q	Q	Q	Q	Q	Q	Q	Q	Q	C	Q1	Q1	Q1	Q1	Q1	Q1	Q1	Q1	Q1	J2	R1b
NA19786	Q1	1.52184	Q	Q	IJ	IJ	Q	IJ	IJ	H	H	N	H	AB	Q	Q	Q	Q	Q	Q	Q	Q	Q	H	R	AB	Q	Q	Q	Q	Q	Q	Q	Q	Q	Q	Q	IJ	Q1	Q1	Q1	Q1	Q1	Q1	Q1	Q1	Q1	Q1	R2
HG01124	Q1a	4.35037	Q	IJ	Q	IJ	Q	Q	Q	H	Q	O	AB	O	Q	Q	Q	Q	Q	Q	Q	Q	R	R	R	H	Q	Q	Q	Q	Q	Q	Q	Q	Q	Q	Q	G	Q1	Q1	Q1	Q1	Q1	Q1	Q1	Q1	Q1	R1a	R1a
HG01139	Q1a	2.12953	Q	Q	Q	Q	Q	Q	Q	Q	LT	H	O	IJ	Q	Q	Q	Q	Q	Q	Q	Q	R	Q	Q	R	Q	Q	Q	Q	Q	Q	Q	Q	Q	R	Q	Q	Q1	Q1	Q1	Q1	Q1	Q1	Q1	Q1	LT	Q1	Q1
HG01142	Q1a	3.1103	Q	Q	Q	Q	Q	Q	Q	IJ	H	O	H	H	Q	Q	Q	Q	Q	Q	Q	Q	Q	R	Q	Q	Q	Q	Q	Q	Q	Q	Q	Q	Q	Q	Q	R	Q1	Q1	Q1	Q1	Q1	Q1	Q1	Q1	Q1	H	Q1
HG01565	Q1a	1.47732	Q	Q	Q	Q	Q	Q	H	R	Q	H	N	N	Q	Q	Q	Q	Q	Q	Q	Q	Q	H	Q	G	Q	Q	Q	Q	Q	Q	Q	Q	Q	R	Q	H	Q1	Q1	Q1	Q1	Q1	Q1	Q1	Q1	Q1	Q1	O1
HG01892	Q1a	2.39108	Q	IJ	Q	Q	Q	Q	H	H	H	H	N	G	Q	Q	Q	Q	Q	Q	Q	Q	Q	R	Q	H	Q	Q	Q	Q	Q	Q	Q	Q	Q	R	Q	Q	Q1	Q1	Q1	Q1	Q1	Q1	Q1	Q1	Q1	O6	R1a
HG01920	Q1a	2.72907	Q	Q	Q	Q	IJ	Q	H	Q	H	O	O	H	Q	Q	Q	Q	Q	Q	Q	Q	Q	Q	G	R	Q	Q	Q	Q	Q	Q	Q	Q	Q	Q	R	R	Q1	Q1	Q1	Q1	Q1	Q1	Q1	Q1	Q1	Q1	Q1
HG01923	Q1a	2.50516	Q	Q	Q	Q	Q	Q	Q	Q	R	O	AB	Q	Q												Q	Q	Q	Q	Q	Q	Q	Q	Q	Q	R	R	Q1	Q1	Q1	Q1	Q1	Q1	Q1	Q1	Q1	Q1	R1b
HG01926	Q1a	2.8021	Q	IJ	IJ	IJ	IJ	IJ	IJ	H	Q	R	H	AB	Q												Q	Q	Q	Q	Q	Q	Q	Q	Q	Q	Q	H	Q1	Q1	Q1	Q1	Q1	Q1	Q1	Q1	H	O6	R1a
HG01938	Q1a	2.31809	Q	IJ	IJ	IJ	IJ	Q	IJ	H	Q	H	O	O	Q	Q	Q	Q	Q	Q	Q	Q	Q	O	H	C	Q	Q	Q	Q	Q	Q	Q	Q	Q	Q	LT	Q	Q1	Q1	Q1	Q1	Q1	Q1	Q1	Q1	Q1	O25	R1a
HG01950	Q1a	2.27397	Q	Q	IJ	Q	IJ	Q	IJ	H	R	R	O	AB	Q	Q	Q	Q	Q	Q	Q	Q	Q	O	Q	O	Q	Q	Q	Q	Q	Q	Q	Q	R	Q	H	Q	Q1	Q1	Q1	Q1	Q1	Q1	Q1	Q1	Q1	H	Q1
HG01961	Q1a	1.7353	Q	Q	Q	IJ	Q	IJ	Q	Q	R	H	H	H	Q	Q	Q	Q	Q	Q	Q	Q	Q	Q	Q	R	Q	Q	Q	Q	Q	Q	Q	Q	Q	Q	O	Q	Q1	Q1	Q1	Q1	Q1	Q1	Q1	Q1	Q1	O25	R2
HG01967	Q1a	5.08823	Q	Q	Q	Q	Q	H	H	H	H	N	H	N	Q	Q	Q	Q	Q	Q	Q	Q	Q	Q	Q	G	Q	Q	Q	Q	Q	Q	Q	Q	Q	Q	R	R	Q1	Q1	Q1	Q1	Q1	Q1	Q1	Q1	Q1	Q1	G
HG01974	Q1a	5.07856	Q	Q	Q	Q	Q	Q	Q	Q	H	H	G	O	Q	Q	Q	Q	Q	Q	Q	Q	Q	Q	Q	Q	Q	Q	Q	Q	Q	Q	Q	Q	Q	O	R	G	Q1	Q1	Q1	Q1	Q1	Q1	Q1	Q1	Q1	Q1	Q1
HG01977	Q1a	4.27023	Q	Q	Q	Q	Q	IJ	IJ	H	H	R	H	N	Q	Q	Q	Q	Q	Q	Q	Q	Q	O	R	Q	Q	Q	Q	Q	Q	Q	Q	Q	Q	Q	H	E	Q1	Q1	Q1	Q1	Q1	Q1	Q1	Q1	Q1	R1b	R1b
HG01979	Q1a	5.17502	Q	Q	Q	Q	Q	H	Q	Q	H	H	G	LT	Q	Q	Q	Q	Q	Q	Q	Q	Q	R	H	R	Q	Q	Q	Q	Q	Q	Q	Q	Q	Q	Q	C	Q1	Q1	Q1	Q1	Q1	Q1	Q1	Q1	Q1	Q1	R1b
HG02090	Q1a	2.34458	Q	Q	IJ	IJ	IJ	Q	IJ	H	H	H	H	R	Q												Q	Q	Q	Q	Q	Q	Q	Q	Q	R	Q	Q	Q1	Q1	Q1	Q1	Q1	Q1	Q1	Q1	Q1	Q1	Q1
HG02104	Q1a	3.85504	Q	Q	Q	Q	IJ	Q	Q	H	H	H	G	Q	Q	Q	Q	Q	Q	Q	Q	Q	Q	Q	O	Q	Q	Q	Q	Q	Q	Q	Q	Q	Q	Q	H	IJ	Q1	Q1	Q1	Q1	Q1	Q1	Q1	Q1	H	H	H
HG02146	Q1a	2.04023	Q	H	IJ	IJ	Q	Q	Q	H	O	H	H	Q	Q												Q	Q	Q	Q	Q	Q	Q	Q	Q	Q	H	G	Q1	Q1	Q1	Q1	Q1	Q1	Q1	Q1	Q1	Q1	Q1
HG02259	Q1a	2.71048	Q	Q	Q	IJ	IJ	IJ	H	Q	O	H	G	IJ	Q	Q	Q	Q	Q	Q	Q	Q	Q	Q	Q	E	Q	Q	Q	Q	Q	Q	Q	Q	Q	R	Q	G	Q1	Q1	Q1	Q1	Q1	Q1	Q1	Q1	Q1	Q1	R1a
HG02265	Q1a	1.64703	Q	IJ	IJ	IJ	IJ	H	H	R	H	R	N	H	Q	Q	Q	Q	Q	Q	Q	Q	Q	R	LT	R	Q	Q	Q	Q	Q	Q	Q	Q	Q	Q	Q	C	Q1	Q1	Q1	Q1	Q1	Q1	Q1	Q1	Q1	Q1	H
HG02271	Q1a	3.47453	Q	IJ	IJ	IJ	IJ	IJ	IJ	H	O	O	O	O	Q	Q	Q	Q	Q	Q	Q	Q	Q	R	Q	H	Q	Q	Q	Q	Q	Q	Q	Q	Q	Q	Q	H	Q1	Q1	Q1	Q1	Q1	Q1	Q1	Q1	Q1	H	R2
HG02277	Q1a	3.08265	Q	IJ	IJ	IJ	IJ	IJ	IJ	Q	IJ	R	R	H	Q	Q	Q	Q	Q	Q	Q	Q	Q	Q	G	G	Q	Q	Q	Q	Q	Q	Q	Q	Q	Q	R	N	Q1	Q1	Q1	Q1	Q1	Q1	Q1	Q1	Q1	Q1	O6
HG02285	Q1a	3.01549	Q	Q	Q	IJ	Q	Q	Q	O	Q	IJ	H	H	Q												Q	Q	Q	Q	Q	Q	Q	Q	Q	Q	R	Q	Q1	Q1	Q1	Q1	Q1	Q1	Q1	Q1	Q1	Q1	R2
HG02291	Q1a	1.76206	Q	Q	Q	Q	Q	H	Q	H	Q	O	H	Q	Q	Q	Q	Q	Q	Q	Q	Q	Q	H	Q	LT	Q	Q	Q	Q	Q	Q	Q	Q	Q	Q	R	Q	Q1	Q1	Q1	Q1	Q1	Q1	Q1	Q1	Q1	H	Q1
HG02299	Q1a	2.19718	Q	Q	Q	Q	Q	IJ	Q	IJ	H	O	AB	O	Q	Q	Q	Q	Q	Q	Q	R	Q	H	G	LT	Q	Q	Q	Q	Q	Q	Q	Q	Q	H	R	G	Q1	Q1	Q1	Q1	Q1	Q1	Q1	Q1	Q1	Q1	R1b
HG02304	Q1a	3.3658	Q	Q	Q	IJ	Q	Q	Q	H	H	H	H	E	Q	Q	Q	Q	Q	Q	Q	Q	R	Q	Q	R	Q	Q	Q	Q	Q	Q	Q	Q	Q	Q	R	R	Q1	Q1	Q1	Q1	Q1	Q1	Q1	Q1	Q1	Q1	R1a
NA19664	Q1a	2.30993	Q	IJ	IJ	IJ	IJ	IJ	Q	O	H	H	O	N	Q	Q	Q	Q	Q	Q	Q	Q	Q	H	H	O	Q	Q	Q	Q	Q	Q	Q	Q	Q	R	Q	R	Q1	Q1	Q1	Q1	Q1	Q1	Q1	Q1	Q1	O25	O25
NA19729	Q1a	2.04267	Q	Q	Q	Q	Q	Q	Q	Q	Q	Q	O	H	Q												Q	Q	Q	Q	Q	Q	Q	Q	Q	Q	Q	IJ	Q1	Q1	Q1	Q1	Q1	Q1	Q1	Q1	Q1	H	O25
NA19735	Q1a	2.63118	Q	Q	Q	Q	Q	IJ	Q	Q	IJ	O	H	H	Q	Q	Q	Q	Q	Q	Q	Q	Q	H	Q	H	Q	Q	Q	Q	Q	Q	Q	Q	Q	Q	R	Q	Q1	Q1	Q1	Q1	Q1	Q1	Q1	Q1	Q1	Q1	R2
NA19774	Q1a	1.49583	Q	Q	Q	Q	Q	Q	IJ	H	H	R	Q	O	Q	Q	Q	Q	Q	Q	Q	Q	Q	Q	H	LT	Q	Q	Q	Q	Q	Q	Q	Q	Q	Q	Q	H	Q1	Q1	Q1	Q1	Q1	Q1	Q1	Q1	Q1	H	O25
NA19783	Q1a	3.55669	Q	IJ	IJ	IJ	IJ	Q	IJ	IJ	Q	G	R	N	Q	Q	Q	Q	Q	Q	Q	Q	Q	H	R	G	Q	Q	Q	Q	Q	Q	Q	Q	Q	Q	Q	G	Q1	Q1	Q1	Q1	Q1	Q1	Q1	Q1	Q1	R1a	I1
NA19771	Q1b	1.5838	Q	Q	Q	Q	Q	Q	Q	Q	Q	O	R	R	Q												Q	Q	Q	Q	Q	Q	Q	Q	Q	Q	Q	Q	Q1	Q1	Q1	Q1	Q1	Q1	Q1	Q1	Q1	O1	H
NA19795	Q1b	2.76957	Q	Q	IJ	IJ	IJ	IJ	Q	Q	Q	O	O	AB	Q												Q	Q	Q	Q	Q	Q	Q	Q	Q	R	Q	H	Q1	Q1	Q1	Q1	Q1	Q1	Q1	Q1	Q1	R1a	R1b
HG03943	Q1f	4.38037	Q	IJ	IJ	IJ	IJ	Q	Q	Q	H	H	G	G	Q	Q	Q	Q	Q	Q	Q	Q	Q	G	O	H	Q	Q	Q	Q	Q	Q	Q	Q	Q	Q	O	O	Q1	Q1	Q1	Q1	Q1	Q1	Q1	Q1	H	H	R2
HG02696	Q2	4.03144	Q	Q	Q	Q	IJ	R	IJ	H	IJ	H	IJ	O	Q												Q	Q	Q	Q	Q	Q	Q	Q	Q	R	Q	H	NA
HG01944	Q2	3.27574	Q	Q	Q	IJ	IJ	IJ	Q	O	G	H	O	O	Q	Q	Q	Q	Q	Q	Q	Q	Q	R	Q	C	Q	Q	Q	Q	Q	Q	Q	Q	Q	Q	Q	R	NA
HG02116	Q2	2.30021	Q	Q	IJ	IJ	IJ	Q	Q	IJ	IJ	IJ	O	O	Q	Q	Q	Q	Q	Q	Q	Q	Q	R	H	R	Q	Q	Q	Q	Q	Q	Q	Q	Q	Q	O	AB	NA
HG02134	Q2	2.52735	Q	IJ	IJ	IJ	IJ	IJ	IJ	IJ	O	O	O	H	Q	Q	Q	H	Q	Q	Q	Q	Q	H	O	H	Q	Q	Q	Q	Q	Q	Q	Q	Q	Q	R	H	NA
HG03681	Q3	4.22216	Q	IJ	IJ	IJ	IJ	Q	Q	H	H	H	H	H	Q												Q	Q	Q	Q	Q	Q	Q	Q	Q	Q	H	G	NA
HG03652	Q3	3.43381	Q	IJ	IJ	IJ	IJ	IJ	IJ	IJ	IJ	O	H	H	Q	Q	Q	Q	Q	Q	Q	R	Q	Q	R	O	Q	Q	Q	Q	Q	Q	Q	Q	Q	Q	Q	R	NA
HG03864	Q3	5.23607	Q	IJ	IJ	IJ	IJ	Q	IJ	H	O	H	R	H	Q	Q	Q	Q	Q	Q	Q	Q	Q	R	Q	H	Q	Q	Q	Q	Q	Q	Q	Q	Q	R	R	H	NA
HG00109	R1a1	2.46956	R	R	R	R	R	R	R	R	O	R	R	Q	R	R	R	R	R	R	R	R	R	H	R	H	R	R	R	R	R	R	R	R	R	R	H	G	R1a	R1a	R1a	R1a	R1a	R1a	R1a	R1a	R1a	R1b	Q1
HG00151	R1a1	1.62119	R	R	IJ	IJ	R	IJ	R	R	O	H	O	O	R												R	R	R	R	R	R	R	R	R	R	R	N	R1a	R1a	R1a	R1a	R1a	R1a	R1a	R1a	R1a	R1a	R1b
HG00277	R1a1	1.62028	R	IJ	IJ	IJ	IJ	IJ	IJ	H	H	O	O	O	R	R	R	R	R	R	R	R	R	R	LT	O	R	R	R	R	R	R	R	R	R	R	R	H	R1a	R1a	R1a	R1a	R1a	R1a	R1a	R1a	R1a	R1b	R1b
HG00382	R1a1	2.46069	R	IJ	IJ	IJ	IJ	R	IJ	H	H	N	O	O	R	R	R	R	R	R	R	R	R	H	R	H	R	R	R	R	R	R	R	R	R	R	O	H	R1a	R1a	R1a	R1a	R1a	R1a	R1a	R1a	R1a	R1b	R1b
HG00366	R1a1	1.48855	R	IJ	IJ	IJ	IJ	R	IJ	H	H	O	O	O	R												R	R	R	R	R	R	R	R	R	R	O	H	R1a	R1a	R1a	R1a	R1a	R1a	R1a	R1a	R1a	R1a	J2
HG00113	R1a1	3.50442	R	IJ	R	R	R	R	IJ	R	O	H	O	O	R	R	R	R	R	R	R	R	R	R	R	R	R	R	R	R	R	R	R	R	R	R	R	R	R1a	R1a	R1a	R1a	R1a	R1a	R1a	R1a	R1a	O25	O6
HG00114	R1a1	1.59051	R	IJ	IJ	IJ	IJ	R	R	H	O	O	N	O	R												R	R	R	R	R	R	R	R	R	R	R	H	R1a	R1a	R1a	R1a	R1a	R1a	R1a	R1a	R1a	R1a	H
NA11843	R1a1	1.88396	R	R	R	R	IJ	R	R	R	H	H	Q	H	R	R	R	R	R	R	R	R	R	R	Q	R	R	R	R	R	R	R	R	R	R	R	R	N	R1a	R1a	R1a	R1a	R1a	R1a	R1a	R1a	R1a	R1a	R1a
HG01617	R1a2	2.58205	R	R	R	IJ	R	R	R	O	O	O	O	AB	R	R	R	R	R	R	R	R	R	R	C	R	R	R	R	R	R	R	R	R	R	R	R	R	R1a	R1a	R1a	R1a	R1a	R1a	R1a	R1a	R1a	H	R1b
HG01982	R1a2	1.99522	R	R	R	R	R	R	R	H	H	R	R	H	R	R	R	R	R	R	R	R	R	R	R	H	R	R	R	R	R	R	R	R	R	R	R	R	R1a	R1a	R1a	R1a	R1a	R1a	R1a	R1a	R1a	R1a	R1b
HG03585	R1a2	2.01705	R	R	R	R	R	R	R	R	H	G	IJ	H	R	R	R	R	R	R	R	R	R	R	O	H	R	R	R	R	R	R	R	R	R	R	G	Q	R1a	R1a	R1a	R1a	R1a	R1a	R1a	R1a	R1a	R1a	R1a
HG02597	R1a2	1.86032	R	R	R	R	R	R	R	R	R	H	R	N	R	R	R	R	R	R	R	R	R	R	R	R	R	R	R	R	R	R	R	R	R	R	R	H	R1a	R1a	R1a	R1a	R1a	R1a	R1a	R1a	R1a	R1a	R1a
HG02603	R1a2	4.69303	R	IJ	R	IJ	IJ	IJ	H	IJ	R	R	N	G	R												R	R	R	R	R	R	R	R	R	R	R	E	R1a	R1a	R1a	R1a	R1a	R1a	R1a	R1a	R1a	R1a	R1b
HG02699	R1a2	3.58108	R	R	R	R	R	R	O	O	H	N	R	E	R												R	R	R	R	R	R	R	R	R	R	R	Q	R1a	R1a	R1a	R1a	R1a	R1a	R1a	R1a	R1a	R1a	H
HG02736	R1a2	2.75511	R	IJ	IJ	IJ	R	R	IJ	H	O	O	H	N	R	R	R	R	R	R	R	R	R	R	R	R	R	R	R	R	R	R	R	R	R	R	R	R	R1a	R1a	R1a	R1a	R1a	R1a	R1a	R1a	R1a	R1b	H
HG02780	R1a2	2.19538	R	R	R	R	R	R	R	O	R	H	R	N	R	R	R	R	R	R	R	R	R	Q	R	AB	R	R	R	R	R	R	R	R	R	R	R	H	R1a	R1a	R1a	R1a	R1a	R1a	R1a	R1a	R1a	R1b	O6
HG03490	R1a2	2.7038	R	R	R	R	R	R	IJ	O	H	H	O	H	R												R	R	R	R	R	R	R	R	R	R	R	R	R1a	R1a	R1a	R1a	R1a	R1a	R1a	R1a	R1a	R1a	R1a
HG03603	R1a2	2.61015	R	R	R	R	R	R	H	R	O	H	H	N	R												R	R	R	R	R	R	R	R	R	R	R	R	R1a	R1a	R1a	R1a	R1a	R1a	R1a	R1a	R1a	R1a	R2
HG03629	R1a2	2.48438	R	R	R	R	R	IJ	R	H	H	R	N	O	R												R	R	R	R	R	R	R	R	R	R	R	R	R1a	R1a	R1a	R1a	R1a	R1a	R1a	R1a	R1a	R1a	O6
HG03636	R1a2	1.78336	R	R	R	R	R	R	IJ	R	R	O	LT	N	R	R	R	R	R	R	R	R	R	R	R	LT	R	R	R	R	R	R	R	R	R	Q	R	O	R1a	R1a	R1a	R1a	R1a	R1a	R1a	R1a	R1a	R1a	R1a
HG03663	R1a2	3.4354	R	R	R	R	R	IJ	R	R	R	H	R	O	R	R	R	R	R	R	R	R	R	R	R	Q	R	R	R	R	R	R	R	R	R	R	R	N	R1a	R1a	R1a	R1a	R1a	R1a	R1a	R1a	R1a	O6	R1b
HG03685	R1a2	3.90103	R	IJ	IJ	IJ	IJ	IJ	H	H	O	O	O	N	R												R	R	R	R	R	R	R	R	R	R	H	R	R1a	R1a	R1a	R1a	R1a	R1a	R1a	R1a	R1a	R1a	R1b
HG03687	R1a2	3.09729	R	R	R	R	R	Q	IJ	R	H	O	R	Q	R	R	R	R	R	R	R	R	R	R	R	H	R	R	R	R	R	R	R	R	R	R	R	Q	R1a	R1a	R1a	R1a	R1a	R1a	R1a	R1a	R1a	R1a	R1a
HG03694	R1a2	2.29621	R	R	R	R	R	R	R	R	IJ	H	O	O	R	R	R	R	R	R	R	R	R	O	H	R	R	R	R	R	R	R	R	R	R	R	R	Q	R1a	R1a	R1a	R1a	R1a	R1a	R1a	R1a	R1a	R1b	R1a
HG03705	R1a2	1.97559	R	R	R	R	R	R	R	O	R	H	O	N	R	R	R	R	R	R	R	R	R	O	R	H	R	R	R	R	R	R	R	R	R	R	R	R	R1a	R1a	R1a	R1a	R1a	R1a	R1a	R1a	R1a	R1a	R1b
HG03711	R1a2	2.39242	R	R	R	R	R	R	R	H	R	O	H	N	R	R	R	R	R	R	R	R	R	R	Q	R	R	R	R	R	R	R	R	R	R	R	R	C	R1a	R1a	R1a	R1a	R1a	R1a	R1a	R1a	R1a	R1a	O25
HG03713	R1a2	4.37275	R	IJ	IJ	IJ	IJ	IJ	IJ	R	R	G	G	AB	R	R	R	R	R	R	R	R	R	O	R	R	R	R	R	R	R	R	R	R	R	R	R	H	R1a	R1a	R1a	R1a	R1a	R1a	R1a	R1a	R1a	R1b	R1a
HG03715	R1a2	4.12647	R	IJ	IJ	IJ	IJ	R	IJ	R	O	H	H	N	R	R	R	R	R	R	R	R	Q	O	R	Q	R	R	R	R	R	R	R	R	R	R	R	E	R1a	R1a	R1a	R1a	R1a	R1a	R1a	R1a	R1a	R1a	H
HG03720	R1a2	2.01375	R	IJ	R	R	R	IJ	R	R	H	O	R	O	R	R	R	R	R	R	R	R	R	Q	H	H	R	R	R	R	R	R	R	R	R	R	R	H	R1a	R1a	R1a	R1a	R1a	R1a	R1a	R1a	R1a	R1a	R1b
HG03740	R1a2	4.1305	R	IJ	IJ	R	IJ	R	R	H	O	R	O	N	R												R	R	R	R	R	R	R	R	R	R	R	H	R1a	R1a	R1a	R1a	R1a	R1a	R1a	R1a	R1b	R1a	R1b
HG03743	R1a2	3.76362	R	IJ	IJ	R	IJ	IJ	IJ	R	O	R	R	N	R	R	R	R	R	R	R	R	R	R	R	AB	R	R	R	R	R	R	R	R	R	R	R	O	R1a	R1a	R1a	R1a	R1a	R1a	R1a	R1a	R1a	H	R1a
HG03750	R1a2	2.6909	R	IJ	IJ	IJ	R	IJ	R	O	O	H	O	H	R	R	R	R	R	R	R	Q	R	R	R	Q	R	R	R	R	R	R	R	R	R	R	R	LT	R1a	R1a	R1a	R1a	R1a	R1a	R1a	R1a	R1a	R1b	R1b
HG03775	R1a2	4.57229	R	IJ	IJ	IJ	IJ	R	IJ	H	H	O	C	H	R	R	R	R	R	R	R	R	R	O	G	AB	R	R	R	R	R	R	R	R	R	R	R	LT	R1a	R1a	R1a	R1a	R1a	R1a	R1a	R1a	R1a	R1b	AB
HG03803	R1a2	3.95302	R	IJ	IJ	IJ	IJ	IJ	IJ	H	H	H	H	R	R	R	R	R	R	R	R	R	R	R	R	N	R	R	R	R	R	R	R	R	R	R	H	G	R1a	R1a	R1a	R1a	R1a	R1a	R1a	R1a	R1a	R1b	R1b
HG03833	R1a2	1.33457	R	R	R	IJ	IJ	IJ	IJ	R	H	H	H	N	R												R	R	R	R	R	R	R	R	R	R	R	R	R1a	R1a	R1a	R1a	R1a	R1a	R1a	R1a	R1a	O1	H
HG03866	R1a2	2.25699	R	R	R	R	R	R	R	R	H	R	O	N	R	R	R	R	R	R	R	R	R	R	R	E	R	R	R	R	R	R	R	R	R	R	R	R	R1a	R1a	R1a	R1a	R1a	R1a	R1a	R1a	R1a	R2	R2
HG03871	R1a2	2.53278	R	IJ	R	R	R	R	R	R	H	H	H	E	R	R	R	R	R	R	R	R	R	R	H	O	R	R	R	R	R	R	R	R	R	H	R	R	R1a	R1a	R1a	R1a	R1a	R1a	R1a	R1a	R1a	R2	R2
HG03887	R1a2	3.54115	R	IJ	IJ	IJ	IJ	IJ	O	O	G	R	O	H	R	R	R	R	R	R	R	R	R	H	R	H	R	R	R	R	R	R	R	R	R	R	R	C	R1a	R1a	R1a	R1a	R1a	R1a	R1a	R1a	R1a	R2	O6
HG03899	R1a2	3.19694	R	R	R	R	IJ	R	IJ	IJ	H	H	O	O	R												R	R	R	R	R	R	R	R	R	R	R	E	R1a	R1a	R1a	R1a	R1a	R1a	R1a	R1a	R1a	O25	R2
HG03911	R1a2	1.92861	R	R	R	R	R	H	R	H	O	H	O	H	R	R	R	R	R	R	R	R	R	R	LT	R	R	R	R	R	R	R	R	R	R	Q	R	R	R1a	R1a	R1a	R1a	R1a	R1a	R1a	R1a	R1a	R1a	O6
HG03926	R1a2	1.80806	R	IJ	IJ	R	IJ	IJ	R	R	H	O	R	G	R	R	R	R	R	R	R	R	R	R	R	G	R	R	R	R	R	R	R	R	R	R	R	R	R1a	R1a	R1a	R1a	R1a	R1a	R1a	R1a	R1a	R1a	R1a
HG03960	R1a2	2.44239	R	R	R	R	R	R	R	R	O	O	H	O	R												R	R	R	R	R	R	R	R	R	R	R	R	R1a	R1a	R1a	R1a	R1a	R1a	R1a	R1a	R1a	R1b	R1a
HG03963	R1a2	3.42264	R	IJ	IJ	R	IJ	IJ	R	H	R	H	O	IJ	R	R	R	R	R	R	R	R	R	R	R	E	R	R	R	R	R	R	R	R	R	R	IJ	C	R1a	R1a	R1a	R1a	R1a	R1a	R1a	R1a	R1a	R1b	R1a
HG03999	R1a2	2.27873	R	IJ	R	R	IJ	IJ	R	R	H	IJ	H	AB	R	R	R	R	R	R	R	R	R	R	R	H	R	R	R	R	R	R	R	R	R	H	R	Q	R1a	R1a	R1a	R1a	R1a	R1a	R1a	R1a	R1a	R1a	H
HG04017	R1a2	2.35718	R	IJ	R	R	R	IJ	IJ	H	R	H	O	R	R	R	R	R	R	R	R	R	R	R	O	N	R	R	R	R	R	R	R	R	R	R	R	N	R1a	R1a	R1a	R1a	R1a	R1a	R1a	R1a	R1a	R1a	G
HG04019	R1a2	2.42843	R	IJ	R	R	R	R	H	H	R	R	O	H	R	R	R	R	R	R	R	R	R	Q	R	O	R	R	R	R	R	R	R	R	R	Q	R	LT	R1a	R1a	R1a	R1a	R1a	R1a	R1a	R1a	R1a	R1b	R1b
HG04020	R1a2	2.17426	R	R	R	R	R	IJ	R	R	O	R	H	O	R												R	R	R	R	R	R	R	R	R	R	R	R	R1a	R1a	R1a	R1a	R1a	R1a	R1a	R1a	R1a	R1a	O6
HG04023	R1a2	2.20574	R	R	R	R	R	R	H	R	O	R	O	H	R	R	R	R	R	R	R	R	R	R	R	LT	R	R	R	R	R	R	R	R	R	R	R	Q	R1a	R1a	R1a	R1a	R1a	R1a	R1a	R1a	R1a	R1b	O25
HG04039	R1a2	2.32227	R	R	R	R	R	IJ	R	H	R	O	N	R	R	R	R	R	R	R	R	R	R	Q	H	H	R	R	R	R	R	R	R	R	R	R	R	R	R1a	R1a	R1a	R1a	R1a	R1a	R1a	R1a	R1a	R1a	R1b
HG04096	R1a2	2.97666	R	IJ	IJ	IJ	IJ	IJ	IJ	H	H	O	O	O	R												R	R	R	R	R	R	R	R	Q	R	R	N	R1a	R1a	R1a	R1a	R1a	R1a	R1a	R1a	R1a	R1a	O25
HG04098	R1a2	2.91193	R	IJ	IJ	IJ	IJ	IJ	IJ	IJ	R	H	H	H	R	R	R	R	R	R	R	R	R	R	E	N	R	R	R	R	R	R	R	R	R	H	R	H	R1a	R1a	R1a	R1a	R1a	R1a	R1a	R1a	R1a	O25	R1a
HG04131	R1a2	2.00458	R	R	R	R	IJ	H	R	H	H	O	H	H	R	R	R	R	R	R	R	R	R	G	Q	O	R	R	R	R	R	R	R	R	R	R	R	H	R1a	R1a	R1a	R1a	R1a	R1a	R1a	R1a	R1a	R1a	O1
HG04194	R1a2	3.55503	R	R	R	R	R	R	R	H	H	R	R	G	R	R	R	R	R	R	R	R	R	R	R	LT	R	R	R	R	R	R	R	R	R	R	R	R	R1a	R1a	R1a	R1a	R1a	R1a	R1a	R1a	R1a	R1b	R1a
HG04219	R1a2	2.81753	R	R	R	R	R	IJ	R	R	H	H	H	H	R	R	R	R	R	R	R	R	R	R	H	Q	R	R	R	R	R	R	R	R	R	R	R	AB	R1a	R1a	R1a	R1a	R1a	R1a	R1a	R1a	R1a	R1b	R1a
HG04229	R1a2	3.24516	R	R	R	R	R	R	R	R	O	H	H	H	R	R	R	R	R	R	R	R	R	H	R	H	R	R	R	R	R	R	R	R	R	H	H	R	R1a	R1a	R1a	R1a	R1a	R1a	R1a	R1a	R1a	R1a	R1b
NA20539	R1a2	1.89058	R	R	R	R	R	R	IJ	H	H	O	O	E	R	R	R	R	R	R	R	R	R	R	R	R	R	R	R	R	R	R	R	R	R	H	Q	G	R1a	R1a	R1a	R1a	R1a	R1a	R1a	R1a	R1a	R1a	R1b
NA20796	R1a2	1.02389	R	R	R	R	R	R	R	O	R	H	O	H	R	R	R	R	R	R	R	R	R	R	R	R	R	R	R	R	R	R	R	R	R	R	R	H	R1a	R1a	R1a	R1a	R1a	R1a	R1a	R1a	R1a	R1b	R1a
NA20850	R1a2	1.426	R	R	R	R	IJ	R	R	H	H	O	H	N	R	R	R	R	R	R	R	R	R	R	H	R	R	R	R	R	R	R	R	R	R	R	R	R	R1a	R1a	R1a	R1a	R1a	R1a	R1a	R1a	R1a	R1a	R1b
NA20852	R1a2	1.41426	R	R	R	R	R	R	R	R	H	R	G	O	R												R	R	R	R	R	R	R	R	R	R	R	R	R1a	R1a	R1a	R1a	R1a	R1a	R1a	R1a	R1a	R1a	R1b
NA20864	R1a2	3.02823	R	R	R	R	IJ	R	IJ	H	O	H	IJ	O	R	R	R	R	R	R	R	R	R	R	R	R	R	R	R	R	R	R	R	R	R	H	Q	O	R1a	R1a	R1a	R1a	R1a	R1a	R1a	R1a	R1a	H	R1b
NA20890	R1a2	2.43147	R	R	R	R	R	R	IJ	R	R	R	O	E	R	R	R	R	R	R	R	R	R	R	R	AB	R	R	R	R	R	R	R	R	R	R	R	G	R1a	R1a	R1a	R1a	R1a	R1a	R1a	R1a	R1a	R1b	R1b
NA20891	R1a2	3.12746	R	R	R	IJ	IJ	IJ	IJ	O	O	H	O	H	R	R	R	R	R	R	R	R	R	R	R	E	R	R	R	R	R	R	R	R	R	H	Q	H	R1a	R1a	R1a	R1a	R1a	R1a	R1a	R1a	R1a	R1b	R1a
NA20897	R1a2	2.36681	R	R	R	R	IJ	R	R	R	IJ	H	R	R	R	R	R	R	R	R	R	R	R	R	R	R	R	R	R	R	R	R	R	R	R	R	R	R	R1a	R1a	R1a	R1a	R1a	R1a	R1a	R1a	R1a	Q1	O6
NA20898	R1a2	2.62329	R	R	R	R	R	R	R	H	H	H	H	Q	R	R	R	R	R	R	R	R	R	R	R	H	R	R	R	R	R	R	R	R	R	R	Q	R	R1a	R1a	R1a	R1a	R1a	R1a	R1a	R1a	R1a	R1a	R1a
NA20904	R1a2	3.23465	R	R	R	R	R	IJ	R	R	O	O	R	N	R	R	R	R	R	R	R	R	R	R	R	O	R	R	R	R	R	R	R	R	R	R	R	G	R1a	R1a	R1a	R1a	R1a	R1a	R1a	R1a	H	R1b	R1a
NA21092	R1a2	2.17303	R	R	R	R	R	R	R	R	O	IJ	H	AB	R	R	R	R	R	R	R	R	R	R	O	N	R	R	R	R	R	R	R	R	R	R	R	LT	R1a	R1a	R1a	R1a	R1a	R1a	R1a	R1a	R1a	R1a	O6
NA21115	R1a2	1.95543	R	R	R	R	R	R	R	R	R	R	H	H	R	R	R	R	R	R	R	R	R	R	O	R	R	R	R	R	R	R	R	R	R	R	R	R	R1a	R1a	R1a	R1a	R1a	R1a	R1a	R1a	R1a	R1a	R1a
HG02600	R1a2b	4.01428	R	IJ	R	R	R	R	IJ	H	O	H	O	E	R	R	R	R	R	R	R	R	R	H	H	R	R	R	R	R	R	R	R	R	R	R	O	H	R1a	R1a	R1a	R1a	R1a	R1a	R1a	R1a	R1a	H	R1a
HG02648	R1a2b	3.082	R	IJ	R	IJ	IJ	R	IJ	O	O	H	H	E	R	R	R	R	R	R	R	R	R	R	O	G	R	R	R	R	R	R	R	R	R	R	R	R	R1a	R1a	R1a	R1a	R1a	R1a	R1a	R1a	R1a	H	O6
HG02727	R1a2b	3.41247	R	R	R	R	R	R	R	H	H	H	R	Q	R	R	R	R	R	R	R	R	R	R	R	N	R	R	R	R	R	R	R	R	R	R	R	R	R1a	R1a	R1a	R1a	R1a	R1a	R1a	R1a	R1a	R1a	H
HG03234	R1a2b	2.64487	R	R	R	R	R	IJ	R	R	H	O	O	AB	R												R	R	R	R	R	R	R	R	R	R	R	R	R1a	R1a	R1a	R1a	R1a	R1a	R1a	R1a	R1a	R1b	R1a
HG03624	R1a2b	3.29636	R	R	R	IJ	IJ	R	IJ	H	R	R	H	AB	R	R	R	R	R	R	R	R	R	R	H	Q	R	R	R	R	R	R	R	R	R	R	R	IJ	R1a	R1a	R1a	R1a	R1a	R1a	R1a	R1a	R1a	H	R1a
HG03649	R1a2b	3.70781	R	R	R	R	R	R	R	R	O	H	H	O	R	R	R	R	R	R	R	R	R	Q	O	Q	R	R	R	R	R	R	R	R	R	Q	H	LT	R1a	R1a	R1a	R1a	R1a	R1a	R1a	R1a	R1a	R1b	R1b
HG03667	R1a2b	2.91981	R	R	R	R	R	R	IJ	R	O	O	H	N	R	R	R	R	R	R	R	R	R	O	R	AB	R	R	R	R	R	R	R	R	R	R	R	H	R1a	R1a	R1a	R1a	R1a	R1a	R1a	R1a	R1a	R1a	R1b
HG03679	R1a2b	4.4333	R	IJ	IJ	IJ	IJ	IJ	H	H	H	H	IJ	H	R	R	R	R	R	R	R	R	R	O	O	R	R	R	R	R	R	R	R	R	R	R	R	C	R1a	R1a	R1a	R1a	R1a	R1a	R1a	R1a	R1a	H	R1b
HG03744	R1a2b	2.59422	R	R	R	R	R	R	H	H	R	H	H	E	R	R	R	R	R	R	R	R	R	R	R	LT	R	R	R	R	R	R	R	R	R	R	R	C	R1a	R1a	R1a	R1a	R1a	R1a	R1a	R1a	R1a	H	Q1
HG03779	R1a2b	2.71373	R	IJ	R	R	R	R	H	H	O	O	H	O	R	R	R	R	R	R	R	R	R	R	C	O	R	R	R	R	R	R	R	R	R	Q	R	H	R1a	R1a	R1a	R1a	R1a	R1a	R1a	R1a	R1a	R1b	R1a
HG03896	R1a2b	4.46816	R	IJ	IJ	IJ	IJ	IJ	IJ	H	R	R	O	O	R	R	R	R	R	R	R	R	R	H	R	H	R	R	R	R	R	R	R	R	R	R	R	R	R1a	R1a	R1a	R1a	R1a	R1a	R1a	R1a	R1a	R1a	R1b
HG03902	R1a2b	2.02852	R	R	R	R	R	R	R	H	O	H	H	AB	R	R	R	R	R	R	R	R	R	R	R	H	R	R	R	R	R	R	R	R	R	R	R	H	R1a	R1a	R1a	R1a	R1a	R1a	R1a	R1a	R1a	R1a	R1a
NA20846	R1a2b	1.74246	R	R	R	R	IJ	R	IJ	R	O	O	O	H	R	R	R	R	R	R	R	R	R	R	R	R	R	R	R	R	R	R	R	R	R	R	R	R	R1a	R1a	R1a	R1a	R1a	R1a	R1a	R1a	R1a	R1b	H
NA21095	R1a2b	3.78621	R	IJ	IJ	IJ	IJ	R	IJ	H	H	O	G	Q	R	R	R	R	R	R	R	R	R	H	H	IJ	R	R	R	R	R	R	R	R	R	R	H	R	R1a	R1a	R1a	R1a	R1a	R1a	R1a	R1a	R1a	R1b	O25
NA21098	R1a2b	1.87714	R	R	R	R	R	IJ	IJ	R	H	R	N	N	R	R	R	R	R	R	R	R	R	R	R	E	R	R	R	R	R	R	R	R	R	R	Q	IJ	R1a	R1a	R1a	R1a	R1a	R1a	R1a	R1a	R1a	R1a	O1
NA21104	R1a2b	2.7473	R	R	R	R	R	H	IJ	R	H	H	IJ	O	R	R	R	R	R	R	R	R	R	R	H	R	R	R	R	R	R	R	R	R	R	R	R	R	R1a	R1a	R1a	R1a	R1a	R1a	R1a	R1a	R1a	R1a	O25
NA21114	R1a2b	2.31388	R	R	R	R	R	IJ	IJ	R	H	R	H	H	R	R	R	R	R	R	R	R	R	R	R	R	R	R	R	R	R	R	R	R	R	R	R	H	R1a	R1a	R1a	R1a	R1a	R1a	R1a	R1a	R1a	H	R1a
NA21129	R1a2b	3.51732	R	R	R	IJ	R	R	R	R	R	H	H	N	R	R	R	R	R	R	R	R	R	R	R	H	R	R	R	R	R	R	R	R	R	R	E	Q	R1a	R1a	R1a	R1a	R1a	R1a	R1a	R1a	H	R1a	R1a
NA12155	R1a3	5.16222	R	IJ	IJ	IJ	R	IJ	R	H	H	H	G	O	R												R	R	R	R	R	R	R	R	R	H	O	R	R1a	R1a	R1a	R1a	R1a	R1a	R1a	R1a	R1a	R1b	R1b
HG00148	R1b	3.59132	R	IJ	R	IJ	R	R	IJ	O	H	R	H	H	R	R	R	R	R	R	R	R	R	IJ	Q	R	R	R	R	R	R	R	R	R	R	R	R	O	R1b	R1b	R1b	R1b	R1b	R1b	R1b	R1b	R1b	R1b	R1b
HG01082	R1b	1.26283	R	IJ	IJ	IJ	IJ	R	R	O	O	O	R	R	R	R	R	R	R	R	R	R	R	R	Q	R	R	R	R	R	R	R	R	R	R	R	R	C	R1b	R1b	R1b	R1b	R1b	R1b	R1b	R1b	R1b	R1b	R1b
HG01389	R1b	1.85859	R	IJ	IJ	IJ	IJ	IJ	IJ	H	H	IJ	R	N	R	R	R	R	R	R	R	R	R	R	R	R	R	R	R	R	R	R	R	R	R	R	R	R	R1b	R1b	R1b	R1b	R1b	R1b	R1b	R1b	R1b	R1b	R1b
HG01682	R1b	2.11607	R	IJ	R	R	R	R	R	H	R	R	H	N	R	R	R	R	R	R	R	R	R	R	R	R	R	R	R	R	R	R	R	R	R	R	R	Q	R1b	R1b	R1b	R1b	R1b	R1b	R1b	R1b	R1b	R1b	R1b
HG02008	R1b	2.92608	R	IJ	R	IJ	IJ	R	R	R	R	R	H	R	R	R	R	R	R	R	R	R	R	Q	R	N	R	R	R	R	R	R	R	R	R	R	O	H	R1b	R1b	R1b	R1b	R1b	R1b	R1b	R1b	R1b	R1b	H
NA20755	R1b	2.65869	R	R	R	R	R	R	R	R	R	H	O	O	R												R	R	R	R	R	R	R	R	R	R	O	H	R1b	R1b	R1b	R1b	R1b	R1b	R1b	R1b	R1b	R1b	R1b
NA20783	R1b	2.31844	R	R	R	R	R	R	R	H	R	O	O	O	R	R	R	R	R	R	R	R	R	R	R	G	R	R	R	R	R	R	R	R	R	O	R	IJ	R1b	R1b	R1b	R1b	R1b	R1b	R1b	R1b	R1b	R1b	R1b
HG00129	R1b1	2.76469	R	IJ	R	IJ	IJ	R	R	IJ	O	H	H	O	R	R	R	R	R	R	R	R	R	O	R	C	R	R	R	R	R	R	R	R	R	R	R	C	R1b	R1b	R1b	R1b	R1b	R1b	R1b	R1b	R1b	R1b	R1b
HG00142	R1b1	1.61391	R	IJ	IJ	IJ	IJ	R	H	H	H	R	G	O	R	R	R	R	R	R	R	R	R	R	R	H	R	R	R	R	R	R	R	R	R	R	R	H	R1b	R1b	R1b	R1b	R1b	R1b	R1b	R1b	R1b	R1b	R1b
HG00145	R1b1	2.40631	R	R	R	R	R	IJ	R	R	R	O	R	R	R	R	R	R	R	R	R	R	R	H	R	O	R	R	R	R	R	R	R	R	R	LT	R	LT	R1b	R1b	R1b	R1b	R1b	R1b	R1b	R1b	R1b	R1b	R1b
HG00244	R1b1	2.4605	R	R	R	R	IJ	R	IJ	R	O	N	H	H	R	R	R	R	R	R	R	R	R	R	R	R	R	R	R	R	R	R	R	R	R	R	R	O	R1b	R1b	R1b	R1b	R1b	R1b	R1b	R1b	R1b	R1b	R1b
HG00736	R1b1	2.28654	R	IJ	IJ	IJ	IJ	IJ	IJ	H	O	O	O	H	R	R	R	R	R	R	R	R	R	O	R	AB	R	R	R	R	R	R	R	R	R	R	R	H	R1b	R1b	R1b	R1b	R1b	R1b	R1b	R1b	R1b	R1b	J2
HG01060	R1b1	2.52932	R	IJ	IJ	IJ	R	R	R	IJ	R	G	E	O	R	R	R	R	R	R	R	R	R	R	R	E	R	R	R	R	R	R	R	R	R	R	R	O	R1b	R1b	R1b	R1b	R1b	R1b	R1b	R1b	R1b	R1b	R1b
HG01356	R1b1	1.7973	R	R	R	R	R	R	R	R	R	G	N	E	R	R	R	R	R	R	R	R	R	R	O	Q	R	R	R	R	R	R	R	R	R	R	R	Q	R1b	R1b	R1b	R1b	R1b	R1b	R1b	R1b	R1b	R1b	R1b
HG01383	R1b1	1.83967	R	R	R	R	R	R	R	R	O	R	R	H	R	R	R	R	R	R	R	R	R	R	R	H	R	R	R	R	R	R	R	R	R	R	R	AB	R1b	R1b	R1b	R1b	R1b	R1b	R1b	R1b	R1b	R1b	R1b
HG01536	R1b1	2.79662	R	IJ	R	R	IJ	R	IJ	H	O	R	O	R	R	R	R	R	R	R	R	R	R	R	O	H	R	R	R	R	R	R	R	R	R	R	R	R	R1b	R1b	R1b	R1b	R1b	R1b	R1b	R1b	R1b	R1b	R1b
HG01625	R1b1	2.44417	R	R	R	R	R	H	R	R	R	H	H	O	R												R	R	R	R	R	R	R	R	R	R	O	G	R1b	R1b	R1b	R1b	R1b	R1b	R1b	R1b	R1b	R1b	R1b
HG01767	R1b1	3.10885	R	R	R	R	R	R	IJ	R	O	R	R	N	R	R	R	R	R	R	R	R	R	R	R	H	R	R	R	R	R	R	R	R	R	R	R	Q	R1b	R1b	R1b	R1b	R1b	R1b	R1b	R1b	R1b	R1b	R1b
HG01777	R1b1	4.10097	R	R	R	R	R	R	R	R	R	G	R	H	R	R	R	R	R	R	R	R	R	R	O	C	R	R	R	R	R	R	R	R	R	R	R	H	R1b	R1b	R1b	R1b	R1b	R1b	R1b	R1b	R1b	R1b	R1b
HG01941	R1b1	2.35009	R	R	R	R	R	R	R	R	H	H	O	H	R	R	R	R	R	R	R	R	R	R	R	R	R	R	R	R	R	R	R	R	R	R	R	H	R1b	R1b	R1b	R1b	R1b	R1b	R1b	R1b	R1b	R1b	R1b
HG02219	R1b1	2.77942	R	R	R	R	R	IJ	IJ	H	H	G	R	N	R	R	R	R	R	R	R	R	R	Q	R	R	R	R	R	R	R	R	R	R	R	R	R	R	R1b	R1b	R1b	R1b	R1b	R1b	R1b	R1b	R1b	R1b	R1b
HG02231	R1b1	1.62084	R	R	IJ	IJ	IJ	R	IJ	R	H	H	O	O	R	R	R	R	R	R	R	R	R	R	R	R	R	R	R	R	R	R	R	R	R	H	R	R	R1b	R1b	R1b	R1b	R1b	R1b	R1b	R1b	R1b	R1b	R1b
HG02262	R1b1	3.2367	R	R	R	R	R	IJ	R	R	R	R	O	O	R	R	R	R	R	R	R	R	R	R	R	C	R	R	R	R	R	R	R	R	R	R	R	H	R1b	R1b	R1b	R1b	R1b	R1b	R1b	R1b	R1b	R1b	R1b
NA07347	R1b1	4.51396	R	IJ	IJ	IJ	IJ	R	IJ	R	R	H	O	O	R	R	R	R	R	R	R	R	R	R	Q	G	R	R	R	R	R	R	R	R	R	R	H	Q	R1b	R1b	R1b	R1b	R1b	R1b	R1b	R1b	R1b	R1b	H
NA07357	R1b1	2.27346	R	R	R	R	R	R	Q	H	R	R	O	O	R	R	R	R	R	R	R	R	R	O	R	H	R	R	R	R	R	R	R	R	R	R	R	R	R1b	R1b	R1b	R1b	R1b	R1b	R1b	R1b	R1b	R1b	R1b
NA11994	R1b1	5.6488	R	R	R	R	IJ	R	IJ	O	R	H	O	R	R	R	R	R	R	R	R	R	H	G	G	G	R	R	R	R	R	R	R	R	R	R	R	R	R1b	R1b	R1b	R1b	R1b	R1b	R1b	R1b	R1b	R1b	R1b
NA12005	R1b1	5.03341	R	IJ	IJ	IJ	IJ	R	IJ	H	R	H	R	IJ	R	R	R	R	R	R	R	R	R	R	R	R	R	R	R	R	R	R	R	R	R	O	Q	AB	R1b	R1b	R1b	R1b	R1b	R1b	R1b	R1b	R1b	R1b	R1b
NA12144	R1b1	3.68318	R	R	R	R	R	R	R	R	O	R	R	R	R	R	R	R	R	R	R	R	R	R	O	C	R	R	R	R	R	R	R	R	R	R	R	Q	R1b	R1b	R1b	R1b	R1b	R1b	R1b	R1b	R1b	R1b	R2
NA12342	R1b1	6.10665	R	IJ	IJ	IJ	R	IJ	R	R	O	R	R	O	R												R	R	R	R	R	R	R	R	R	R	O	R	R1b	R1b	R1b	R1b	R1b	R1b	R1b	R1b	R1b	R1b	R1b
NA12829	R1b1	2.72785	R	IJ	R	R	R	R	R	R	H	N	O	H	R												R	R	R	R	R	R	R	R	R	R	R	R	R1b	R1b	R1b	R1b	R1b	R1b	R1b	R1b	H	R1b	R1b
NA19649	R1b1	2.87718	R	IJ	IJ	R	R	R	R	R	H	H	IJ	H	R	R	R	R	R	R	R	R	R	O	R	R	R	R	R	R	R	R	R	R	R	R	G	R	R1b	R1b	R1b	R1b	R1b	R1b	R1b	R1b	R1b	R1b	R1b
NA19652	R1b1	1.80159	R	R	R	R	R	IJ	IJ	IJ	H	R	O	R	R												R	R	R	R	R	R	R	R	R	R	R	R	R1b	R1b	R1b	R1b	R1b	R1b	R1b	R1b	R1b	R1b	R1b
NA19661	R1b1	3.23645	R	IJ	IJ	IJ	IJ	R	IJ	H	O	R	G	O	R												R	R	R	R	R	R	R	R	R	R	R	O	R1b	R1b	R1b	R1b	R1b	R1b	R1b	R1b	R1b	R1b	R1b
NA19679	R1b1	2.32208	R	IJ	R	IJ	R	R	R	IJ	R	R	G	O	R	R	R	R	R	R	R	R	R	R	G	H	R	R	R	R	R	R	R	R	R	R	H	Q	R1b	R1b	R1b	R1b	R1b	R1b	R1b	R1b	R1b	R1b	R1b
NA19685	R1b1	2.76735	R	R	R	R	R	R	IJ	R	O	O	R	H	R	R	R	R	R	R	R	R	R	O	R	AB	R	R	R	R	R	R	R	R	R	O	G	IJ	R1b	R1b	R1b	R1b	R1b	R1b	R1b	R1b	R1b	R1b	R1b
NA19720	R1b1	3.70217	R	IJ	R	R	R	IJ	IJ	O	H	R	O	H	R	R	R	R	R	R	R	R	R	H	R	R	R	R	R	R	R	R	R	R	R	R	R	C	R1b	R1b	R1b	R1b	R1b	R1b	R1b	R1b	R1b	R1b	R1b
NA20509	R1b1	2.46609	R	R	R	R	IJ	IJ	R	R	H	H	H	O	R	R	R	R	R	R	R	R	R	R	G	E	R	R	R	R	R	R	R	R	R	R	R	H	R1b	R1b	R1b	R1b	R1b	R1b	R1b	R1b	R1b	R1b	R1b
NA20512	R1b1	2.8676	R	R	R	R	R	R	R	H	H	R	G	O	R	R	R	R	R	R	R	R	R	R	R	O	R	R	R	R	R	R	R	R	R	Q	H	H	R1b	R1b	R1b	R1b	R1b	R1b	R1b	R1b	R1b	R1b	R1b
NA20515	R1b1	2.20387	R	R	R	R	R	R	R	R	H	R	H	E	R	R	R	R	R	R	R	R	R	H	R	E	R	R	R	R	R	R	R	R	R	R	O	Q	R1b	R1b	R1b	R1b	R1b	R1b	R1b	R1b	R1b	R1b	R1b
NA20538	R1b1	2.56208	R	R	R	R	R	R	IJ	R	R	O	H	H	R	R	R	R	R	R	R	R	R	R	O	IJ	R	R	R	R	R	R	R	R	R	R	R	R	R1b	R1b	R1b	R1b	R1b	R1b	R1b	R1b	R1b	R1b	R1b
NA20581	R1b1	2.74648	R	IJ	R	R	R	R	R	H	O	R	O	H	R	R	R	R	R	R	R	R	R	R	R	LT	R	R	R	R	R	R	R	R	R	R	AB	R	R1b	R1b	R1b	R1b	R1b	R1b	R1b	R1b	R1b	R1b	R1b
NA20754	R1b1	1.27507	R	R	R	R	R	R	R	O	O	O	O	E	R												R	R	R	R	R	R	R	R	R	O	R	R	R1b	R1b	R1b	R1b	R1b	R1b	R1b	R1b	R1b	R1b	O25
NA20759	R1b1	2.8712	R	IJ	R	IJ	R	IJ	R	R	R	Q	O	H	R	R	R	R	R	R	R	R	R	R	R	IJ	R	R	R	R	R	R	R	R	R	R	H	R	R1b	R1b	R1b	R1b	R1b	R1b	R1b	R1b	R1b	R1b	R1b
NA20792	R1b1	1.03763	R	IJ	IJ	R	R	R	R	R	O	O	O	N	R												R	R	R	R	R	R	R	R	R	R	R	R	R1b	R1b	R1b	R1b	R1b	R1b	R1b	R1b	R1b	R1b	R1b
NA20798	R1b1	1.92806	R	R	R	R	R	R	R	O	H	O	O	C	R	R	R	R	R	R	R	R	R	R	R	H	R	R	R	R	R	R	R	R	R	R	R	G	R1b	R1b	R1b	R1b	R1b	R1b	R1b	R1b	R1b	R1b	R1b
NA20803	R1b1	2.07511	R	R	R	R	R	R	R	R	R	O	O	O	R	R	R	R	R	R	R	R	R	O	R	E	R	R	R	R	R	R	R	R	R	R	R	R	R1b	R1b	R1b	R1b	R1b	R1b	R1b	R1b	R1b	R1a	R1b
NA20806	R1b1	2.61219	R	R	R	R	IJ	R	IJ	R	H	O	O	N	R	R	R	R	R	R	R	R	Q	R	R	R	R	R	R	R	R	R	R	R	R	Q	R	E	R1b	R1b	R1b	R1b	R1b	R1b	R1b	R1b	R1b	R1b	R1b
NA20810	R1b1	2.6263	R	R	R	R	R	R	IJ	R	R	N	H	H	R												R	R	R	R	R	R	R	R	R	Q	R	LT	R1b	R1b	R1b	R1b	R1b	R1b	R1b	R1b	R1b	R1b	R1b
NA20812	R1b1	2.15424	R	R	R	R	R	IJ	R	R	H	O	R	E	R	R	R	R	R	R	R	R	R	R	R	O	R	R	R	R	R	R	R	R	R	R	R	R	R1b	R1b	R1b	R1b	R1b	R1b	R1b	R1b	R1b	R1b	R1b
NA20814	R1b1	2.04757	R	R	R	R	R	R	IJ	H	O	H	H	H	R												R	R	R	R	R	R	R	R	R	O	R	LT	R1b	R1b	R1b	R1b	R1b	R1b	R1b	R1b	R1b	R1b	Q1
HG01277	R1b11	3.09471	R	IJ	R	R	IJ	R	R	R	H	O	R	O	R	R	R	R	R	R	R	R	R	R	R	H	R	R	R	R	R	R	R	R	R	R	R	R	R1b	R1b	R1b	R1b	R1b	R1b	R1b	R1b	R1b	R1b	R1b
HG01515	R1b11	1.53755	R	R	R	R	R	R	R	R	IJ	R	N	N	R	R	R	R	R	R	R	R	R	R	R	Q	R	R	R	R	R	R	R	R	R	Q	R	R	R1b	R1b	R1b	R1b	R1b	R1b	R1b	R1b	R1b	R1b	R1b
NA18645	R1b11	2.63355	R	R	R	R	IJ	R	IJ	H	O	O	H	O	R	R	R	R	R	R	R	R	R	R	Q	R	R	R	R	R	R	R	R	R	R	R	R	R	R1b	R1b	R1b	R1b	R1b	R1b	R1b	R1b	R1b	R1b	O25
NA20532	R1b11	2.17201	R	R	R	R	R	R	R	R	R	R	R	O	R	R	R	R	R	R	R	R	R	LT	R	H	R	R	R	R	R	R	R	R	R	R	R	R	R1b	R1b	R1b	R1b	R1b	R1b	R1b	R1b	R1b	R1b	R1b
NA20866	R1b11	2.11436	R	IJ	R	R	R	R	R	Q	R	H	O	O	R	R	R	R	R	R	R	R	R	R	R	R	R	R	R	R	R	R	R	R	R	H	R	R	R1b	R1b	R1b	R1b	R1b	R1b	R1b	R1b	R1b	R1b	R1b
HG01947	R1b14	2.8308	R	R	R	IJ	IJ	IJ	IJ	R	O	N	H	R	R	R	R	R	R	R	R	R	R	R	R	R	R	R	R	R	R	R	R	R	R	R	R	H	R1b	R1b	R1b	R1b	R1b	R1b	R1b	R1b	R1b	R1b	G
HG01066	R1b17	1.96805	R	IJ	IJ	IJ	IJ	IJ	IJ	R	H	H	H	G	R												R	R	R	R	R	R	R	R	R	R	O	R	R1b	R1b	R1b	R1b	R1b	R1b	R1b	R1b	R1b	R1b	Q1
NA20785	R1b17	2.39565	R	R	R	R	R	R	R	R	R	H	R	R	R	R	R	R	R	R	R	R	R	R	Q	R	R	R	R	R	R	R	R	R	R	R	H	R	R1b	R1b	R1b	R1b	R1b	R1b	R1b	R1b	R1b	R1b	R1b
HG00640	R1b19	1.94136	R	Q	R	R	R	R	H	Q	H	R	R	R	R												R	R	R	R	R	R	R	R	R	R	G	AB	R1b	H	H	LT	H	H	H	LT	H	R1a	R2
HG00096	R1b2	1.74939	R	R	R	R	R	IJ	R	R	R	R	O	O	R	R	R	R	R	R	R	R	R	H	R	R	R	R	R	R	R	R	R	R	R	R	G	LT	R1b	R1b	R1b	R1b	R1b	R1b	R1b	R1b	R1b	R1b	R1b
HG00103	R1b2	1.98427	R	R	R	R	R	H	R	IJ	R	O	H	H	R	R	R	R	R	R	R	R	R	R	Q	G	R	R	R	R	R	R	R	R	R	R	H	Q	R1b	R1b	R1b	R1b	R1b	R1b	R1b	R1b	R1b	R1b	R1b
HG00105	R1b2	2.72518	R	IJ	R	R	R	R	R	R	R	H	N	O	R	R	R	R	R	R	R	R	R	R	R	G	R	R	R	R	R	R	R	R	R	R	R	N	R1b	R1b	R1b	R1b	R1b	R1b	R1b	R1b	R1b	R1b	H
HG00115	R1b2	3.19109	R	R	R	R	R	IJ	R	H	O	N	H	N	R	R	R	R	R	R	R	R	R	R	R	R	R	R	R	R	R	R	R	R	R	R	Q	R	R1b	R1b	R1b	R1b	R1b	R1b	R1b	R1b	R1b	R1b	R1b
HG00116	R1b2		R												R												R												R1b
HG00119	R1b2	1.7831	R	R	R	R	R	R	R	H	R	H	Q	E	R	R	R	R	R	R	R	R	R	R	R	R	R	R	R	R	R	R	R	R	R	R	Q	IJ	R1b	R1b	R1b	R1b	R1b	R1b	R1b	R1b	R1b	R1b	R1b
HG00242	R1b2	1.62646	R	R	R	R	R	IJ	R	R	O	R	O	O	R												R	R	R	R	R	R	R	R	R	R	R	Q	R1b	R1b	R1b	R1b	R1b	R1b	R1b	R1b	R1b	R1b	R1b
HG00243	R1b2	2.84611	R	R	R	R	R	R	R	R	H	O	R	E	R	R	R	R	R	R	R	R	R	R	R	Q	R	R	R	R	R	R	R	R	R	R	R	Q	R1b	R1b	R1b	R1b	R1b	R1b	R1b	R1b	R1b	R1b	R1b
HG00246	R1b2		R												R												R												R1b
HG01079	R1b2	2.43429	R	IJ	IJ	IJ	IJ	R	IJ	O	R	O	H	O	R	R	R	R	R	R	R	R	R	R	H	O	R	R	R	R	R	R	R	R	R	R	Q	Q	R1b	R1b	R1b	R1b	R1b	R1b	R1b	R1b	R1b	R1b	R1b
HG01136	R1b2	5.92915	R	IJ	IJ	IJ	R	R	H	R	O	O	H	O	R												R	R	R	R	R	R	R	R	R	R	H	R	R1b	R1b	R1b	R1b	R1b	R1b	R1b	R1b	R1b	R1b	R1b
HG01405	R1b2	3.17828	R	R	R	R	R	IJ	R	R	R	O	G	C	R	R	R	R	R	R	R	R	R	R	Q	O	R	R	R	R	R	R	R	R	R	R	G	R	R1b	R1b	R1b	R1b	R1b	R1b	R1b	R1b	R1b	R1b	R1b
HG01500	R1b2	1.46657	R	R	R	R	R	R	R	R	R	O	O	R	R	R	R	R	R	R	R	R	R	H	R	H	R	R	R	R	R	R	R	R	R	R	R	AB	R1b	R1b	R1b	R1b	R1b	R1b	R1b	R1b	R1b	R1b	R1b
HG01503	R1b2	1.38746	R	R	R	IJ	IJ	IJ	IJ	H	O	G	O	AB	R	R	R	R	R	R	R	R	R	R	O	E	R	R	R	R	R	R	R	R	R	R	R	C	R1b	R1b	R1b	R1b	R1b	R1b	R1b	R1b	R1b	R1b	Q1
HG01675	R1b2	2.4571	R	IJ	R	R	R	R	R	R	R	H	R	H	R	R	R	R	R	R	R	R	R	R	R	R	R	R	R	R	R	R	R	R	R	R	R	Q	R1b	R1b	R1b	R1b	R1b	R1b	R1b	R1b	R1b	R1b	R1b
HG01953	R1b2	4.87727	R	IJ	R	R	R	R	R	O	R	R	H	H	R	R	R	R	R	R	R	R	R	O	H	G	R	R	R	R	R	R	R	R	R	R	R	R	R1b	R1b	R1b	R1b	R1b	R1b	R1b	R1b	R1b	R1b	R1b
HG02014	R1b2	4.66335	R	R	R	R	R	R	R	H	R	R	R	R	R	R	R	R	R	R	R	R	R	R	R	R	R	R	R	R	R	R	R	R	R	R	R	H	R1b	R1b	R1b	R1b	R1b	R1b	R1b	R1b	R1b	R1b	O1
HG02051	R1b2	2.21971	R	R	R	R	R	R	R	R	R	R	G	H	R	R	R	R	R	R	R	R	R	R	H	H	R	R	R	R	R	R	R	R	R	R	R	H	R1b	R1b	R1b	R1b	R1b	R1b	R1b	R1b	R1b	R1b	R1b
HG02501	R1b2	1.84649	R	R	R	R	R	R	R	R	O	G	H	O	R												R	R	R	R	R	R	R	R	R	R	R	O	R1b	R1b	R1b	R1b	R1b	R1b	R1b	R1b	R1b	R1b	R1b
NA06984	R1b2	2.56004	R	IJ	IJ	IJ	IJ	IJ	R	R	IJ	H	H	R	R	R	R	R	R	R	R	R	R	O	R	R	R	R	R	R	R	R	R	R	R	R	O	LT	R1b	R1b	R1b	R1b	R1b	R1b	R1b	R1b	R1b	R1b	R1b
NA10851	R1b2	2.01553	R	R	R	R	R	IJ	R	H	R	O	C	H	R												R	R	R	R	R	R	R	R	R	R	R	H	R1b	R1b	R1b	R1b	R1b	R1b	R1b	R1b	R1b	R1b	R1b
NA11831	R1b2	2.11718	R	IJ	IJ	IJ	R	IJ	R	R	IJ	G	R	N	R	R	R	R	R	R	R	R	R	Q	R	R	R	R	R	R	R	R	R	R	R	R	R	AB	R1b	R1b	R1b	R1b	R1b	R1b	R1b	R1b	R1b	R1b	R1b
NA12043	R1b2	1.98748	R	R	R	R	R	R	R	R	H	O	R	N	R	R	R	R	R	R	R	R	R	R	R	C	R	R	R	R	R	R	R	R	R	R	R	O	R1b	R1b	R1b	R1b	R1b	R1b	R1b	R1b	R1b	R1b	R1b
NA12045	R1b2	4.24844	R	IJ	IJ	IJ	IJ	IJ	H	IJ	H	O	N	H	R												R	R	R	R	R	R	R	R	R	R	R	H	R1b	R1b	R1b	R1b	R1b	R1b	R1b	R1b	R1b	R1b	R1b
NA12154	R1b2	3.23972	R	IJ	IJ	IJ	R	IJ	IJ	R	H	O	O	O	R	R	R	R	R	R	R	R	R	R	R	O	R	R	R	R	R	R	R	R	R	R	H	AB	R1b	R1b	R1b	R1b	R1b	R1b	R1b	R1b	R1b	R1b	R1b
NA12340	R1b2	2.13921	R	IJ	R	R	R	R	H	H	H	R	O	O	R	R	R	R	R	R	R	R	R	R	R	R	R	R	R	R	R	R	R	R	R	R	R	LT	R1b	R1b	R1b	R1b	R1b	R1b	R1b	R1b	R1b	R1b	R1b
NA12399	R1b2	1.9179	R	R	R	R	IJ	IJ	R	IJ	O	O	H	R	R	R	R	R	R	R	R	R	R	R	R	R	R	R	R	R	R	R	R	R	R	R	R	O	R1b	R1b	R1b	R1b	R1b	R1b	R1b	R1b	R1b	R1b	R1b
NA12762	R1b2	2.86082	R	R	R	R	R	R	R	H	H	R	R	O	R	R	R	R	R	R	R	R	R	R	R	Q	R	R	R	R	R	R	R	R	R	R	R	E	R1b	R1b	R1b	R1b	R1b	R1b	R1b	R1b	R1b	R1b	R1b
NA19658	R1b2	2.71274	R	IJ	R	R	R	R	R	IJ	R	H	H	H	R	R	R	R	R	R	R	R	R	R	R	R	R	R	R	R	R	R	R	R	R	R	H	C	R1b	R1b	R1b	R1b	R1b	R1b	R1b	R1b	R1b	R1b	R1b
NA19717	R1b2	2.1876	R	R	R	R	R	R	H	R	R	R	R	E	R	R	R	R	R	R	R	R	R	O	G	E	R	R	R	R	R	R	R	R	R	R	R	O	R1b	R1b	R1b	R1b	R1b	R1b	R1b	R1b	R1b	R1b	R1b
NA19789	R1b2	3.37357	R	IJ	R	R	R	IJ	R	R	H	R	O	O	R	R	R	R	R	R	R	R	R	R	R	H	R	R	R	R	R	R	R	R	R	R	R	R	R1b	R1b	R1b	R1b	R1b	R1b	R1b	R1b	R1b	R1b	R1b
NA20278	R1b2	1.64793	R	IJ	IJ	IJ	R	R	R	R	R	H	O	H	R	R	R	R	R	R	R	R	R	R	R	LT	R	R	R	R	R	R	R	R	R	Q	R	R	R1b	R1b	R1b	R1b	R1b	R1b	R1b	R1b	R1b	R1b	R1b
NA20318	R1b2	2.74475	R	R	R	R	R	R	IJ	R	H	H	H	O	R	R	R	R	R	R	R	R	R	R	H	R	R	R	R	R	R	R	R	R	R	R	R	Q	R1b	R1b	R1b	R1b	R1b	R1b	R1b	R1b	R1b	R1b	R1b
HG00107	R1b3	2.9257	R	IJ	R	R	R	R	R	O	O	O	R	O	R	R	R	R	R	R	R	R	R	R	R	R	R	R	R	R	R	R	R	R	R	R	R	LT	R1b	R1b	R1b	R1b	R1b	R1b	R1b	R1b	R1b	R1b	R1b
HG00112	R1b3	1.84219	R	R	R	R	R	R	R	H	H	O	H	C	R	R	R	R	R	R	R	R	R	R	R	R	R	R	R	R	R	R	R	R	R	R	R	R	R1b	R1b	R1b	R1b	R1b	R1b	R1b	R1b	R1b	R1b	R1b
HG00126	R1b3	2.8105	R	IJ	R	R	IJ	IJ	R	H	R	H	N	H	R												R	R	R	R	R	R	R	R	R	R	R	H	R1b	R1b	R1b	R1b	R1b	R1b	R1b	R1b	R1b	R1b	R1b
HG00141	R1b3	4.96208	R	IJ	R	R	R	R	R	R	R	H	O	H	R	R	R	R	R	R	R	R	R	R	R	R	R	R	R	R	R	R	R	R	R	R	R	R	R1b	R1b	R1b	R1b	R1b	R1b	R1b	R1b	R1b	R1b	R1b
HG00264	R1b3	1.6155	R	IJ	IJ	IJ	R	R	R	IJ	O	O	R	H	R	R	R	R	R	R	R	R	R	R	R	O	R	R	R	R	R	R	R	R	R	R	R	IJ	R1b	R1b	R1b	R1b	R1b	R1b	R1b	R1b	R1b	R1b	R1b
HG00637	R1b3	1.39132	R	R	R	R	R	R	IJ	R	R	R	O	O	R	R	R	R	R	R	R	R	R	Q	R	G	R	R	R	R	R	R	R	R	R	R	R	Q	R1b	R1b	R1b	R1b	R1b	R1b	R1b	R1b	R1b	R1b	R1b
HG00731	R1b3	9.59808	R	IJ	IJ	IJ	IJ	R	IJ	O	H	R	H	G	R	R	R	R	R	R	R	R	R	R	R	R	R	R	R	R	R	R	R	R	R	R	R	R	R1b	R1b	R1b	R1b	R1b	R1b	R1b	R1b	R1b	R1b	R1b
HG00739	R1b3	4.37767	R	R	R	R	R	R	IJ	R	R	R	R	N	R	R	R	R	R	R	R	R	R	R	H	R	R	R	R	R	R	R	R	R	R	R	O	G	R1b	R1b	R1b	R1b	R1b	R1b	R1b	R1b	R1b	R1b	R1b
HG00742	R1b3	2.35132	R	R	R	R	IJ	R	R	R	H	O	H	H	R												R	R	R	R	R	R	R	R	R	R	Q	O	R1b	R1b	R1b	R1b	R1b	R1b	R1b	R1b	R1b	R1b	R1b
HG01047	R1b3	2.25333	R	IJ	IJ	IJ	IJ	H	IJ	R	O	H	AB	H	R	R	R	R	R	R	R	R	R	H	R	R	R	R	R	R	R	R	R	R	R	R	R	O	R1b	R1b	R1b	R1b	R1b	R1b	R1b	R1b	R1b	R1b	R1b
HG01048	R1b3	3.39017	R	IJ	IJ	IJ	IJ	IJ	IJ	R	O	H	O	R	R	R	R	R	R	R	R	R	R	O	Q	R	R	R	R	R	R	R	R	R	R	R	G	G	R1b	R1b	R1b	R1b	R1b	R1b	R1b	R1b	R1b	R1b	R1b
HG01063	R1b3	2.73461	R	R	R	R	R	R	R	R	O	O	O	O	R	R	R	R	R	R	R	R	R	H	O	H	R	R	R	R	R	R	R	R	R	R	R	Q	R1b	R1b	R1b	R1b	R1b	R1b	R1b	R1b	R1b	R1b	R1b
HG01075	R1b3	6.61045	R	IJ	IJ	IJ	IJ	R	IJ	R	H	O	R	H	R	R	R	R	R	R	R	R	R	H	R	R	R	R	R	R	R	R	R	R	R	R	R	H	R1b	R1b	R1b	R1b	R1b	R1b	R1b	R1b	R1b	R1b	R2
HG01085	R1b3	2.83903	R	R	R	R	R	IJ	R	R	H	O	R	R	R	R	R	R	R	R	R	R	R	R	R	AB	R	R	R	R	R	R	R	R	R	R	R	H	R1b	R1b	R1b	R1b	R1b	R1b	R1b	R1b	R1b	R1b	R1b
HG01121	R1b3	2.3221	R	R	R	R	R	R	R	H	O	H	H	R	R	R	R	R	R	R	R	R	R	R	H	R	R	R	R	R	R	R	R	R	R	R	H	G	R1b	R1b	R1b	R1b	R1b	R1b	R1b	R1b	R1b	R1b	R1b
HG01148	R1b3	1.56182	R	IJ	R	R	R	R	R	R	O	O	R	H	R	R	R	R	R	R	R	R	R	R	R	E	R	R	R	R	R	R	R	R	R	R	R	R	R1b	R1b	R1b	R1b	R1b	R1b	R1b	R1b	R1b	R1a	R1b
HG01170	R1b3	2.15166	R	IJ	IJ	IJ	R	IJ	R	O	O	H	N	O	R	R	R	R	R	R	R	R	R	R	H	R	R	R	R	R	R	R	R	R	R	R	R	R	R1b	R1b	R1b	R1b	R1b	R1b	R1b	R1b	R1b	R1b	R1b
HG01173	R1b3	2.12193	R	IJ	IJ	IJ	IJ	IJ	R	O	H	H	R	O	R	R	R	R	R	R	R	R	R	R	R	IJ	R	R	R	R	R	R	R	R	R	R	O	AB	R1b	R1b	R1b	R1b	R1b	R1b	R1b	R1b	R1b	R1b	R1b
HG01176	R1b3	7.12309	R	IJ	IJ	IJ	R	IJ	IJ	IJ	G	R	AB	O	R	R	R	R	R	R	R	R	R	R	R	R	R	R	R	R	R	R	R	R	R	R	Q	Q	R1b	R1b	R1b	R1b	R1b	R1b	R1b	R1b	R1b	R1b	R1b
HG01182	R1b3	2.03126	R	G	IJ	IJ	IJ	IJ	IJ	O	O	R	LT	AB	R	R	R	R	R	R	R	R	H	R	H	N	R	R	R	R	R	R	R	R	R	R	R	H	R1b	R1b	R1b	R1b	R1b	R1b	R1b	R1b	R1b	R1b	R1b
HG01241	R1b3	4.34106	R	IJ	R	R	R	R	R	H	R	H	O	H	R	R	R	R	R	R	R	R	R	R	R	G	R	R	R	R	R	R	R	R	R	R	R	R	R1b	R1b	R1b	R1b	R1b	R1b	R1b	R1b	R1b	R1b	R1b
HG01247	R1b3	2.63837	R	IJ	R	R	R	R	R	R	H	R	R	G	R	R	R	R	R	R	R	R	R	R	R	G	R	R	R	R	R	R	R	R	R	R	O	LT	R1b	R1b	R1b	R1b	R1b	R1b	R1b	R1b	R1b	R1b	R1b
HG01259	R1b3	2.72191	R	IJ	R	IJ	R	R	R	R	O	O	O	N	R	R	R	R	R	R	R	R	R	R	O	R	R	R	R	R	R	R	R	R	R	R	R	N	R1b	R1b	R1b	R1b	R1b	R1b	R1b	R1b	R1b	R1b	R1b
HG01271	R1b3	2.05935	R	R	R	R	IJ	IJ	R	R	R	R	R	O	R	R	R	R	R	R	R	R	R	R	R	H	R	R	R	R	R	R	R	R	R	R	R	G	R1b	R1b	R1b	R1b	R1b	R1b	R1b	R1b	R1b	R1b	R1b
HG01280	R1b3	3.15172	R	R	R	R	R	R	R	IJ	R	R	H	H	R	R	R	R	R	R	R	R	R	O	R	R	R	R	R	R	R	R	R	R	R	R	R	R	R1b	R1b	R1b	R1b	R1b	R1b	R1b	R1b	R1b	R1b	R1b
HG01286	R1b3	1.85191	R	R	R	R	R	R	R	R	R	R	R	O	R												R	R	R	R	R	R	R	R	R	R	R	IJ	R1b	R1b	R1b	R1b	R1b	R1b	R1b	R1b	R1b	R1b	R1b
HG01341	R1b3	2.26448	R	IJ	IJ	IJ	R	R	R	H	R	N	R	H	R	R	R	R	R	R	R	R	R	IJ	R	Q	R	R	R	R	R	R	R	R	R	R	R	H	R1b	R1b	R1b	R1b	R1b	R1b	R1b	R1b	R1b	R1b	R1b
HG01350	R1b3	2.06982	R	IJ	IJ	IJ	R	R	IJ	R	H	H	R	R	R	R	R	R	R	R	R	R	R	R	R	R	R	R	R	R	R	R	R	R	R	R	R	H	R1b	R1b	R1b	R1b	R1b	R1b	R1b	R1b	R1b	R1b	G
HG01353	R1b3	1.89216	R	IJ	IJ	R	R	R	R	R	O	O	H	H	R												R	R	R	R	R	R	R	R	R	R	R	H	R1b	R1b	R1b	R1b	R1b	R1b	R1b	R1b	R1b	R1a	R1b
HG01359	R1b3	2.29701	R	IJ	IJ	IJ	R	IJ	R	R	O	O	N	O	R	R	R	R	R	R	R	R	R	LT	Q	G	R	R	R	R	R	R	R	R	R	Q	R	R	R1b	R1b	R1b	R1b	R1b	R1b	R1b	R1b	R1b	R1b	R1b
HG01365	R1b3	1.98991	R	IJ	IJ	IJ	IJ	IJ	R	O	O	O	H	O	R												R	R	R	R	R	R	R	R	R	R	R	R	R1b	R1b	R1b	R1b	R1b	R1b	R1b	R1b	R1b	R1b	R1b
HG01374	R1b3	1.6838	R	IJ	IJ	IJ	IJ	R	R	H	H	R	H	O	R												R	R	R	R	R	R	R	R	R	R	O	O	R1b	R1b	R1b	R1b	R1b	R1b	R1b	R1b	R1b	R1b	R1b
HG01392	R1b3	3.3084	R	R	R	R	R	R	IJ	O	R	R	H	H	R												R	R	R	R	R	R	R	R	R	R	R	AB	R1b	R1b	R1b	R1b	R1b	R1b	R1b	R1b	R1b	H	R1b
HG01395	R1b3	3.00486	R	R	R	R	R	R	R	R	IJ	O	O	H	R	R	R	R	R	R	R	R	R	R	R	R	R	R	R	R	R	R	R	R	R	R	R	H	R1b	R1b	R1b	R1b	R1b	R1b	R1b	R1b	R1b	R1b	R1b
HG01398	R1b3	1.95605	R	R	R	R	R	IJ	R	O	R	R	O	AB	R	R	R	R	R	R	R	R	R	R	R	G	R	R	R	R	R	R	R	R	R	R	R	Q	R1b	R1b	R1b	R1b	R1b	R1b	R1b	R1b	R1b	R1b	R1b
HG01413	R1b3	3.17736	R	IJ	R	R	R	IJ	IJ	R	H	E	O	H	R	R	R	R	R	R	R	R	R	R	R	R	R	R	R	R	R	R	R	R	R	R	R	IJ	R1b	R1b	R1b	R1b	R1b	R1b	R1b	R1b	R1b	R1b	R1b
HG01440	R1b3	2.20892	R	IJ	IJ	IJ	IJ	IJ	O	N	IJ	O	O	O	R	R	R	R	R	R	R	R	R	R	R	G	R	R	R	R	R	R	R	R	R	R	R	R	R1b	R1b	R1b	R1b	R1b	R1b	R1b	R1b	R1b	H	R1b
HG01443	R1b3	2.13286	R	IJ	R	R	IJ	R	R	R	R	O	O	H	R	R	R	R	R	R	R	R	R	IJ	R	R	R	R	R	R	R	R	R	R	R	R	H	Q	R1b	R1b	R1b	R1b	R1b	R1b	R1b	R1b	R1b	R1b	R1b
HG01461	R1b3	2.23133	R	IJ	IJ	IJ	IJ	IJ	IJ	IJ	IJ	O	O	G	R												R	R	R	R	R	R	R	R	R	R	R	R	R1b	R1b	R1b	R1b	R1b	R1b	R1b	R1b	R1b	R1b	R1b
HG01464	R1b3	5.0109	R	R	R	R	IJ	R	IJ	H	O	H	O	C	R	R	R	R	R	R	R	Q	R	R	R	O	R	R	R	R	R	R	R	R	R	R	R	R	R1b	R1b	R1b	R1b	R1b	R1b	R1b	R1b	R1b	R1b	R1b
HG01479	R1b3	1.95114	R	R	R	R	R	R	R	O	R	H	R	N	R	R	R	R	R	R	R	R	R	R	R	H	R	R	R	R	R	R	R	R	R	R	R	H	R1b	R1b	R1b	R1b	R1b	R1b	R1b	R1b	R1b	R1b	R1b
HG01488	R1b3	2.34608	R	IJ	IJ	IJ	R	R	IJ	R	H	O	H	O	R	R	R	R	R	R	R	R	R	R	R	R	R	R	R	R	R	R	R	R	R	R	R	N	R1b	R1b	R1b	R1b	R1b	R1b	R1b	R1b	R1b	R1b	R1a
HG01491	R1b3	2.16706	R	IJ	IJ	IJ	IJ	R	IJ	H	O	G	R	H	R	R	R	R	R	R	R	R	R	H	H	H	R	R	R	R	R	R	R	R	R	H	R	R	R1b	R1b	R1b	R1b	R1b	R1b	R1b	R1b	R1b	R1b	R1b
HG01506	R1b3	1.98221	R	R	R	R	R	R	IJ	R	O	O	H	R	R	R	R	R	R	R	R	R	Q	R	R	R	R	R	R	R	R	R	R	R	R	R	R	AB	R1b	R1b	R1b	R1b	R1b	R1b	R1b	R1b	R1b	R1b	R1b
HG01518	R1b3	1.79338	R	R	R	R	R	R	R	R	H	H	O	O	R	R	R	R	R	R	R	R	R	R	Q	N	R	R	R	R	R	R	R	R	R	R	R	R	R1b	R1b	R1b	R1b	R1b	R1b	R1b	R1b	R1b	R1b	R1b
HG01521	R1b3	1.63265	R	R	R	R	R	R	R	O	R	R	R	O	R												R	R	R	R	R	R	R	R	R	R	R	H	R1b	R1b	R1b	R1b	R1b	R1b	R1b	R1b	R1b	R1b	R1b
HG01524	R1b3	2.78513	R	IJ	R	R	R	R	R	O	R	O	R	H	R	R	R	R	R	R	R	R	R	R	R	Q	R	R	R	R	R	R	R	R	R	R	R	R	R1b	R1b	R1b	R1b	R1b	R1b	R1b	R1b	R1b	R1b	R1b
HG01577	R1b3	1.59011	R	R	R	R	R	R	R	R	R	R	R	G	R	R	R	R	R	R	R	R	R	R	O	R	R	R	R	R	R	R	R	R	R	R	R	H	R1b	R1b	R1b	R1b	R1b	R1b	R1b	R1b	R1b	R1b	R1b
HG01603	R1b3	1.82126	R	R	R	R	R	R	IJ	R	R	O	R	N	R	R	R	R	R	R	R	R	R	R	R	O	R	R	R	R	R	R	R	R	R	R	R	R	R1b	R1b	R1b	R1b	R1b	R1b	R1b	R1b	R1b	R1b	R2
HG01606	R1b3	1.76132	R	R	R	R	R	R	R	R	H	O	H	H	R	R	R	R	R	R	R	R	R	R	Q	Q	R	R	R	R	R	R	R	R	R	R	R	R	R1b	R1b	R1b	R1b	R1b	R1b	R1b	R1b	R1b	R1b	O25
HG01608	R1b3	1.9391	R	R	R	R	R	R	IJ	O	R	H	G	O	R	R	R	R	R	R	R	R	R	R	R	R	R	R	R	R	R	R	R	R	R	R	R	G	R1b	R1b	R1b	R1b	R1b	R1b	R1b	R1b	R1b	R1b	R1b
HG01615	R1b3	1.69108	R	R	R	R	R	R	R	R	O	O	H	H	R	R	R	R	R	R	R	Q	R	H	R	H	R	R	R	R	R	R	R	R	R	R	R	IJ	R1b	R1b	R1b	R1b	R1b	R1b	R1b	R1b	R1b	R1b	R1b
HG01624	R1b3	2.83718	R	R	R	IJ	R	IJ	R	IJ	R	O	H	H	R	R	R	R	R	R	R	R	R	R	H	O	R	R	R	R	R	R	R	R	R	R	R	O	R1b	R1b	R1b	R1b	R1b	R1b	R1b	R1b	R1b	R1b	R1b
HG01630	R1b3	2.84541	R	R	R	R	IJ	IJ	R	R	R	H	O	H	R	R	R	R	R	R	R	R	R	R	R	R	R	R	R	R	R	R	R	R	R	R	R	H	R1b	R1b	R1b	R1b	R1b	R1b	R1b	R1b	R1b	R1b	O25
HG01631	R1b3	2.82783	R	IJ	R	R	R	IJ	R	R	H	H	R	H	R	R	R	R	R	R	R	R	R	LT	R	R	R	R	R	R	R	R	R	R	R	R	R	Q	R1b	R1b	R1b	R1b	R1b	R1b	R1b	R1b	R1b	R1b	R1b
HG01669	R1b3	1.25496	R	R	R	R	R	R	R	H	R	O	O	G	R	R	R	R	R	R	R	R	R	R	R	AB	R	R	R	R	R	R	R	R	R	R	R	R	R1b	R1b	R1b	R1b	R1b	R1b	R1b	R1b	R1b	R1b	R1b
HG01694	R1b3	2.25089	R	IJ	R	R	R	R	R	H	H	R	O	O	R												R	R	R	R	R	R	R	R	R	R	R	R	R1b	R1b	R1b	R1b	R1b	R1b	R1b	R1b	R1b	R1b	R1b
HG01700	R1b3	2.60351	R	R	R	R	R	R	R	R	R	O	O	H	R	R	R	R	R	R	R	R	R	O	R	Q	R	R	R	R	R	R	R	R	R	Q	R	R	R1b	R1b	R1b	R1b	R1b	R1b	R1b	R1b	R1b	R1b	R1b
HG01705	R1b3	2.94233	R	R	R	R	R	R	IJ	R	O	H	H	R	R	R	R	R	R	R	R	R	R	R	O	Q	R	R	R	R	R	R	R	R	R	R	H	R	R1b	R1b	R1b	R1b	R1b	R1b	R1b	R1b	R1b	R1b	R1a
HG01708	R1b3	3.19597	R	R	R	R	IJ	R	IJ	R	R	H	R	C	R	R	R	R	R	R	R	R	R	R	R	Q	R	R	R	R	R	R	R	R	R	Q	R	H	R1b	R1b	R1b	R1b	R1b	R1b	R1b	R1b	R1b	R1b	R1b
HG01709	R1b3	3.15975	R	R	R	R	R	R	Q	H	H	H	R	O	R	R	R	R	R	R	R	R	R	R	R	R	R	R	R	R	R	R	R	R	R	R	O	IJ	R1b	R1b	R1b	R1b	R1b	R1b	R1b	R1b	R1b	R1b	R1b
HG01747	R1b3	2.8099	R	R	R	R	R	R	R	H	O	H	R	O	R												R	R	R	R	R	R	R	R	R	R	R	R	R1b	R1b	R1b	R1b	R1b	R1b	R1b	R1b	R1b	R1b	R1b
HG01761	R1b3	5.32613	R	R	R	R	R	R	R	H	O	R	R	O	R	R	R	R	R	R	R	R	R	R	H	Q	R	R	R	R	R	R	R	R	R	H	R	E	R1b	R1b	R1b	R1b	R1b	R1b	R1b	R1b	R1b	R1b	R1b
HG01765	R1b3	3.00485	R	R	R	R	R	R	R	H	R	O	R	AB	R	R	R	R	R	R	R	R	R	R	H	H	R	R	R	R	R	R	R	R	R	R	R	LT	R1b	R1b	R1b	R1b	R1b	R1b	R1b	R1b	R1b	R1b	R1b
HG01771	R1b3	4.90564	R	R	R	R	R	H	R	O	R	R	R	R	R												R	R	R	R	R	R	R	R	R	R	R	R	R1b	R1b	R1b	R1b	R1b	R1b	R1b	R1b	R1b	R1b	O25
HG01775	R1b3	2.0492	R	R	R	R	R	R	R	H	R	R	R	H	R	R	R	R	R	R	R	R	R	Q	R	N	R	R	R	R	R	R	R	R	R	O	R	C	R1b	R1b	R1b	R1b	R1b	R1b	R1b	R1b	R1b	R1b	R1b
HG01783	R1b3	3.30006	R	R	R	R	R	R	R	R	R	R	O	C	R	R	R	R	R	R	R	R	R	Q	O	Q	R	R	R	R	R	R	R	R	R	R	R	R	R1b	R1b	R1b	R1b	R1b	R1b	R1b	R1b	R1b	R1b	R1b
HG01785	R1b3	2.00456	R	R	R	R	R	IJ	H	O	R	O	O	R	R	R	R	R	R	R	R	R	R	R	O	R	R	R	R	R	R	R	R	R	R	R	R	C	R1b	R1b	R1b	R1b	R1b	R1b	R1b	R1b	R1b	R1b	R1b
HG01789	R1b3	1.68287	R	R	R	R	R	R	R	R	R	O	N	O	R	R	R	R	R	R	R	R	H	R	R	R	R	R	R	R	R	R	R	R	R	Q	R	R	R1b	R1b	R1b	R1b	R1b	R1b	R1b	R1b	R1b	R1b	R1b
HG01791	R1b3	1.5004	R	R	R	R	R	R	R	IJ	O	N	R	O	R	R	R	R	R	R	R	R	R	R	R	H	R	R	R	R	R	R	R	R	R	R	R	H	R1b	R1b	R1b	R1b	R1b	R1b	R1b	R1b	R1b	R1b	R1b
HG01879	R1b3	1.70281	R	IJ	IJ	R	R	R	R	R	R	R	R	N	R	R	R	R	R	R	R	R	R	R	R	LT	R	R	R	R	R	R	R	R	R	R	R	C	R1b	R1b	R1b	R1b	R1b	R1b	R1b	R1b	R1b	R1b	R1b
HG01917	R1b3	2.58037	R	IJ	R	R	R	R	R	O	R	O	H	O	R	R	R	R	R	R	R	R	R	R	O	R	R	R	R	R	R	R	R	R	R	R	R	R	R1b	R1b	R1b	R1b	R1b	R1b	R1b	R1b	R1b	R1b	R1b
HG01932	R1b3	2.39122	R	R	R	R	R	IJ	IJ	IJ	R	R	R	H	R	R	R	R	R	R	R	R	R	R	O	AB	R	R	R	R	R	R	R	R	R	R	R	R	R1b	R1b	R1b	R1b	R1b	R1b	R1b	R1b	R1b	R1b	O6
HG02002	R1b3	3.0331	R	IJ	R	IJ	R	IJ	R	R	R	O	O	O	R												R	R	R	R	R	R	R	R	R	R	R	R	R1b	R1b	R1b	R1b	R1b	R1b	R1b	R1b	R1b	R1b	R1b
HG02221	R1b3	1.7455	R	R	R	IJ	IJ	R	IJ	H	R	O	N	G	R	R	R	R	R	R	R	R	R	O	R	R	R	R	R	R	R	R	R	R	R	R	R	G	R1b	R1b	R1b	R1b	R1b	R1b	R1b	R1b	R1b	R1b	R1b
NA12347	R1b3	2.9244	R	R	R	R	R	R	R	O	R	O	H	IJ	R	R	R	R	R	R	R	R	R	R	O	R	R	R	R	R	R	R	R	R	R	R	R	O	R1b	R1b	R1b	R1b	R1b	R1b	R1b	R1b	R1b	R1b	R1b
NA12716	R1b3	2.23234	R	IJ	R	R	R	IJ	IJ	IJ	R	O	O	O	R	R	R	R	R	R	R	R	R	R	R	E	R	R	R	R	R	R	R	R	R	R	G	R	R1b	R1b	R1b	R1b	R1b	R1b	R1b	R1b	R1b	R1b	R1b
NA12812	R1b3	3.5853	R	R	R	R	R	R	R	H	R	O	R	H	R	R	R	R	R	R	R	R	R	R	Q	R	R	R	R	R	R	R	R	R	R	R	R	C	R1b	R1b	R1b	R1b	R1b	R1b	R1b	R1b	R1b	R1b	R1b
NA12814	R1b3	2.84709	R	R	R	R	R	R	R	O	R	O	R	AB	R	R	R	R	R	R	R	R	R	R	R	H	R	R	R	R	R	R	R	R	R	R	R	O	R1b	R1b	R1b	R1b	R1b	R1b	R1b	R1b	R1b	R1b	R1b
NA12874	R1b3	3.75725	R	R	R	R	R	R	R	R	R	R	R	H	R	R	R	R	R	R	R	R	R	R	R	R	R	R	R	R	R	R	R	R	R	R	R	R	R1b	R1b	R1b	R1b	R1b	R1b	R1b	R1b	R1b	R1b	R1b
NA19741	R1b3	2.68147	R	R	R	R	R	R	R	R	R	G	H	AB	R	R	R	R	R	R	R	R	R	R	R	C	R	R	R	R	R	R	R	R	R	R	R	R	R1b	R1b	R1b	R1b	R1b	R1b	R1b	R1b	R1b	R1b	R1b
NA19750	R1b3	1.46496	R	R	R	R	R	R	IJ	R	H	O	G	N	R												R	R	R	R	R	R	R	R	R	H	R	O	R1b	R1b	R1b	R1b	R1b	R1b	R1b	R1b	R1b	R1b	R1b
NA19756	R1b3	1.91102	R	R	R	R	R	R	R	R	H	N	R	O	R												R	R	R	R	R	R	R	R	Q	R	R	R	R1b	R1b	R1b	R1b	R1b	R1b	R1b	R1b	R1b	R1b	R1b
NA19762	R1b3	2.2302	R	R	R	R	R	IJ	R	R	H	H	O	H	R												R	R	R	R	R	R	R	R	R	R	R	G	R1b	R1b	R1b	R1b	R1b	R1b	R1b	R1b	R1b	R1b	R1b
NA19777	R1b3	3.38965	R	IJ	IJ	IJ	R	R	R	R	O	O	O	Q	R	R	R	R	R	R	R	R	R	R	R	H	R	R	R	R	R	R	R	R	R	R	H	H	R1b	R1b	R1b	R1b	R1b	R1b	R1b	R1b	R1b	R1b	R1b
NA20342	R1b3	2.0325	R	R	R	R	R	IJ	R	IJ	R	R	IJ	H	R	R	R	R	R	R	R	R	R	R	R	C	R	R	R	R	R	R	R	R	R	R	O	R	R1b	R1b	R1b	R1b	R1b	R1b	R1b	R1b	R1b	O25	R1b
NA20518	R1b3	2.91974	R	R	R	R	R	R	R	R	R	R	O	R	R	R	R	R	R	R	R	R	R	R	H	AB	R	R	R	R	R	R	R	R	R	Q	R	R	R1b	R1b	R1b	R1b	R1b	R1b	R1b	R1b	R1b	R1b	R1b
NA20519	R1b3	2.22151	R	R	R	R	R	H	R	R	O	G	O	O	R	R	R	R	R	R	R	R	R	R	H	G	R	R	R	R	R	R	R	R	R	R	Q	Q	R1b	R1b	R1b	R1b	R1b	R1b	R1b	R1b	R1b	R1b	H
NA20752	R1b3	2.939	R	R	R	R	R	R	R	H	R	R	O	IJ	R												R	R	R	R	R	R	R	R	R	R	R	R	R1b	R1b	R1b	R1b	R1b	R1b	R1b	R1b	R1b	R1a	R1a
NA20770	R1b3	2.38998	R	R	R	R	R	R	R	R	R	R	N	O	R	R	R	R	R	R	R	R	Q	H	R	O	R	R	R	R	R	R	R	R	R	R	R	R	R1b	R1b	R1b	R1b	R1b	R1b	R1b	R1b	R1b	R1b	G
HG00157	R1b4	1.70558	R	IJ	IJ	IJ	IJ	IJ	R	R	H	H	N	O	R	R	R	R	R	R	R	R	R	R	Q	Q	R	R	R	R	R	R	R	R	R	R	R	R	R1b	R1b	R1b	R1b	R1b	R1b	R1b	R1b	R1b	R1b	R1b
HG01334	R1b4	1.84216	R	IJ	IJ	R	R	R	IJ	O	H	H	O	H	R												R	R	R	R	R	R	R	R	R	R	R	Q	R1b	R1b	R1b	R1b	R1b	R1b	R1b	R1b	R1b	R1b	R1b
HG00138	R1b5	2.15498	R	IJ	IJ	IJ	IJ	IJ	IJ	H	H	O	H	N	R	R	R	R	R	R	R	R	R	O	H	LT	R	R	R	R	R	R	R	R	R	R	R	R	R1b	R1b	R1b	R1b	R1b	R1b	R1b	R1b	R1b	R1b	R1b
HG00139	R1b5	3.49862	R	IJ	R	R	IJ	R	H	R	H	G	O	O	R	R	R	R	R	R	R	R	R	O	Q	E	R	R	R	R	R	R	R	R	R	R	LT	R	R1b	R1b	R1b	R1b	R1b	R1b	R1b	R1b	R1b	R1b	R1b
NA12889	R1b5	2.8746	R	R	R	R	R	R	R	H	H	R	O	R	R	R	R	R	R	R	R	R	R	R	Q	E	R	R	R	R	R	R	R	R	R	R	R	AB	R1b	R1b	R1b	R1b	R1b	R1b	R1b	R1b	R1b	R1b	R1b
HG00131	R1b6	1.83801	R	IJ	IJ	R	IJ	R	IJ	O	O	O	H	R	R	R	R	R	R	R	R	R	R	R	R	LT	R	R	R	R	R	R	R	R	R	R	R	O	R1b	R1b	R1b	R1b	R1b	R1b	R1b	R1b	R1b	R1b	R1b
HG00143	R1b6	3.00249	R	IJ	R	IJ	R	IJ	R	H	R	O	O	O	R	R	R	R	R	R	R	R	R	R	R	H	R	R	R	R	R	R	R	R	R	R	R	AB	R1b	R1b	R1b	R1b	R1b	R1b	R1b	R1b	R1b	N4	R1b
HG00149	R1b6	3.03449	R	R	R	R	R	IJ	R	R	O	H	AB	O	R	R	R	R	R	R	R	R	R	R	R	Q	R	R	R	R	R	R	R	R	R	R	R	R	R1b	R1b	R1b	R1b	R1b	R1b	R1b	R1b	R1b	R1b	R1b
HG00155	R1b6	1.69662	R	R	R	R	R	IJ	IJ	O	O	R	O	O	R	R	R	R	R	R	R	R	R	R	H	G	R	R	R	R	R	R	R	R	R	R	R	G	R1b	R1b	R1b	R1b	R1b	R1b	R1b	R1b	R1b	R1b	R1b
HG00251	R1b6	10.2723	R	IJ	IJ	IJ	IJ	IJ	R	H	O	R	O	O	R												R	R	R	R	R	R	R	R	R	R	O	H	R1b	R1b	R1b	R1b	R1b	R1b	R1b	R1b	R1b	R1b	O25
HG00256	R1b6	3.60652	R	IJ	IJ	R	IJ	R	R	H	R	R	R	E	R	R	R	R	R	R	R	R	R	O	N	Q	R	R	R	R	R	R	R	R	R	R	R	R	R1b	R1b	R1b	R1b	R1b	R1b	R1b	R1b	R1b	R1b	R1b
HG00265	R1b6	1.53348	R	R	R	R	R	R	IJ	O	H	O	H	H	R												R	R	R	R	R	R	R	R	R	R	H	R	R1b	R1b	R1b	R1b	R1b	R1b	R1b	R1b	R1b	R1b	R1b
HG00267	R1b6	1.84645	R	IJ	IJ	R	R	IJ	R	R	H	O	R	N	R	R	R	R	R	R	R	R	R	R	O	G	R	R	R	R	R	R	R	R	R	R	R	R	R1b	R1b	R1b	R1b	R1b	R1b	R1b	R1b	R1b	R1b	R1b
HG01550	R1b6	1.76657	R	R	R	R	R	IJ	R	H	R	H	R	O	R	R	R	R	R	R	R	R	R	R	R	E	R	R	R	R	R	R	R	R	R	Q	Q	R	R1b	R1b	R1b	R1b	R1b	R1b	R1b	R1b	R1b	R1b	R1b
HG02233	R1b6	2.68057	R	IJ	IJ	IJ	R	R	IJ	H	O	H	O	Q	R	R	R	R	R	R	R	R	R	R	O	H	R	R	R	R	R	R	R	R	R	R	R	AB	R1b	R1b	R1b	R1b	R1b	R1b	R1b	R1b	R1b	R1b	R1b
HG02238	R1b6	2.68246	R	IJ	H	IJ	IJ	R	R	H	O	H	H	H	R	R	R	R	R	R	R	R	R	R	H	H	R	R	R	R	R	R	R	R	R	R	H	O	R1b	R1b	R1b	R1b	R1b	R1b	R1b	R1b	R1b	R1b	R1b
HG02281	R1b6	4.81843	R	R	R	R	R	R	R	R	R	O	R	H	R	R	R	R	R	R	R	R	R	R	O	O	R	R	R	R	R	R	R	R	R	R	R	O	R1b	R1b	R1b	R1b	R1b	R1b	R1b	R1b	R1b	R1b	R1b
HG02343	R1b6		R												R												R												R1b
HG02545	R1b6	3.20958	R	R	R	R	R	R	H	H	O	O	R	H	R	R	R	R	R	R	R	R	R	R	R	R	R	R	R	R	R	R	R	R	R	R	R	G	R1b	R1b	R1b	R1b	R1b	R1b	R1b	R1b	R1b	R1b	R1b
NA06986	R1b6	5.10008	R	IJ	IJ	IJ	IJ	IJ	IJ	IJ	O	H	R	O	R												R	R	R	R	R	R	R	R	R	R	H	G	R1b	R1b	R1b	R1b	R1b	R1b	R1b	R1b	R1b	R1b	R1b
NA07048	R1b6	1.64549	R	IJ	IJ	IJ	R	R	IJ	R	H	R	O	O	R	R	R	R	R	R	R	R	R	R	R	C	R	R	R	R	R	R	R	R	R	R	R	R	R1b	R1b	R1b	R1b	R1b	R1b	R1b	R1b	R1b	R1b	R1b
NA12272	R1b6	1.6482	R	IJ	IJ	R	R	IJ	R	H	O	O	N	G	R	R	R	R	R	R	R	R	R	R	O	R	R	R	R	R	R	R	R	R	R	R	R	Q	R1b	R1b	R1b	R1b	R1b	R1b	R1b	R1b	R1b	R1b	R1b
NA12760	R1b6	3.11991	R	R	R	R	R	IJ	R	O	O	R	R	H	R	R	R	R	R	R	R	R	R	R	R	O	R	R	R	R	R	R	R	R	R	R	R	LT	R1b	R1b	R1b	R1b	R1b	R1b	R1b	R1b	R1b	R1b	R1b
NA12775	R1b6	3.41639	R	R	R	R	IJ	R	IJ	R	R	O	H	O	R	R	R	R	R	R	R	R	R	R	R	R	R	R	R	R	R	R	R	R	R	R	R	Q	R1b	R1b	R1b	R1b	R1b	R1b	R1b	R1b	R1b	R1b	R1b
NA19922	R1b6	3.1011	R	IJ	R	IJ	IJ	R	IJ	O	O	O	O	R	R												R	R	R	R	R	R	R	R	R	R	R	N	R1b	R1b	R1b	R1b	R1b	R1b	R1b	R1b	R1b	R1b	R1b
NA20356	R1b6	1.64812	R	R	R	R	R	R	R	H	R	R	H	R	R	R	R	R	R	R	R	R	R	R	R	R	R	R	R	R	R	R	R	R	R	C	R	O	R1b	R1b	R1b	R1b	R1b	R1b	R1b	R1b	R1b	R1b	R1b
NA20524	R1b6	2.96765	R	R	R	R	R	R	IJ	H	H	R	O	H	R	R	R	R	R	R	R	R	R	H	R	AB	R	R	R	R	R	R	R	R	R	Q	R	O	R1b	R1b	R1b	R1b	R1b	R1b	R1b	R1b	R1b	R1b	R1b
NA20586	R1b6	1.6856	R	R	R	R	R	R	IJ	R	O	H	H	R	R												R	R	R	R	R	R	R	R	R	R	R	G	R1b	R1b	R1b	R1b	R1b	R1b	R1b	R1b	R1b	R1b	R1b
HG01678	R1b7	2.51994	R	IJ	R	R	R	IJ	R	R	R	R	H	O	R												R	R	R	R	R	R	R	R	R	R	R	H	R1b	R1b	R1b	R1b	R1b	R1b	R1b	R1b	R1b	R1b	R1b
HG00108	R1b8	1.98667	R	IJ	IJ	IJ	IJ	R	IJ	IJ	O	H	O	R	R	R	R	R	R	R	R	R	R	R	H	G	R	R	R	R	R	R	R	R	R	R	O	R	R1b	R1b	R1b	R1b	R1b	R1b	R1b	R1b	R1b	R1b	R1b
HG00260	R1b8	2.8359	R	IJ	R	R	R	R	IJ	R	O	O	O	Q	R	R	R	R	R	R	R	R	R	R	H	Q	R	R	R	R	R	R	R	R	R	R	R	AB	R1b	R1b	R1b	R1b	R1b	R1b	R1b	R1b	R1b	H	R1b
NA12827	R1b8	2.79501	R	R	R	R	R	IJ	R	H	R	O	G	O	R	R	R	R	R	R	R	R	R	R	R	R	R	R	R	R	R	R	R	R	R	R	R	C	R1b	R1b	R1b	R1b	R1b	R1b	R1b	R1b	R1b	R1b	R1b
NA12842	R1b8	2.73527	R	IJ	R	IJ	R	IJ	R	R	G	O	O	O	R	R	R	R	R	R	R	R	R	R	R	G	R	R	R	R	R	R	R	R	R	R	R	R	R1b	R1b	R1b	R1b	R1b	R1b	R1b	R1b	R1b	R1b	R1b
NA12872	R1b8	3.43825	R	R	R	R	R	R	IJ	O	H	O	O	O	R	R	R	R	R	R	R	R	R	H	R	AB	R	R	R	R	R	R	R	R	R	R	R	R	R1b	R1b	R1b	R1b	R1b	R1b	R1b	R1b	R1b	R1b	R1b
HG02657	R2	3.42179	R	R	R	IJ	R	IJ	IJ	H	N	H	O	AB	R	R	R	R	R	R	R	R	R	R	O	H	R	R	R	R	R	R	R	R	R	R	R	H	R2	R2	R2	R2	R2	R2	R2	R2	R2	O6	R1b
HG02660	R2	3.51975	R	IJ	R	R	IJ	IJ	IJ	R	O	G	H	R	R	R	R	R	R	R	R	R	R	R	R	G	R	R	R	R	R	R	R	R	R	R	R	C	R2	R2	R2	R2	R2	R2	R2	R2	R2	R2	R1b
HG02783	R2	3.78053	R	R	R	R	R	R	IJ	Q	R	R	H	R	R												R	R	R	R	R	R	R	R	R	R	R	R	R2	R2	R2	R2	R2	R2	R2	R2	R2	R2	H
HG03015	R2	2.40891	R	IJ	R	IJ	R	R	R	R	H	O	H	R	R												R	R	R	R	R	R	R	R	R	LT	R	H	R2	R2	R2	R2	R2	R2	R2	R2	R2	R2	R2
HG03691	R2	1.62365	R	IJ	R	R	IJ	R	R	R	O	IJ	H	H	R	R	R	R	R	R	R	R	R	R	H	R	R	R	R	R	R	R	R	R	R	R	R	R	R2	R2	R2	R2	R2	R2	R2	R2	R2	H	R2
HG03702	R2	3.34769	R	R	R	R	R	H	IJ	R	O	H	O	R	R	R	R	R	R	R	R	R	R	R	Q	O	R	R	R	R	R	R	R	R	R	R	R	N	R2	R2	R2	R2	R2	R2	R2	R2	R2	R2	R2
HG03718	R2	1.941	R	R	R	R	R	IJ	H	R	R	O	O	E	R	R	R	R	R	R	R	R	R	R	R	R	R	R	R	R	R	R	R	R	R	R	R	Q	R2	R2	R2	R2	R2	R2	R2	R2	R2	R2	R2
HG03727	R2	7.13644	R	IJ	R	IJ	IJ	R	IJ	R	O	R	R	N	R	R	R	R	R	R	R	R	R	R	R	R	R	R	R	R	R	R	R	R	R	R	LT	C	R2	R2	R2	R2	R2	R2	R2	R2	R2	R2	LT
HG03729	R2	4.05005	R	IJ	IJ	IJ	IJ	R	IJ	IJ	R	O	O	H	R	R	R	R	R	R	R	R	R	R	R	C	R	R	R	R	R	R	R	R	R	R	R	H	R2	R2	R2	R2	R2	R2	R2	H	R2	R2	G
HG03771	R2	4.26258	R	IJ	IJ	IJ	R	IJ	R	R	H	R	H	O	R	R	R	R	R	R	R	R	R	R	R	G	R	R	R	R	R	R	R	R	R	H	G	R	R2	R2	R2	R2	R2	R2	R2	R2	R2	R1b	I2
HG03773	R2	4.45229	R	IJ	R	R	IJ	R	R	H	R	H	H	IJ	R	R	R	R	R	R	R	R	R	Q	R	R	R	R	R	R	R	R	R	R	R	R	O	LT	R2	R2	R2	R2	R2	R2	R2	R2	R2	LT	R2
HG03844	R2	4.69799	R	IJ	R	R	R	IJ	R	H	H	H	H	H	R	R	R	R	R	R	R	R	R	R	R	E	R	R	R	R	R	R	R	R	R	R	Q	R	R2	R2	R2	R2	R2	R2	R2	R2	R2	R2	R1b
HG03856	R2	2.33798	R	R	R	R	IJ	R	R	R	R	O	H	R	R	R	R	R	R	R	R	R	R	Q	R	LT	R	R	R	R	R	R	R	R	R	IJ	O	G	R2	R2	R2	R2	R2	R2	R2	R2	R2	R2	J2
HG03869	R2	4.1844	R	IJ	IJ	IJ	IJ	R	R	IJ	R	H	O	H	R												R	R	R	R	R	R	R	R	R	R	R	H	R2	R2	R2	R2	R2	R2	R2	R2	R2	R1b	H
HG03967	R2	3.06583	R	IJ	R	R	IJ	R	R	R	H	H	H	H	R	R	R	R	R	R	R	R	R	R	H	R	R	R	R	R	R	R	R	R	R	R	R	R	R2	R2	R2	R2	R2	R2	R2	R2	R2	O25	R2
HG03974	R2	3.03666	R	IJ	R	R	IJ	IJ	H	R	R	R	O	H	R	R	R	R	R	R	R	R	R	R	R	R	R	R	R	R	R	R	R	R	R	R	R	Q	R2	R2	R2	R2	R2	R2	R2	R2	R2	H	R2
HG03978	R2	4.09282	R	IJ	IJ	IJ	IJ	IJ	R	H	O	H	R	O	R	R	R	R	R	R	R	R	R	R	R	R	R	R	R	R	R	R	R	R	R	R	H	R	R2	R2	R2	R2	R2	R2	R2	R2	R2	R1b	R1b
HG04022	R2	2.27766	R	R	R	IJ	R	IJ	R	R	R	R	O	H	R	R	R	R	R	R	R	R	R	R	R	H	R	R	R	R	R	R	R	R	R	R	R	R	R2	R2	R2	R2	R2	R2	R2	R2	R2	R2	R2
HG04056	R2	2.2523	R	R	R	R	R	R	IJ	H	O	H	R	N	R	R	R	R	R	R	R	R	R	Q	R	C	R	R	R	R	R	R	R	R	R	R	R	R	R2	R2	R2	R2	R2	R2	R2	R2	R2	R2	R2
HG04152	R2	3.05555	R	R	R	R	R	R	H	H	R	O	O	H	R	R	R	R	R	R	R	R	R	R	R	Q	R	R	R	R	R	R	R	R	R	R	R	R	R2	R2	R2	R2	R2	R2	R2	R2	R2	R2	R2
HG04158	R2	1.09518	R	R	R	IJ	R	IJ	R	R	R	R	O	H	R	R	R	R	R	R	R	R	R	R	R	R	R	R	R	R	R	R	R	R	R	R	R	R	R2	R2	R2	R2	R2	R2	R2	R2	R2	R2	O25
HG04182	R2	2.01995	R	R	R	R	R	IJ	R	O	H	R	R	N	R	R	R	R	R	R	R	R	R	R	O	Q	R	R	R	R	R	R	R	R	R	R	IJ	O	R2	R2	R2	R2	R2	R2	R2	R2	R2	R2	H
HG04225	R2	2.66088	R	R	R	R	R	IJ	R	R	R	H	O	O	R	R	R	R	R	R	R	R	R	R	R	H	R	R	R	R	R	R	R	R	R	R	R	R	R2	R2	R2	R2	R2	R2	R2	R2	R2	R1b	R2
NA20845	R2	2.46975	R	IJ	R	R	R	IJ	R	H	G	R	R	H	R	R	R	R	R	R	R	R	R	H	R	E	R	R	R	R	R	R	R	R	R	R	R	R	R2	R2	R2	R2	R2	R2	R2	R2	R2	R2	R2
NA20887	R2	2.23183	R	R	R	R	R	R	H	R	H	O	H	O	R	R	R	R	R	R	R	R	R	R	R	IJ	R	R	R	R	R	R	R	R	R	IJ	R	G	R2	R2	R2	R2	R2	R2	R2	R2	R2	H	R2
NA20895	R2	2.9736	R	R	R	R	R	R	IJ	H	Q	R	H	H	R	R	R	R	R	R	R	R	R	R	R	R	R	R	R	R	R	R	R	R	R	R	H	R	R2	R2	R2	R2	R2	R2	R2	R2	R2	R2	H
NA20903	R2	2.85262	R	IJ	IJ	IJ	R	R	IJ	IJ	R	H	R	N	R												R	R	R	R	R	R	R	R	R	R	O	N	R2	R2	R2	R2	R2	R2	R2	R2	R2	J2	R2
NA21105	R2	2.67485	R	R	R	R	R	IJ	H	H	R	E	N	C	R	R	R	R	R	R	R	R	R	R	H	R	R	R	R	R	R	R	R	R	R	Q	R	O	R2	R2	R2	R2	R2	R2	R2	R2	R2	H	R2
HG01586	R2	2.02017	R	R	R	R	R	Q	IJ	R	H	H	O	N	R	R	R	R	R	R	R	R	R	R	R	E	R	R	R	R	R	R	R	R	R	R	R	R	R2	R2	R2	R2	R2	R2	R2	R2	R2	R1b	R2
HG01133	T1a	7.7219	LT	LT	LT	IJ	LT	IJ	LT	H	H	H	H	H	LT	LT	LT	LT	LT	LT	LT	LT	LT	H	H	AB	LT	LT	LT	LT	LT	LT	LT	LT	LT	H	H	H	LT	LT	LT	LT	LT	LT	LT	LT	LT	LT	LT
HG01190	T1a	2.43354	LT	LT	LT	LT	LT	LT	LT	LT	G	H	AB	O	LT	LT	LT	LT	LT	LT	LT	LT	LT	H	LT	AB	LT	LT	LT	LT	LT	LT	LT	LT	LT	LT	G	H	LT	LT	LT	LT	LT	LT	LT	LT	LT	LT	G
NA19655	T1a	1.79891	LT	LT	LT	LT	LT	LT	LT	LT	H	O	O	R	LT												LT	LT	LT	LT	LT	LT	LT	LT	LT	H	R	H	LT	LT	LT	LT	LT	LT	LT	LT	LT	LT	O6
NA20520	T1a	2.42319	LT	LT	LT	LT	LT	LT	LT	H	H	C	H	H	LT												LT	LT	LT	LT	LT	LT	LT	LT	LT	LT	LT	IJ	LT	LT	LT	LT	LT	LT	LT	LT	H	LT	LT
NA20527	T1a	2.91552	LT	LT	LT	LT	LT	LT	LT	O	H	H	H	AB	LT	LT	LT	LT	LT	LT	LT	LT	LT	H	LT	O	LT	LT	LT	LT	LT	LT	LT	LT	LT	LT	LT	H	LT	LT	LT	LT	LT	LT	LT	LT	LT	H	I1
HG01051	T1a	2.28492	LT	IJ	IJ	IJ	IJ	IJ	IJ	IJ	IJ	H	H	N	LT	LT	LT	LT	LT	LT	LT	LT	LT	LT	H	Q	LT	LT	LT	LT	LT	LT	LT	LT	LT	LT	IJ	H	LT	LT	LT	LT	LT	LT	LT	LT	LT	H	H
HG01530	T1a	2.81368	LT	H	IJ	H	IJ	H	H	H	H	H	H	C	LT	LT	LT	LT	LT	LT	LT	H	LT	H	Q	G	LT	LT	LT	LT	LT	LT	LT	LT	LT	LT	AB	H	LT	LT	LT	LT	LT	LT	LT	LT	LT	LT	H
NA20758	T1a	3.02816	LT	IJ	IJ	IJ	IJ	H	H	H	H	R	N	R	LT	LT	LT	LT	LT	LT	LT	H	LT	H	G	H	LT	LT	LT	LT	LT	LT	LT	H	LT	LT	LT	C	LT	LT	LT	LT	LT	LT	LT	LT	LT	LT	LT
[truncated: 61 more columns]

[truncated: 9 more sheets: 11. HGDP validation, 12.SGDP validation, 13. Wide Validation summary, 14. Damgaard_aDNA, 15_Gretzinger_aDNA, 16_Saag_aDNA, 17. Estonian NIPS, 18. Chinese NIPS, 19. NIPT summary]
